# Supplementary material
Source: PubMed Central journal article supplement (PMC8586734)
Supplement: mmc1.pdf [file mmc1.pdf]

# THE LANCET

## Supplementary appendix

This appendix formed part of the original submission and has been peer reviewed. We post it as supplied by the authors.

Supplement to: COVID-19 Mental Disorders Collaborators. Global prevalence and burden of depressive and anxiety disorders in 204 countries and territories in 2020 due to the COVID-19 pandemic. *Lancet* 2021; published online Oct 8. [http://dx.doi.org/10.1016/S0140-6736\(21\)02143-7](http://dx.doi.org/10.1016/S0140-6736(21)02143-7).

## **Appendix: Supplementary methods and results to “Estimating the global prevalence and burden of depressive and anxiety disorders in 2020 due to the COVID-19 pandemic”**

This appendix provides supplemental methods, figures and more detailed results for “Estimating the global prevalence and burden of depressive and anxiety disorders in 2020 due to the COVID-19 pandemic.”

### **Table of Contents**

|                                                                                                                                                                                   |    |
|-----------------------------------------------------------------------------------------------------------------------------------------------------------------------------------|----|
| List of figures and tables .....                                                                                                                                                  | 3  |
| Figures .....                                                                                                                                                                     | 3  |
| Tables.....                                                                                                                                                                       | 3  |
| Section 1. Statement of GATHER compliance .....                                                                                                                                   | 4  |
| Section 2. Search strategy for data sources reporting the prevalence of depressive and anxiety disorders during the COVID-19 pandemic .....                                       | 5  |
| Section 2.1. Pubmed .....                                                                                                                                                         | 5  |
| Section 2.2. MedRXiv .....                                                                                                                                                        | 5  |
| Section 2.3. PsyArXiv .....                                                                                                                                                       | 5  |
| Section 2.4. COVID-19 databases .....                                                                                                                                             | 5  |
| Section 2.5. Google Scholar .....                                                                                                                                                 | 5  |
| Section 3. Supplementary methods for the development of the model to predict change in prevalence of depressive and anxiety disorders .....                                       | 6  |
| Section 3.1. Case definition.....                                                                                                                                                 | 6  |
| Section 3.2. Data preparation and model specifications.....                                                                                                                       | 6  |
| Section 3.3. The inclusion and utility of market research / quota sampling studies .....                                                                                          | 7  |
| Section 4. Symptom scales vs diagnostic instruments .....                                                                                                                         | 8  |
| Section 5. Selection of COVID-19 impact indicators .....                                                                                                                          | 10 |
| Section 6. Leave-one-country-out cross-validation analysis.....                                                                                                                   | 11 |
| Section 7. References .....                                                                                                                                                       | 12 |
| Section 8. Figures and tables .....                                                                                                                                               | 17 |
| Figure S1. Graphical summary of process to estimate prevalence of major depressive disorder and anxiety disorders due to the COVID-19 pandemic .....                              | 17 |
| Figure S2. Applied example (females aged 20-24 in France) of prevalence adjustment for every day of the year 2020. ....                                                           | 18 |
| Figure S3. PRISMA flowchart for systematic review of depressive and anxiety disorder prevalence estimates during the COVID-19 pandemic .....                                      | 19 |
| Figure S4: Number of studies by country informing the meta-regression to estimate change in depressive and anxiety disorder prevalence during the COVID-19 pandemic in 2020 ..... | 20 |
| Figure S5: Prevalence of major depressive disorder per 100 000 persons due to the COVID-19 pandemic, 2020.....                                                                    | 21 |
| Figure S6: Prevalence of anxiety disorders per 100 000 persons due to the COVID-19 pandemic, 2020                                                                                 | 22 |
| Figure S7. The distribution of untransformed estimated daily COVID-19 infection rates vs square root and logarithmic transformations .....                                        | 23 |

|                                                                                                                                                                                                            |    |
|------------------------------------------------------------------------------------------------------------------------------------------------------------------------------------------------------------|----|
| Figure S8. The distribution of untransformed estimated daily excess mortality rates vs square root and logarithmic transformations.....                                                                    | 23 |
| Figure S9. Scatterplot of observed difference in logit prevalence vs predicted difference in logit prevalence from the leave-one-country-out cross-validation analysis for major depressive disorder ..... | 24 |
| Figure S10. Scatterplot of observed difference in logit prevalence vs predicted difference in logit prevalence from the leave-one-country-out cross-validation analysis for anxiety disorders .....        | 25 |
| Table S1: Guidelines for Accurate and Transparent Health Estimates Reporting (GATHER) checklist .                                                                                                          | 26 |
| Table S2: PRISMA 2020 checklist.....                                                                                                                                                                       | 28 |
| Table S3: Severity proportions and disability weights for major depressive disorder and anxiety disorders in GBD 2020 .....                                                                                | 32 |
| Table S4: Bias covariates considered in the meta-regression of change in prevalence .....                                                                                                                  | 32 |
| Table S5: Characteristics of studies and data included in the analysis .....                                                                                                                               | 33 |
| Table S6: Prevalence and DALYs of MDD per 100 000 persons, with 95% uncertainty intervals, by location, for the year 2020 .....                                                                            | 35 |
| Table S7: Prevalence and DALYs of MDD in 1000s, with 95% uncertainty intervals, by location, for the year 2020 .....                                                                                       | 43 |
| Table S8: Prevalence and DALYs of Anxiety disorders per 100 000 persons, with 95% uncertainty intervals, by location, for the year 2020 .....                                                              | 51 |
| Table S9: Prevalence and DALYs of anxiety disorders in 1000s, with 95% uncertainty intervals, by location, for the year 2020 .....                                                                         | 59 |
| Table S10: Meta-regression coefficients from initial and final prevalence-adjustment models for MDD and anxiety disorders .....                                                                            | 67 |
| Table S11: Leave-one-country-out cross-validation analysis results .....                                                                                                                                   | 68 |
| Section 9. Authors' contributions .....                                                                                                                                                                    | 80 |
| Section 9.1. Managing the estimation or publications process.....                                                                                                                                          | 80 |
| Section 9.2. Writing the first draft of the manuscript.....                                                                                                                                                | 80 |
| Section 9.3. Primary responsibility for applying analytical methods to produce estimates .....                                                                                                             | 80 |
| Section 9.4. Primary responsibility for seeking, cataloguing, extracting, or cleaning data; designing or coding figures and tables .....                                                                   | 80 |
| Section 9.5. Providing data or critical feedback on data sources .....                                                                                                                                     | 80 |
| Section 9.5. Developing methods or computational machinery .....                                                                                                                                           | 80 |
| Section 9.6. Providing critical feedback on methods or results.....                                                                                                                                        | 80 |
| Section 9.7. Drafting the work or revising is critically for important intellectual content.....                                                                                                           | 81 |
| Section 9.7. Managing the overall research enterprise .....                                                                                                                                                | 81 |

## List of figures and tables

### Figures

Figure S1. Graphical summary of process to estimate prevalence of major depressive disorder and anxiety disorders due to the COVID-19 pandemic

Figure S2. Applied example of prevalence adjustment for every day of the year 2020. Example is females aged 20–24 in Spain

Figure S3. PRISMA flowchart for systematic review of depressive and anxiety disorder prevalence estimates during the COVID-19 pandemic

Figure S4: Number of studies by country informing the meta-regression to estimate change in depressive and anxiety disorder prevalence during the COVID-19 pandemic in 2020

Figure S5: Prevalence of major depressive disorder per 100 000 persons due to the COVID-19 pandemic, 2020

Figure S6: Prevalence of anxiety disorders per 100 000 persons due to the COVID-19 pandemic, 2020

Figure S7. The distribution of untransformed estimated daily COVID-19 infection rates vs square root and logarithmic transformations

Figure S8. The distribution of untransformed estimated daily excess mortality rates vs square root and logarithmic transformations

Figure S9. Scatterplot of observed difference in logit prevalence vs predicted difference in logit prevalence from the leave-one-country-out cross-validation analysis for major depressive disorder

Figure S10. Scatterplot of observed difference in logit prevalence vs predicted difference in logit prevalence from the leave-one-country-out cross-validation analysis for anxiety disorders

### Tables

Table S1: Guidelines for Accurate and Transparent Health Estimates Reporting (GATHER) checklist

Table S2: PRISMA 2020 checklist

Table S3: Severity proportions and disability weights for major depressive disorder and anxiety disorders in GBD 2020

Table S4: Bias covariates considered in the meta-regression of change in prevalence

Table S5: Characteristics of studies and data included in the analysis

Table S6: Prevalence and DALYs of MDD per 100 000 persons, with 95% uncertainty intervals, by location, for the year 2020

Table S7: Prevalence and DALYs of MDD in 1000s, with 95% uncertainty intervals, by location, for the year 2020

Table S8: Prevalence and DALYs of Anxiety disorders per 100 000 persons, with 95% uncertainty intervals, by location, for the year 2020

Table S9: Prevalence and DALYs of anxiety disorders in 1000s, with 95% uncertainty intervals, by location, for the year 2020

Table S10: Meta-regression coefficients from initial and final prevalence-adjustment models for MDD and anxiety disorders

Table S11: Leave-one-country-out cross-validation analysis results

**Section 1. Statement of GATHER compliance**

This study complies with the Guidelines for Accurate and Transparent Health Estimates Reporting (GATHER) recommendations (Table S1, pp 26-27).

## Section 2. Search strategy for data sources reporting the prevalence of depressive and anxiety disorders during the COVID-19 pandemic

### Section 2.1. Pubmed

("Mental health"[Title/Abstract] OR "Mental disorders"[Title/Abstract] OR "Anxiety Disorders"[MeSH Terms] OR "Depressive Disorder"[MeSH Major Topic] OR "anxiety"[Title/Abstract] OR "depress\*"[Title/Abstract] OR "Mental disorder"[Title/Abstract] OR "psycholog\*"[Title/Abstract]) AND ("novel coronavirus"[Title/Abstract] OR "COVID"[Title/Abstract] OR "covid-19"[Title/Abstract] OR "covid-19"[Title/Abstract] OR "covid19"[Title/Abstract] OR "nCoV"[Title/Abstract] OR "novel CoV"[Title/Abstract] OR "2019nCoV"[Title/Abstract] OR "Coronavirus"[Title/Abstract] OR "coronavi\*"[Title/Abstract] OR "SARS-COV-2"[Title/Abstract] OR "SARSCoV2"[Title/Abstract] OR "SARS CoV2"[Title/Abstract] OR "outbreak"[Title/Abstract] OR "epidemic"[Title/Abstract] OR "pandemic"[Title/Abstract] OR "Coronavirus"[MeSH Terms] OR "covid-19"[Supplementary Concept] OR "Pandemics"[MeSH Terms] OR "severe acute respiratory syndrome coronavirus 2"[Supplementary Concept] OR "covid-19"[Supplementary Concept]) AND (("prevalen\*"[Title/Abstract] OR "Prevalence"[MeSH Terms] OR "impact"[Title/Abstract] OR "effect"[Title/Abstract] OR "outcome"[Title/Abstract] OR "percentage"[Title/Abstract]) Filters: Publication date from 2020/01/01

### Section 2.2. MedRxiv

"mental health" "mental disorder" anxiety depression depressive psychological" (match whole any)  
Full text or abstract or title in MedRxiv only posted between "01 Jan, 2020 and 31 Dec, 2020"

### Section 2.3. PsyArXiv

("novel coronavirus" OR "COVID" OR "covid 19" OR covid-19 OR "covid19" OR "nCoV" OR "novel CoV" OR "2019nCoV" OR "Coronavirus" OR Coronavi\* OR SARS-COV-2 OR "SARSCoV2" OR "outbreak" OR "epidemic" OR "pandemic") AND ("mental health" OR "mental disorder" OR anxiety OR depression OR depress\* OR psychology\*) AND (prevalen\* OR impact OR effect OR outcome OR percentage)

### Section 2.4. COVID-19 databases

A number of COVID-19 databases were searched on a regular basis using relevant filters. The databases and filters used include:

- COVID-19: living map of the evidence by Eppi-centre: Studies included in the database were filtered by "mental health impacts".
- The DEPRESSD Project: References identified from research question 2 "Factors Associated with Levels or Changes in Symptoms".
- The Neurology and Neuropsychiatry of COVID-19 Blog: Results in this database were filtered by the groups "DATA PAPERS: Psychiatric", "REVIEWS, EDITORIALS AND POSITION PAPERS: Systematic reviews/meta-analyses", and "REVIEWS, EDITORIALS AND POSITION PAPERS: Psychiatry"
- WHO-COVID-19: Results in this database were filtered by the topic "mental health".
- COVID-minds: Lists studies currently in the field which assess the impact of COVID on mental health. Studies were reviewed on a regular basis to check if results are available.
- Researchgate: Studies within the COVID group were filtered by psychological impact.

### Section 2.5. Google Scholar

Google Scholar was used to source grey literature and baseline data (i.e., pre-covid data). For grey literature, a combination of keywords were used in English and Spanish including : ("mental health" OR "anxiety" OR "depression") AND "covid-19" ( i.e., Spanish equivalent ("salud mental" O "ansiedad" O "depression") Y "covid-19").

For baseline data, a combination of location, parameter, disorder, mental health instrument, and or sample type-specific keywords were used, restricting publication year from 2013 to 2020. For example, the search for baseline data on depression estimates measured with the Patient Health Questionnaire (PHQ-9) in Ireland included:

- Location-specific terms: ("Ireland", OR "Irish"), AND
- Parameter-specific terms: "prevalence", AND
- Disorder-specific terms: ("depression" OR "depressed" OR "anxiety"), AND
- Instrument-specific terms: "PHQ", AND
- Sample type: ("representative" OR "survey")

## **Section 3. Supplementary methods for the development of the model to predict change in prevalence of depressive and anxiety disorders**

### **Section 3.1. Case definition**

To ensure comparability in measurement, we followed case definitions for major depressive disorder (MDD) and anxiety disorders used within the Global Burden of Diseases, Injuries, and Risk Factors Study (GBD). These definitions adhere to criteria presented in Diagnostic and Statistical Manual of Mental Disorders (DSM-IV-TR) and the International Classification of Diseases and Related Health Problems (ICD-10).<sup>1,2</sup> In summary, MDD involves the presence of at least one major depressive episode, which is the experience of either depressed mood or loss of interest/pleasure, for most of every day, for at least two weeks (DSM-IV-TR: 296.21–24, 296.31–34; ICD-10: F32.0–9, F33.0–9). Anxiety disorders involves experiences of intense fear and distress, typically in combination with other physiological symptoms. In GBD, anxiety disorders are modelled as a single cause for “any” anxiety disorder to avoid the double-counting of individuals meeting criteria for more than one anxiety disorder (DSM-IV-TR: 300.0-300.3, 208.3, 309.21, 309.81; ICD-10: F40-42, F43.0, F43.1, F93.0-93.2, F93.8)

### **Section 3.2. Data preparation and model specifications**

We developed models to estimate the change in prevalence of major depressive disorder (MDD) and anxiety disorders with the intention to use this model to adjust the prevalences of MDD and anxiety disorder estimated by DisMod-MR 2.1 (which represent the pre-pandemic prevalences). Models were run separately for MDD and anxiety disorders. We conducted meta-regressions via meta-regression: Bayesian, regularised, trimmed<sup>3</sup> (MR-BRT) on the difference between the logit disorder prevalence during the COVID-19 pandemic and prior to the pandemic. The difference in logit prevalence was chosen to ensure any adjusted prevalence estimate would be restricted between 0 and 1.

Three COVID-19 impact indicators were tested as independent variables: Human mobility, daily COVID-19 infection rate, and daily excess mortality rate. For each COVID-19 impact indicator, the average daily estimate between the start date of the survey minus the recall period of the assessment tool and the end date of the survey was calculated and assigned to each estimate informing the model. For example, Peters and colleagues<sup>4</sup> used the PHQ-9 to assess prevalence in Germany between April 16, 2020, and May 29, 2020. The PHQ-9 has a recall of 14 days, and so the average daily estimate of the COVID-19 impact indicators in Germany between April 2, 2020, and May 29, 2020, was calculated and assigned to this estimate. COVID-19 daily infections and excess mortality were extremely positively skewed, and so we corrected this via a square-root transformation. This transformation was also important for the extrapolation of prevalence change along these impact indicators as a adjustments along a severely skewed index would have led to undesirable outliers post-estimation. We also tested a logarithmic transformation but this resulted in a substantial negative skew and so was not considered further (Figure S7 & Figure S8).

Potential bias covariates flagged cross-sectional comparisons informed by random samples, longitudinal comparisons informed by market research / quota samples, cross-sectional comparisons informed by market research / quota samples, and estimates representing combined symptoms of depressive and anxiety disorders (eg, K6<sup>5</sup>) (see Table S4 for reasons for potential bias). As only three studies used diagnostic instruments to measure prevalence, we did not have sufficient data to explore the impact of a bias covariate on data from screening scales identifying probable cases of depressive or anxiety disorders (Appendix, Section 4). Age, sex, and most bias covariates were also included as effect modifiers to ensure that the prevalence change remained zero when the COVID-19 impact was zero. The exception was the bias covariate for cross-sectional comparisons informed by market research / quota samples, which had random sample pre-pandemic baselines and therefore had a prevalence difference even when the impact indicator was zero.

Sex was quantified by the percentage female of the sample and was centered at 50% female. Age was quantified as the mean age of the sample (where available) or the midpoint of the age range of the study sample (when mean-age was not available) and was mean-centered at 49.1 years. Where reported, the most detailed data by age and sex were extracted and included in the model. For studies that reported age-specific and sex-specific prevalence, but not age-sex-specific prevalence,

we conducted a standard GBD data preparation process called “age and sex splitting”. This process involves estimating the within-study sex ratio and adjusting the age-specific data accordingly to estimate age-sex-specific estimates from the study.

Each unique sample was given a random intercept and random effects were placed on the COVID-19 impact indicators. Models were run separately for MDD and anxiety disorders. Disorder-specific estimates were included in their respective models, and estimates representing combined depressive and anxiety disorder symptoms were included in both models, with their respective bias covariate. We specified 5% data trimming to robustify the models against outliers. Trimming within MR-BRT seeks to fit a specified majority of the most self-coherent data, giving an understanding of the overall relationship in the face of outlying observations. MR-BRT classifies observations into (majority) inliers and (minority) outliers, while simultaneously fitting the model with respect to which this classification is made.<sup>3,6</sup>

Due to the strong collinearity between the COVID-19 impact indicators, and the need for age, sex, and bias covariates to be treated as effect modifiers on the impact indicators, we developed prevalence adjustment models via a two-step process. First, we conducted indicator models to develop an index for the COVID-19 impact based on the COVID-19 impact indicators. Human mobility, daily COVID-19 infection rate, and daily excess mortality rate were included in a meta-regression on the change in logit prevalence to quantify their independent impact on the prevalence change. Following this, the coefficients from these models were used to calculate a single COVID-19 impact indicator for each disorder. Then a final model for each disorder was developed via backward elimination to regress this indicator, age, sex, and the bias covariates on the change in logit prevalence. The least significant covariate was iteratively removed until no improvement was seen in the Akaike information criterion. Initial and final model results are presented in Table S10. We also conducted a leave-one-country-out cross-validation analysis to explore the generalizability of the model to locations missing data detailed in Section 6.

### **Section 3.3. The inclusion and utility of market research / quota sampling studies**

The inclusion of market research / quota samples was necessary in the development of our prevalence-adjustment models due to the very limited data available derived from random samples. In total, 66% of data sources informing the final MDD model ( $n = 27$ ) and 52% of the data sources informing the final anxiety disorders model ( $n = 13$ ) were from market research / quota samples and so the available data would be substantially limited if these estimates were excluded. These estimates also increased geographical coverage of the data, adding six additional countries for MDD (Japan, Czechia, Austria, Denmark, France, and Ireland), and four additional countries for anxiety disorders (USA, Japan, Czechia, and France). We did not observe a significant bias in the longitudinal market research / quota samples. Bias was only observed in cross-sectional comparisons between market research / quota samples and a pre-COVID-19 random sample (Table S10). This suggests a baseline bias in market research / quota samples and not a bias in prevalence change within these samples. We believe including a covariate for cross-sectional market research / quota samples was the best approach to accommodate this bias, and increase data richness and geographical coverage.



## Section 4. Symptom scales vs diagnostic instruments

Our prevalence-adjustment regression model was primarily informed by studies measuring change in probable depressive or anxiety disorders using symptom scales. In an ideal scenario, we would have sourced enough estimates using diagnostic instruments to diagnose cases of MDD and anxiety disorders to adequately capture any systematic differences between change in prevalence of MDD and anxiety disorders vs change in prevalence of probable depressive or anxiety disorders via a covariate. Unfortunately, our systematic review only revealed three studies meeting our inclusion criteria that used diagnostic instruments to diagnose cases of MDD or anxiety disorders. This meant it was not feasible to include a covariate to differentiate between diagnostic instruments and symptom scales. This was especially challenging given the change in prevalence was also expected to vary by age, sex, bias covariates, and the impact of COVID-19.

In The GBD Study, symptom scales are used as a proxy for prevalence of MDD. For these symptom scale estimates, a bias correction is conducted to adjust these estimates to the level they would have been had the study used a diagnostic instrument. This bias correction represents the predictive validity of these symptom scales to MDD prevalence.

For the current analysis, we assumed that the assumption that the predictive validity (and in turn, the bias correction) of these symptom scales to MDD and anxiety disorders remained the same between pre-pandemic and mid-pandemic. If this assumption is true, then the change in probable depressive or anxiety disorder prevalence is equal to the change in MDD and anxiety disorder prevalence. For example, we can assume that disorder prevalence is a function of probable disorder prevalence from a symptom scale and the predictive validity of the symptom scale:

$$D = P \times V$$

where  $D$  represents the disorder prevalence,  $P$  represents the probable disorder prevalence from the symptom scale, and  $V$  represents the predictive validity of that symptom scale. If  $V$  is constant, then the change in prevalence is equal between probable disorder prevalence from the symptom scale and disorder prevalence from the diagnostic instrument:

$$\text{Change} = \frac{P_{\text{pandemic}} \times V}{P_{\text{baseline}} \times V} = \frac{P_{\text{pandemic}}}{P_{\text{baseline}}} = \frac{D_{\text{pandemic}}}{D_{\text{baseline}}}$$

However, it is possible that the assumption that  $V$  remains unchanged between pre-pandemic and mid-pandemic does not always hold true. For example, high scores on anxiety disorder symptom scales may reflect a natural psychological reaction to a perceived threat (i.e., the COVID-19 pandemic) rather than a probable anxiety disorder. At the time of publication, there was not enough data available to evaluate this.

Of the three studies using diagnostic measures, two showed substantial increases in disorder prevalence. Ayuso-Mateos et al<sup>7</sup> reported a mid-pandemic MDD point prevalence of 9.8% ( $SE = 1.2\%$ ) vs a pre-pandemic 1-year recall prevalence of 7.8% ( $SE = 0.8\%$ ) using the CIDI within a longitudinal random sample. After adjusting the pre-pandemic estimate to reflect point-prevalence using the MDD year-to-point recall adjustment of 2.0 ( $SE = 1.0$ ) used in for GBD 2020, the estimated pre-pandemic point prevalence of MDD was 3.9% ( $SE = 2.0\%$ , up 50.5%). Winkler and colleagues<sup>8</sup> reported a MDD prevalence of 11.8% ( $SE = 0.6\%$ ) during the COVID-19 pandemic vs a pre-pandemic estimate of 4.0% ( $SE = 0.3\%$ , up 197.2%). For anxiety disorders, they reported a prevalence of 12.8% ( $SE = 0.6\%$ ) vs a pre-pandemic estimate of 7.8% ( $SE = 0.4\%$ , up 64.8%). However these estimates were within a market research / quota sample and likely over-estimated the increase in prevalence.

The third study conducted by Knudsen and colleagues<sup>9</sup> reported prevalence of MDD and anxiety disorders using the CIDI on random samples in Norway across three time points, March to May 2020, June to July 2020, and August to September 2020. Compared to their pre-pandemic baseline MDD prevalence of 2.7% ( $SE = 0.7\%$ ), they reported MDD prevalences of 1.7% ( $SE = 0.5\%$ , down 37.0%), 1.3% ( $SE = 0.5\%$ , down 51.9%), and 4.6% ( $SE = 1.1\%$ , up 70.3%) across the three time points respectively. Compared to their pre-pandemic baseline anxiety disorder prevalence of 10.4% ( $SE = 1.4\%$ ), they reported anxiety disorder prevalences of 6.1% ( $SE = 0.9\%$ , down 41.3%), 8.2% ( $SE = 0.9\%$ , down 21.2%), and 7.8% ( $SE = 1.4\%$ , down 25.0%) across the three time points respectively. There are three limitations to this study that warrants mention. First, the samples at baseline and each time point are very small, ranging between 372 and 691. Second, the authors also reported that the shift from face-to-face to telephone survey administration occurred at the onset of the pandemic, which may have

impacted on interviewers' ability to identify mental disorders, especially in the early stages of this shift when they were less experienced with telephone survey administration. Third, the baseline estimates from this study may have been abnormally elevated. A recent analysis of GP visits in Norway by Hvide and Johnsen showed abnormally high GP visits related to mental health in January and February of 2020 compared to previous years.<sup>10</sup> Hvide and Johnsen suggest this may have been due to abnormally poor weather, with January being the wettest January ever recorded in Norway.<sup>11</sup> Additionally, a discussion of this finding with Norwegian GBD collaborators raised the fact that a prominent figure in the Norwegian community passed away end of December 2019 and the circumstances were related to mental health. National coverage of this death may have impacted the mental health of the community.<sup>12</sup> This has yet to be substantiated with epidemiological data.

## Section 5. Selection of COVID-19 impact indicators

We required indicators of the impact of the COVID-19 pandemic that had an association with depressive and anxiety disorder prevalence, referred to hereafter as COVID-19 impact indicators. The risk factor of interest was the COVID-19 pandemic, with the COVID-19 impact indicators acting as proxies for the impact of COVID-19 in the population. A COVID-19 impact indicator had to: a) capture an impact of COVID-19, b) be consistently measured across countries, and c) be consistently measured with sufficient granularity across time (preferably daily or weekly), over the course of the pandemic. We considered two potential indicators relevant to past shocks (eg, epidemics, financial crises): change in unemployment status and real gross domestic product (GDP);<sup>13-17</sup> and three novel indicators unique to the COVID-19 pandemic but without established relationships with mental health: human mobility,<sup>18</sup> estimated total (as opposed to reported) COVID-19 daily infection rate,<sup>19</sup> and estimated daily excess mortality rate during the pandemic (including excess deaths not reported as due to COVID-19).<sup>20</sup>

Whilst there is clear evidence on the relationship between change in unemployment status or GDP and mental health, these two indicators may not best reflect the unprecedented scale and breadth of the COVID-19 response. They failed to capture the mitigating impact of government involvement and unrelated changes in individual behaviour due to the pandemic (eg, lockdown and social distancing). Furthermore, these indicators lacked consistency across countries and temporal granularity across the pandemic (eg, GDP often reported quarterly). The daily excess mortality rate and infection rate were considered direct measures of the course of the COVID-19 pandemic. These were chosen over reported infections and deaths to reported infections and deaths as better proxies of the overall impact of the pandemic. We did not intend for the change in prevalence of MDD and anxiety disorders to be reactive to reported numbers. The prevalence change was expected to be due to the overall impact of the pandemic on the population, with estimated infections and excess mortality as proxies to this impact. We suspect using reported estimates would likely underestimate the prevalence change for locations where official reporting of cases and deaths have not been adequate.

However, these indicators hide the impacts in countries that have lower case-fatality rates due to health systems in place, or implemented strong lockdown mandates stopping transmission and mortality but still impacting wellbeing in the community and the local economy. Human mobility potentially reflects impacts of the COVID-19 pandemic manifested through reductions in movement due to 1) lockdown mandates, 2) social withdrawal from fear or anxiety within communities, especially where community infection is rampant, and 3) economic factors such as unemployment and reduced business activity.

The estimation of human mobility, COVID-19 daily infection rate, and daily excess mortality rate was conducted by the IHME COVID-19 Forecasting Team and is described in detail elsewhere.<sup>18</sup> In summary, human mobility was represented by a composite human mobility index representing daily change from pre-pandemic mobility. Data from mobile phone users provided by Facebook, Google, Descartes Labs, Safegraph, and Baidu, and data on social distancing mandates informed a Gaussian process regression to estimate a time series for human mobility. COVID-19 daily infection and excess mortality rates were estimated via a deterministic SEIR (susceptible, exposed, infectious, and recovered) compartmental framework and was informed by daily confirmed COVID-19 cases, deaths, tests conducted, antibody seroprevalence, human mobility, social distancing mandates, pneumonia seasonality, mask use, and vaccine coverage.<sup>19,20</sup>

## Section 6. Leave-one-country-out cross-validation analysis

We conducted a leave-one-country-out cross-validation (LOCOCV) analysis to evaluate the generalisability of our prevalence-adjustment models towards countries not informing our models. For each country, we re-ran our MDD and anxiety disorder prevalence-adjustment models without data for that country. We then used these models to predict the change in logit prevalence (the dependent variable of the models) for the missing data, and crosschecked whether the data fell within the bounds of prediction intervals of our models. We also calculated the country-level root mean squared error (RMSE) and compared this against a benchmark model without the COVID-19 impact indicator index or its effect modifiers. Instead, the benchmark model contained a non-zero intercept, linear time trend between baseline and mid-pandemic estimate, and bias covariates flagged as significant in the original prevalence-adjustment models. In the absence of the indicators in the benchmark models, bias covariates were included as dichotomous variables.

We also compared the mean country-level RMSE between the prevalence-adjustment model and the benchmark model. However, USA and UK contributed a substantial amount of data for both MDD and anxiety disorders prevalence-adjustment models. Removing the data from these countries resulted in a substantially reduced dataset and therefore these countries were a priori expected to perform poorly in the LOCOCV. For MDD, the USA contributed 22% of estimates and 29% of data sources, and the UK contributed 22% of estimates and 21% of data sources. Likewise for anxiety disorders, the USA contributed 23% of estimates and 27% of data sources, and the UK contributed 21% of estimates and 15% of data sources. We therefore also compared the country-level RMSE between the prevalence-adjustment model and the benchmark model after excluding the RMSE for USA and UK.

For MDD, only three of the 209 estimates informing the model were outside of the prediction intervals (Table S11). Two estimates were cross-sectional market research / quota sampling studies with small samples ( $n \sim 1000$ ) from Denmark, and the third was a very small sample ( $n < 500$ ) from UK. A scatter between observed estimates against estimates predicted by the LOCOCV analysis is presented in Figure S9. The RMSE of the MDD prevalence-adjustment model was superior to the benchmark model for all countries with the exception of Austria, Czechia, New Zealand, UK, and USA. USA and UK were again a priori expected to perform poorly. Twelve of the 14 estimates from Czechia ( $M = -1.17$ ), Austria ( $M = -1.31$ ), and New Zealand ( $M = -1.16$ ) were derived from cross-sectional market research / quota samples and these estimates were very close to the mean for studies flagged on this bias covariate ( $M = -1.18$ ), which is likely why a non-zero intercept model with binary bias covariates performed well for these locations. The mean country-level RMSE was 0.53 for the prevalence-adjustment model compared 0.55 for the benchmark model. However, the mean country-level RMSE was 0.50 for the prevalence-adjustment model and 0.54 for the benchmark model after excluding the RMSE for USA and UK.

All 141 estimates informing the anxiety disorders model fell within the prediction intervals generated as part of the LOCOCV analysis. A scatter between observed estimates against estimates predicted by the LOCOCV analysis is presented in Figure S10. The RMSE of the anxiety prevalence-adjustment model was superior to the benchmark model for all countries with the exception of Australia, New Zealand, UK, and USA. Again, USA and UK were a priori expected to perform poorly due to large reduction in estimates informing the prevalence-adjustment model when data from these countries were removed. The six estimates from Australia represented change in combined depressive and anxiety disorder symptoms derived from random samples, and the average of these estimates ( $M = -0.31$ ) was very close to the average of estimates of this type ( $M = -0.33$ ). For new Zealand, seven of the nine estimates represented change in combined depressive and anxiety disorder symptoms derived from cross-sectional market-research / quota samples and their average ( $M = -1.16$ ) was very close to the average of these types of estimates ( $M = -1.21$ ). This again was likely why a non-zero intercept model with binary bias covariates performed well for these locations. Again, the mean country-level RMSE for the prevalence-adjustment model was 0.54 compared to 0.61 for the benchmark model. After excluding the USA and the UK, the mean country-level RMSE was 0.48 for the prevalence-adjustment model and 0.62 for the benchmark model.

## Section 7. References

### References

1. American Psychiatric Association. Diagnostic and statistical manual of mental disorders : DSM-IV-TR. 4th ed., text revision. ed. Washington, DC: American Psychiatric Association; 2000.
2. World Health Organization. The ICD-10 classification of mental and behavioural disorders : clinical descriptions and diagnostic guidelines. Geneva: World Health Organization; 1992.
3. Zheng P, Barber R, Sorensen RJD, Murray CJL, Aravkin AY. Trimmed Constrained Mixed Effects Models: Formulations and Algorithms. *Journal of Computational and Graphical Statistics* 2021; 1-13.
4. Peters A, Rospleszcz S, Greiser KH, Dallavalle M, Berger K. The Impact of the COVID-19 Pandemic on Self-Reported Health. *Deutsches Arzteblatt international* 2020; **117**(50): 861-7.
5. Kessler RC, Barker PR, Colpe LJ, et al. Screening for Serious Mental Illness in the General Population. *Archives of General Psychiatry* 2003; **60**(2): 184-9.
6. Aravkin A, Davis D. Trimmed Statistical Estimation via Variance Reduction. *Mathematics of Operations Research* 2019; **45**(1): 292-322.
7. Ayuso-Mateos JL, Morillo D, Haro JM, Olaya B, Lara E, Miret M. Changes in depression and suicidal ideation under severe lockdown restrictions during the first wave of the COVID-19 pandemic in Spain: a longitudinal study in the general population. *Epidemiology and Psychiatric Sciences* 2021; **30**(e49).
8. Winkler P, Formanek T, Mlada K, et al. Increase in prevalence of current mental disorders in the context of COVID-19: analysis of repeated nationwide cross-sectional surveys. *Epidemiol Psychiatr Sci* 2020; **29**: e173.
9. Knudsen AKS, Stene-Larsen K, Gustavson K, et al. Prevalence of mental disorders, suicidal ideation and suicides in the general population before and during the COVID-19 pandemic in Norway: A population-based repeated cross-sectional analysis. *The Lancet Regional Health - Europe* 2021; **4**.
10. Hvide H, Johnsen JV. COVID-19 and mental health: A longitudinal population study through 2020. 2021. <https://voxeu.org/article/covid-19-and-mental-health-evidence-norway> (accessed 12th August 2021).
11. Meteorologisk institutt. Januar 2020 ble den våteste noen gang. 2020. <https://kommunikasjon.ntb.no/pressemelding/januar-2020-ble-den-vateste-noen-gang?publisherId=17846853&releaseId=17878908> (accessed 12th August 2021).
12. Niederkrotenthaler T, Braun M, Pirkis J, et al. Association between suicide reporting in the media and suicide: systematic review and meta-analysis. *BMJ* 2020; **368**: m575.
13. Christodoulou NG, Christodoulou GN. Financial Crises: Impact on Mental Health and Suggested Responses. *Psychotherapy and Psychosomatics* 2013; **82**(5): 279-84.
14. Frasquilho D, Matos MG, Salonna F, et al. Mental health outcomes in times of economic recession: a systematic literature review. *BMC Public Health* 2016; **16**(1): 115.
15. Marazziti D, Avella MT, Mucci N, et al. Impact of economic crisis on mental health: a 10-year challenge. *CNS Spectr* 2021; **26**(1): 7-13.
16. World Health Organization. Impact of economic crises on mental health. Geneva: World Health Organization, 2011.
17. Jahoda M. Economic Recession and Mental Health: Some Conceptual Issues. *Journal of Social Issues* 1988; **44**(4): 13-23.

18. IHME COVID-19 Forecasting Team. Modeling COVID-19 scenarios for the United States. *Nat Med* 2021; **27**(1): 94-105.
19. [COVID-19 Cumulative Infection Collaborators]. Estimating global, regional and national daily and cumulative infections with COVID-19: a modelling study. *The Lancet In prep*.
20. [COVID-19 Excess Mortality Collaborators]. Estimating the total number of deaths due to SARS-CoV-2 infection: a systematic analysis of total COVID-19 mortality between January 2020 and August 2021. *The Lancet In Prep*.
21. Biddle N, Edwards B, Gray M, Sollis K. Hardship, distress, and resilience: The initial impacts of COVID-19 in Australia: Australian National University. Centre for Social Research and Methods, 2020.
22. Bulbulia JA, Piven SD, Barlow FK, et al. National Longitudinal Mediators of Psychological Distress During Stringent COVID-19 Lockdown. *medRxiv* 2020: 2020.09.15.20194829.
23. Daly M, Sutin A, Robinson E. Longitudinal changes in mental health and the COVID-19 pandemic: Evidence from the UK Household Longitudinal Study. *Psychological Medicine* 2020; **13**: 1-10.
24. Katz B, Yovel I. Mood Symptoms Predict COVID-19 Pandemic Distress but not Vice Versa: An 18-Month Longitudinal Study. *PsyArXiv* 2020.
25. Kikuchi H, Machida M, Nakamura I, et al. Changes in Psychological Distress during the COVID-19 Pandemic in Japan: a Longitudinal Study. *J Epidemiol* 2020; **30**(11): 522-8.
26. Kwong ASF, Pearson RM, Adams MJ, et al. Mental health before and during the COVID-19 pandemic in two longitudinal UK population cohorts. *Br J Psychiatry* 2020; **24**: 1-10.
27. Marroquin B, Vine V, Morgan R. Mental health during the COVID-19 pandemic: Effects of stay-at-home policies, social distancing behavior, and social resources. *Psychiatry Res* 2020; **293**: 113419.
28. van der Velden PG, Contino C, Das M, van Loon P, Bosmans MWG. Anxiety and depression symptoms, and lack of emotional support among the general population before and during the COVID-19 pandemic. A prospective national study on prevalence and risk factors. *Journal of Affective Disorders* 2020; **277**: 540-8.
29. Vizard T, Davis J, White E, Beynon B. Coronavirus and depression in adults, Great Britain: June 2020. 2020.  
<https://www.ons.gov.uk/peoplepopulationandcommunity/wellbeing/articles/coronavirusanddepressioninadultsgreatbritain/june2020#measuring-the-data>.
30. Wanberg CR, Csillag B, Douglass RP, Zhou L, Pollard MS. Socioeconomic status and well-being during COVID-19: A resource-based examination. *J Appl Psychol* 2020; **105**(12): 1382-96.
31. Widnall E, Winstone L, Mars B, Haworth C, Kidger J. Young People's Mental Health during the COVID-19 Pandemic: Initial findings from a secondary school survey study in South West England: NIHR School for Public Health Research, 2020.
32. Zhang L, Zhang D, Fang J, Wan Y, Tao F, Sun YJJNO. Assessment of Mental Health of Chinese Primary School Students Before and After School Closing and Opening During the COVID-19 Pandemic. *JAMA Netw Open* 2020; **3**(9): e2021482.
33. Australian Bureau of Statistics. Household Impacts of COVID-19 Survey, 2020.
34. Australian Bureau of Statistics. Australia National Health Survey 2017-2018.
35. Bryan C, Bryan AO, Baker JC. Associations among state-level physical distancing measures and suicidal thoughts and behaviors among U.S. adults during the early COVID-19 pandemic. *Suicide Life Threat Behav* 2020; **50**(6): 1223-9.

36. National Center for Health Statistics. Centers for Disease Control and Prevention. United States National Health and Nutrition Examination Survey 2017-2018.
37. Choi EPH, Hui BPH, Wan EYF. Depression and anxiety in Hong Kong during COVID-19. *International journal of environmental research public health* 2020; **17**(10): 3740.
38. Ni MY, Li TK, Pang H, et al. Direct participation in and indirect exposure to the Occupy Central Movement and depressive symptoms: a longitudinal study of Hong Kong adults. *American journal of epidemiology* 2016; **184**(9): 636-43.
39. Lau JTF, Kim Y, Wu AMS, Wang Z, Huang B, Mo PKH. The Occupy Central (Umbrella) movement and mental health distress in the Hong Kong general public: political movements and concerns as potential structural risk factors of population mental health. *Soc Psychiatry Psychiatr Epidemiol* 2017; **52**(5): 525-36.
40. Daly M, MacLachlan M, Maguire R, et al. Changes in PTSD, depression, and generalized anxiety before and during the COVID-19 pandemic in the Republic of Ireland. *Journal of Affective Disorders Reports* 2020; **5**(100184).
41. Central Statistics Office (Ireland). Ireland Health Survey 2015. Dublin, Ireland.
42. Ettman CK, Abdalla SM, Cohen GH, Sampson L, Vivier PM, Galea S. Prevalence of Depression Symptoms in US Adults Before and During the COVID-19 Pandemic. *JAMA Network Open* 2020; **3**(9): e2019686-e.
43. Every-Palmer S, Jenkins M, Gendall P, et al. Psychological distress, anxiety, family violence, suicidality, and wellbeing in New Zealand during the COVID-19 lockdown: A cross-sectional study. *PLOS ONE* 2020; **15**(11): e0241658.
44. Ministry of Health (New Zealand). New Zealand Health Survey 2019-2020.
45. Fukase Y, Ichikura K, Murase H, Tagaya H. Depression, risk factors, and coping strategies in the context of social dislocations resulting from the second wave of COVID-19 in Japan. *BMC psychiatry* 2021; **21**(1): 33.
46. Ito R SM, Sato K, Kato M, Fujisawa D, Naito A, Morita T, Miyashita M. The nature of QOL and its related factors measured by the question items of the medical treatment behavior survey for the general public in Japan. *Palliative Care Research* 2020; **15**(2).
47. Groarke JM, Berry E, Graham-Wisener L, McKenna-Plumley PE, McGlinchey E, Armour C. Loneliness in the UK during the COVID-19 pandemic: Cross-sectional results from the COVID-19 Psychological Wellbeing Study. *PLoS One* 2020; **15**(9): e0239698.
48. Wilson JM, Lee J, Shook NJ. COVID-19 worries and mental health: the moderating effect of age. *Aging & mental health* 2020: 1-8.
49. Kantor B, Kantor J. Mental health outcomes and associations during the coronavirus disease 2019 pandemic: A cross-sectional survey of the US general population. *Front Psychiatry* 2020; **11**: 569083.
50. Terlizzi EP, MA V. Symptoms of Generalized Anxiety Disorder Among Adults: United States, 2019. NCHS Data Brief, no 378. Hyattsville, MD: National Center for Health Statistics. 2020, 2019.
51. Killgore WDS, Cloonan SA, Taylor EC, Miller MA, Dailey NS. Three months of loneliness during the COVID-19 lockdown. *Psychiatry Res* 2020; **293**: 113392.
52. Kiuchi K, Kishi K, Araki K. A Foundational Assessment of the Effects of the Spread of COVID-19 Virus Infection and Related Activity Restrictions on Mental and Physical Health, Psychological Distress, and Suicidal Ideation in Japan. *Asia Pac J Public Health* 2020; **32**(8): 463-6.
53. Ministry of Health, Labour and Welfare (Japan). Japan Comprehensive Survey of Living Conditions. In: Ministry of Health, Labour and Welfare (Japan), editors.; 2019.

54. McGinty EE, Presskreischer R, Han H, Barry CL. Psychological Distress and Loneliness Reported by US Adults in 2018 and April 2020. *Jama* 2020; **324**(1): 93-4.
55. McGinty EE, Presskreischer R, Anderson KE, Han H, Barry CL. Psychological Distress and COVID-19–Related Stressors Reported in a Longitudinal Cohort of US Adults in April and July 2020. *Jama* 2020.
56. Maxfield M, Pituch KA. COVID-19 worry mental health indicators and preparedness for future care needs across the adult lifespan. *Aging & mental health* 2020: 1-8.
57. O'Connor RC, Wetherall K, Cleare S, et al. Mental health and wellbeing during the COVID-19 pandemic: longitudinal analyses of adults in the UK COVID-19 Mental Health & Wellbeing study. *The British Journal of Psychiatry* 2020: 1-17.
58. Peretti-Watel P, Alleaume C, Leger D, Beck F, Verger P, Group C. Anxiety, depression and sleep problems: a second wave of COVID-19. *Gen Psychiatr* 2020; **33**(5): e100299.
59. Institute for Research and Documentation in Health Economics (IRDES). France Survey of Health and Welfare 2014, 2014.
60. Christoph P, Sanja B, Elke H, Thomas P. Comparing Mental Health during COVID-19 Lockdown and 6 Months Later in Austria: A Longitudinal Study. *Front Psychiatry* 2021; **12**: 625973.
61. Central Statistics Office. Austria Health Survey 2018-2019.
62. Pieh C, Budimir S, Probst T. The effect of age gender income work and physical activity on mental health during coronavirus disease (COVID-19) lockdown in Austria. *J Psychosom Res* 2020; **136**(110186).
63. Pieh C, Budimir S, Delgadillo J, Barkham M, Fontaine JRJ, Probst T. Mental health during COVID-19 lockdown in the United Kingdom. *Psychosomatic Medicine* 2021; **83**(4): 328-37.
64. Sønderskov KM, Dinesen PT, Santini ZI, Østergaard SD. Increased psychological well-being after the apex of the COVID-19 pandemic. *Acta Neuropsychiatrica* 2020; **32**(5): 277-9.
65. Sønderskov KM, Dinesen PT, Santini ZI, Østergaard SD. The depressive state of Denmark during the COVID-19 pandemic. *Acta Neuropsychiatr* 2020; **32**(4): 226-8.
66. Santé publique France. Covid-19: une enquête pour suivre l'évolution des comportements et de la santé mentale pendant l'épidémie. 22 juin 2020. 2020.
67. Shevlin M, McBride O, Murphy J, et al. Anxiety, depression, traumatic stress and COVID-19-related anxiety in the UK general population during the COVID-19 pandemic. *BJPsych open* 2020; **6**(6): e125.
68. Sibley CG, Greaves LM, Satherley N, et al. Effects of the COVID-19 pandemic and nationwide lockdown on trust, attitudes toward government, and well-being. *American Psychologist* 2020; **75**(5): 618-30.
69. Twenge JM, Joiner TE. Mental distress among U.S. adults during the COVID-19 pandemic. *J Clin Psychol* 2020; **76**(12): 2170-82.
70. Ravens-Sieberer U, Kaman A, Erhart M, Devine J, Schlack R, Christiane O. Impact of the COVID-19 pandemic on quality of life and mental health in children and adolescents in Germany. *Eur Child Adolesc Psychiatry* 2021.
71. Ueda M, Stickley A, Sueki H, Matsubayashi T. Mental Health Status of the General Population in Japan during the COVID-19 Pandemic. *Psychiatry and Clinical Neurosciences* 2020; **74**(9): 505-6.
72. Valiente C, Vázquez C, Peinado V, Contreras A, Trucharte A. Estudio nacional representativo de las respuestas de los ciudadanos de España ante la crisis de Covid-19: respuestas psicológicas. 2020.



73. Ministry of Health. Social Services and Equality. National Statistics Institute (Spain). Spain European Health Survey 2014. Madrid, Spain: National Statistics Institute
74. Vieira JB, Pierzchajlo S, Jangard S, Marsh A, Olsson A. Perceived threat and acute anxiety predict increased everyday altruism during the COVID-19 pandemic: PsyArXiv, 2020.
75. Scholten S, Velten J, Margraf J. Mental distress and perceived wealth, justice and freedom across eight countries: The invisible power of the macrosystem. *PloS one* 2018; **13**(5): e0194642.
76. Yamamoto T, Uchiumi C, Suzuki N, Yoshimoto J, Murillo-Rodriguez E. The Psychological Impact of 'Mild Lockdown' in Japan during the COVID-19 Pandemic: A Nationwide Survey under a Declared State of Emergency. *International journal of environmental research and public health* 2020; **17**(24).
77. Zhou Y, MacGeorge EL, Myrick JG. Mental Health and Its Predictors during the Early Months of the COVID-19 Pandemic Experience in the United States. *International journal of environmental research and public health* 2020; **17**(17): 6315.

## Section 8. Figures and tables

Figure S1. Graphical summary of process to estimate prevalence of major depressive disorder and anxiety disorders due to the COVID-19 pandemic

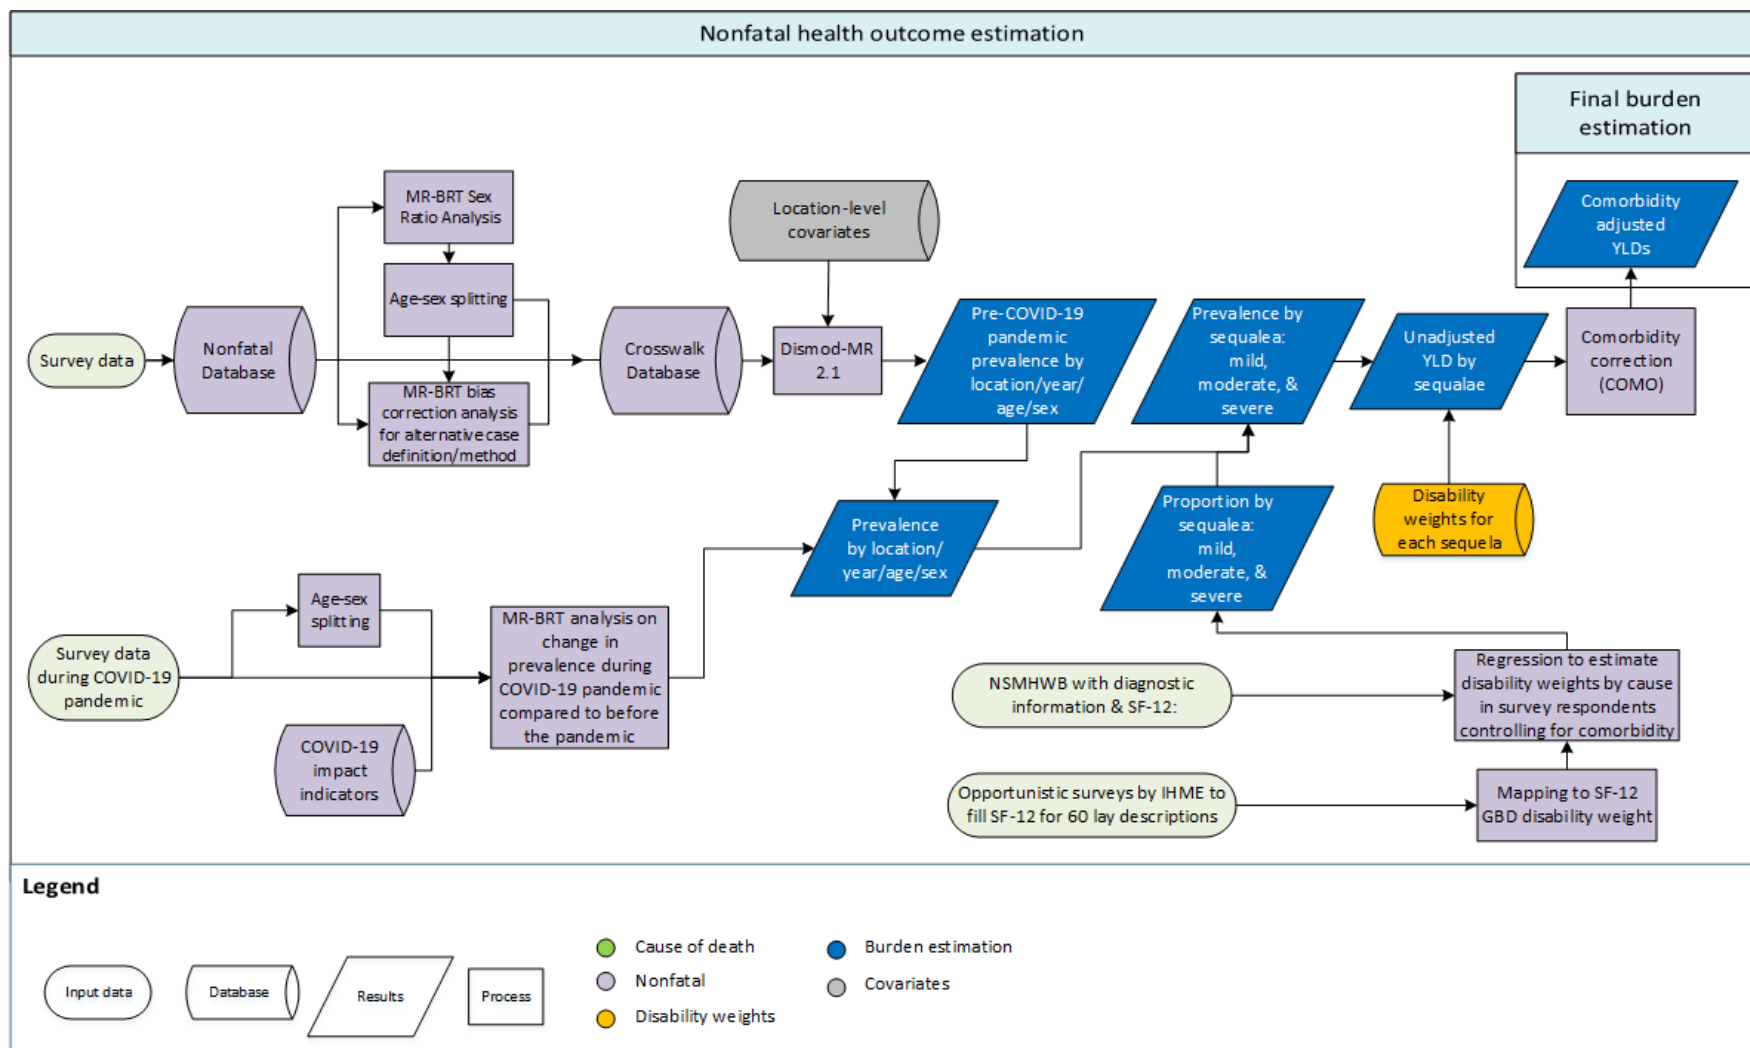

MR-BRT=meta-regression—Bayesian, regularised, trimmed. IHME=Institute for Health Metrics and Evaluation. NSMHWB=Australian National Survey of Mental Health and Wellbeing. GBD=Global Burden of Diseases, Injuries, and Risk Factors Study. YLDs=years lived with disability.

**Figure S2. Applied example (females aged 20-24 in France) of prevalence adjustment for every day of the year 2020.**

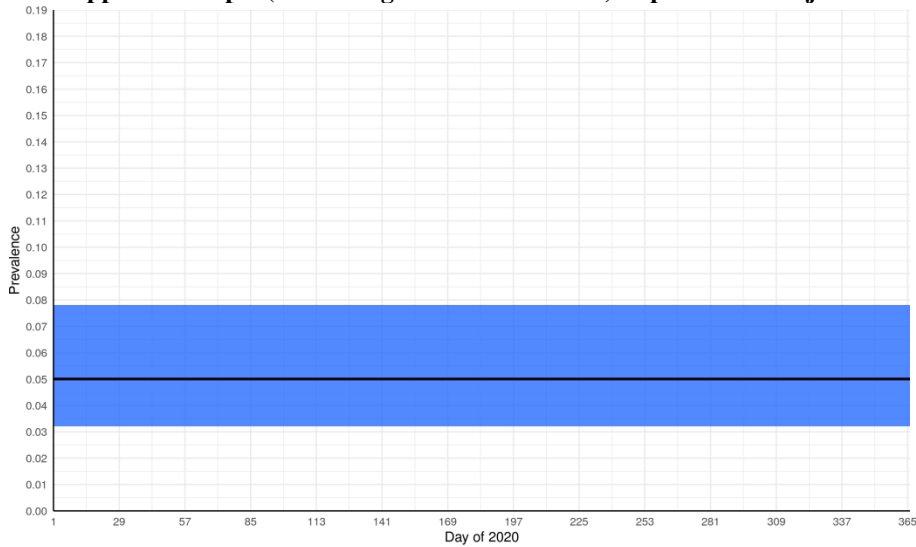

Step 1: Assign pre-COVID-19 prevalence from DisMod-MR 2.1 for every day of the year 2020

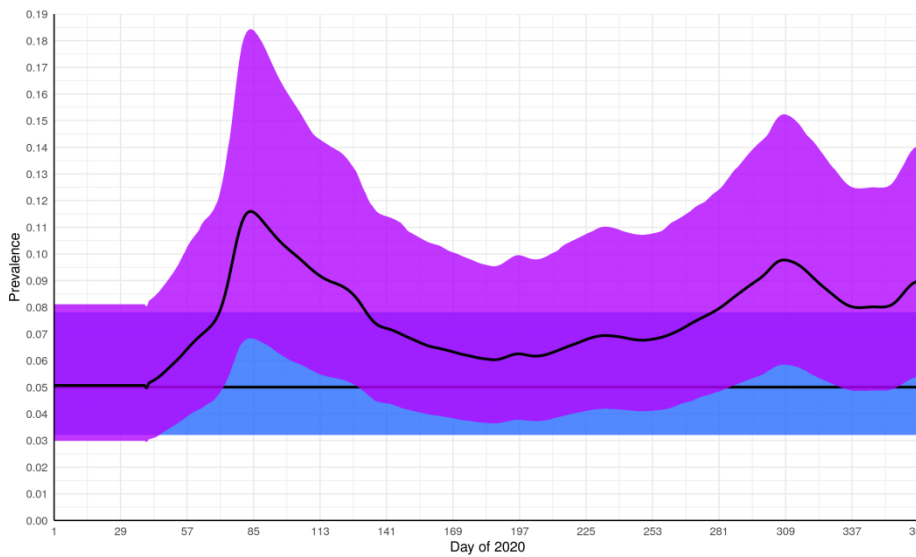

Step 2: Adjust daily prevalence by daily estimates of COVID-19 impact indicators

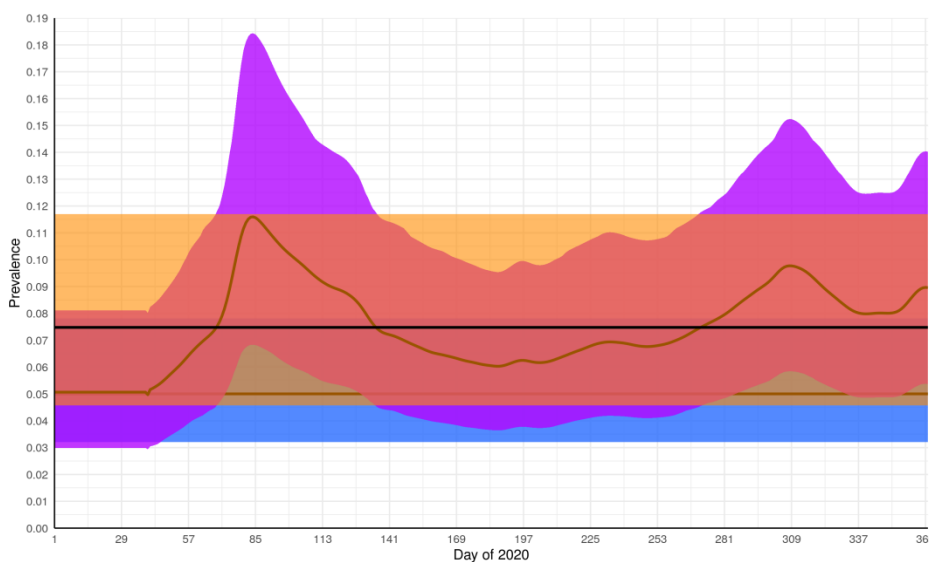

Step 3: Calculate average daily prevalence for the year 2020 as the point prevalence for the year

Solid lines represent prevalence estimates and colour fill represents 95% uncertainty intervals. Blue = Pre-COVID-19 prevalence. Purple = Daily adjusted prevalence. Orange = Prevalence adjusted for COVID-19 pandemic.

**Figure S3. PRISMA flowchart for systematic review of depressive and anxiety disorder prevalence estimates during the COVID-19 pandemic**

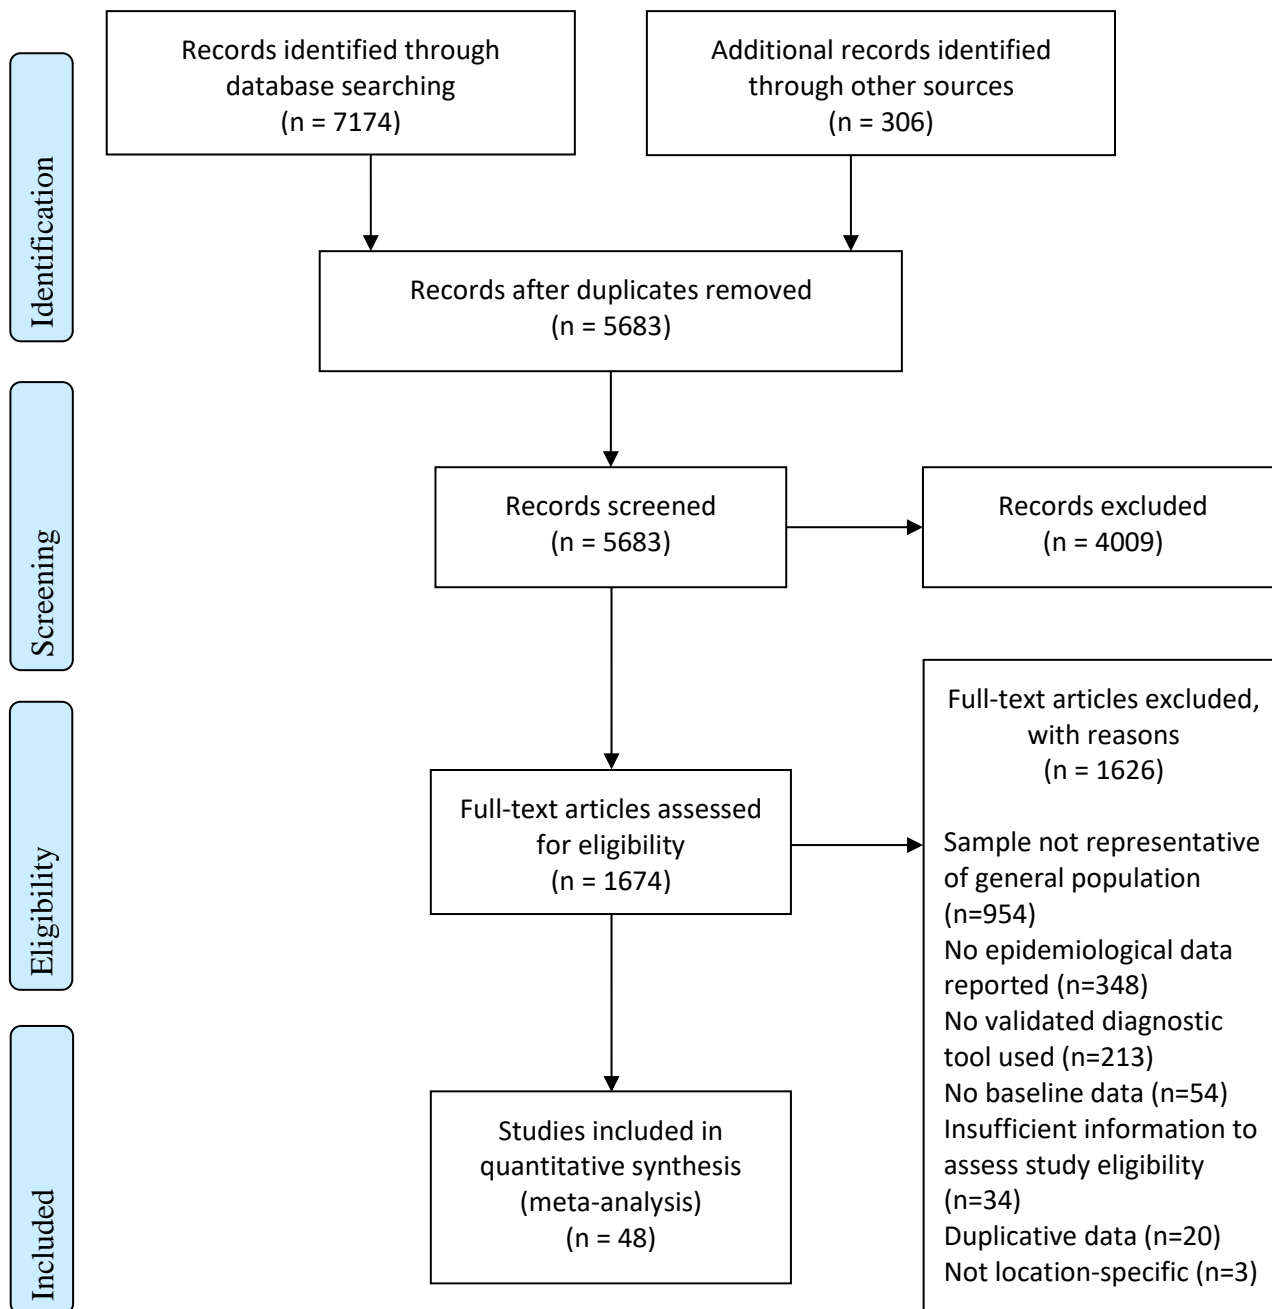

From: Moher D, Liberati A, Tetzlaff J, Altman DG, The PRISMA Group (2009). Preferred Reporting Items for Systematic Reviews and Meta-Analyses: The PRISMA Statement. PLoS Med 6(7): e1000097. doi:10.1371/journal.pmed1000097

For more information, visit [www.prisma-statement.org](http://www.prisma-statement.org).

Figure S4: Number of studies by country informing the meta-regression to estimate change in depressive and anxiety disorder prevalence during the COVID-19 pandemic in 2020

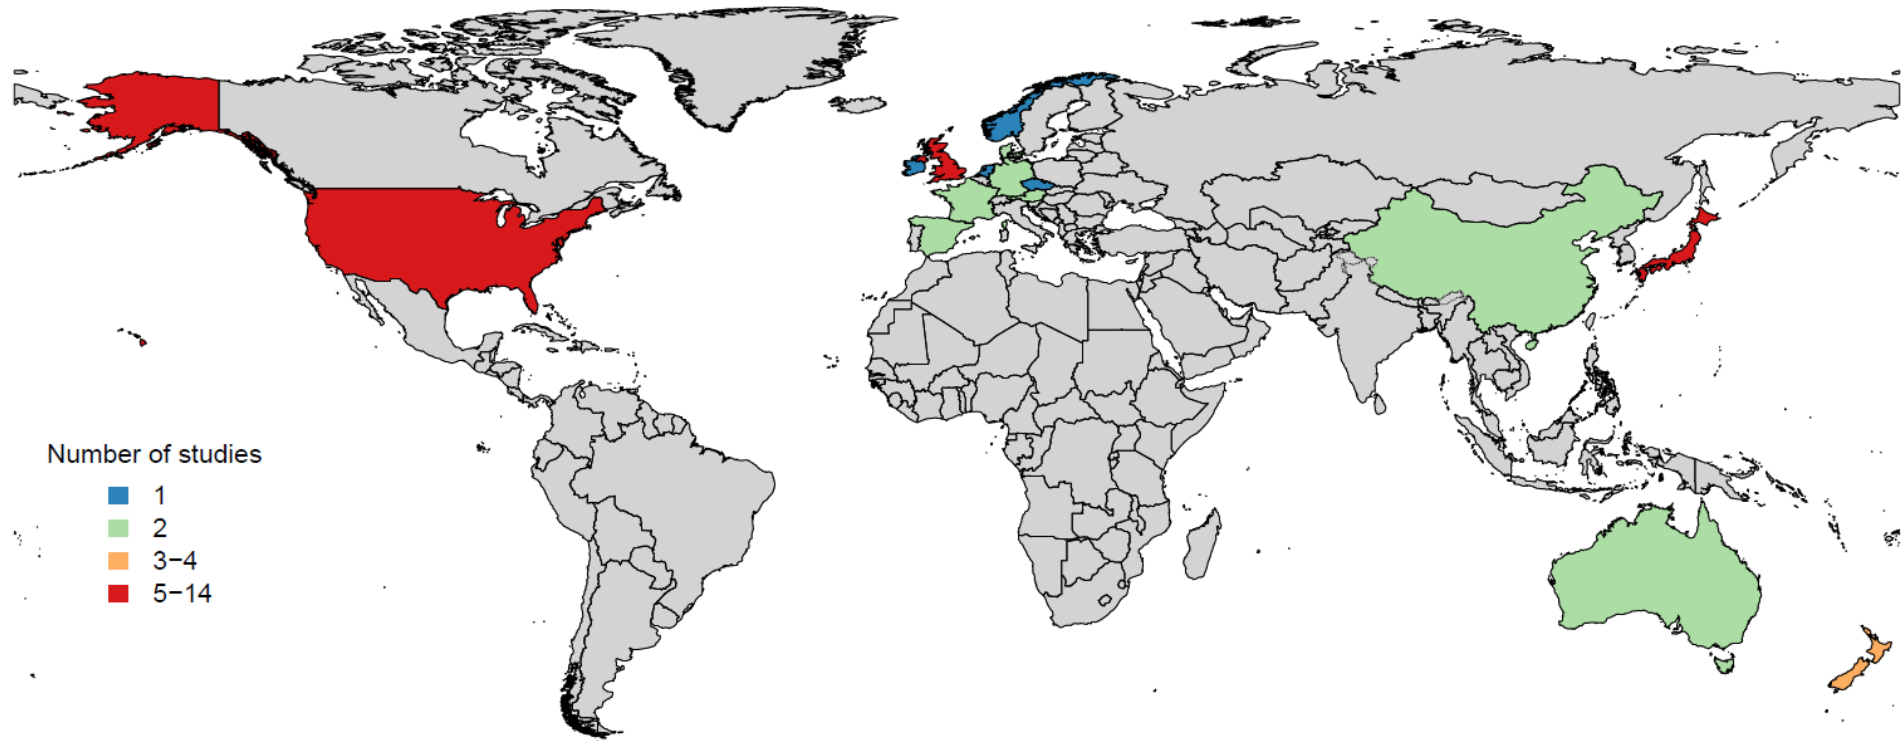

Figure S5: Prevalence of major depressive disorder per 100 000 persons due to the COVID-19 pandemic, 2020

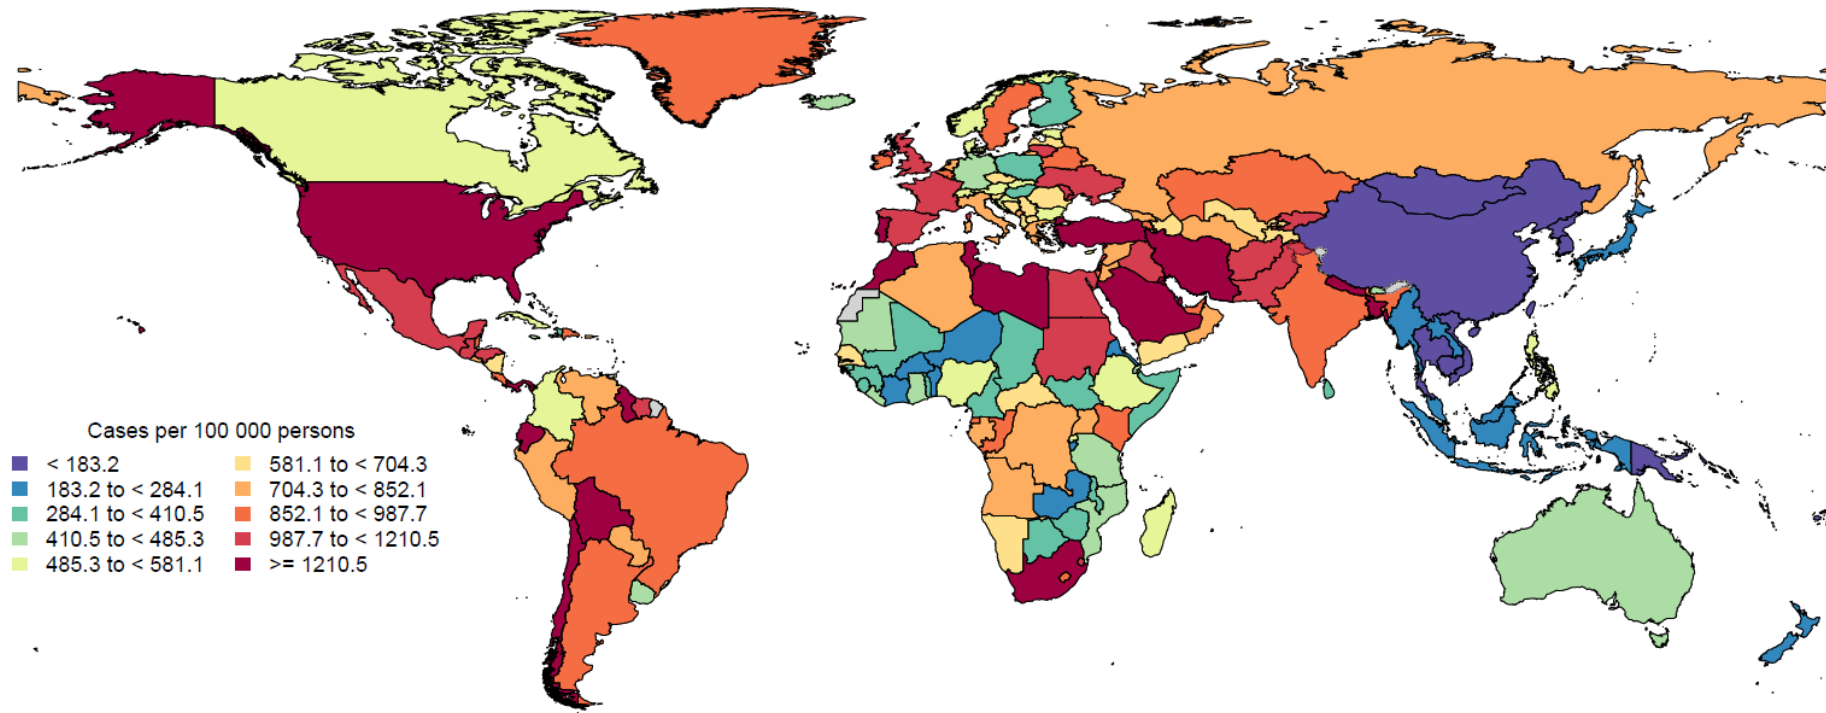

Figure S6: Prevalence of anxiety disorders per 100 000 persons due to the COVID-19 pandemic, 2020

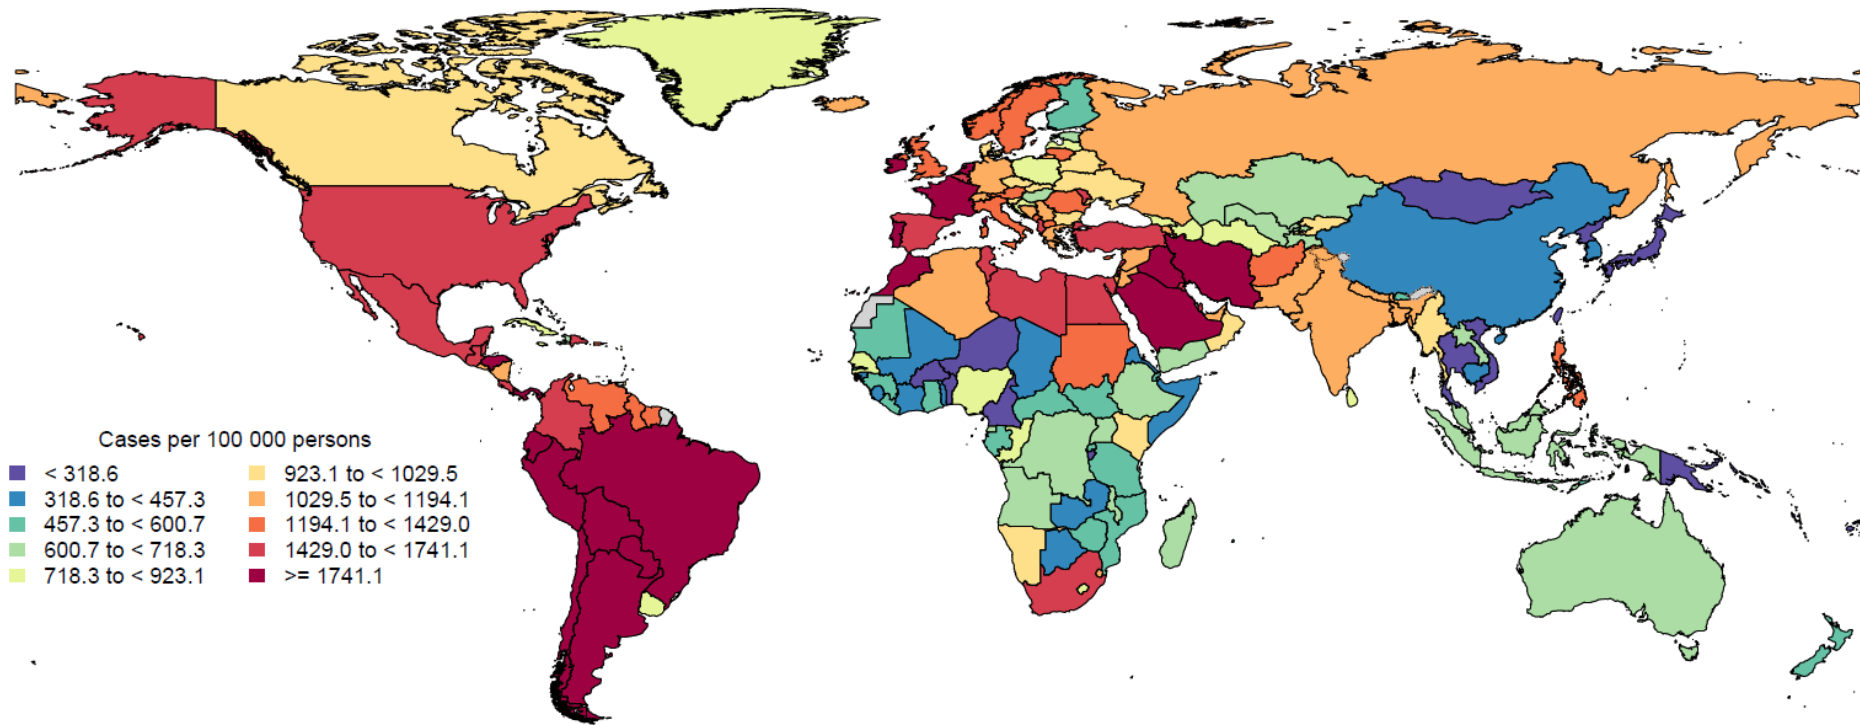

**Figure S7. The distribution of untransformed estimated daily COVID-19 infection rates vs square root and logarithmic transformations**

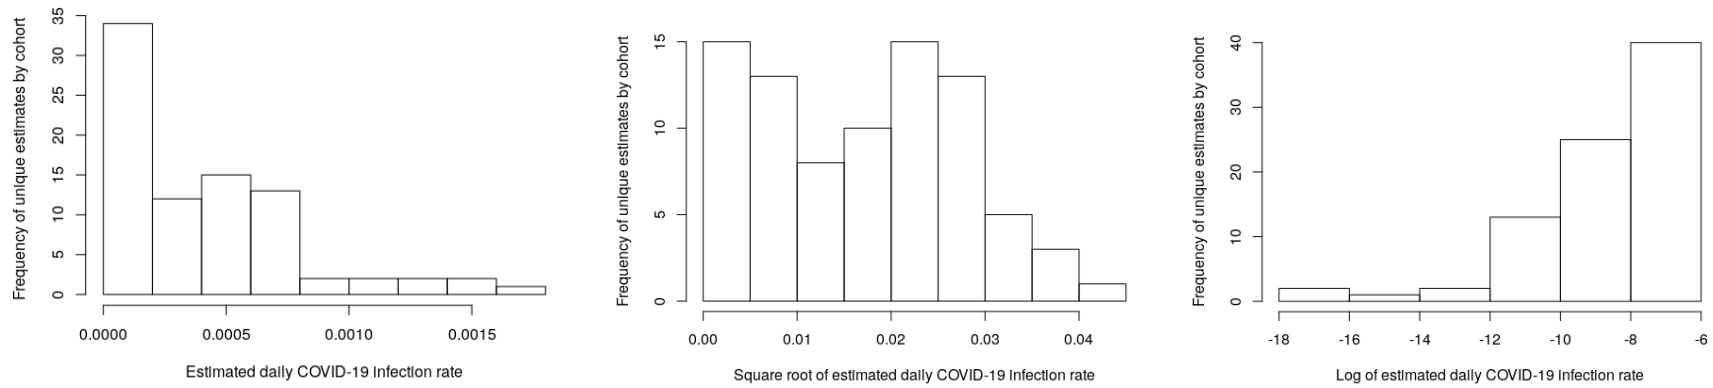

**Figure S8. The distribution of untransformed estimated daily excess mortality rates vs square root and logarithmic transformations**

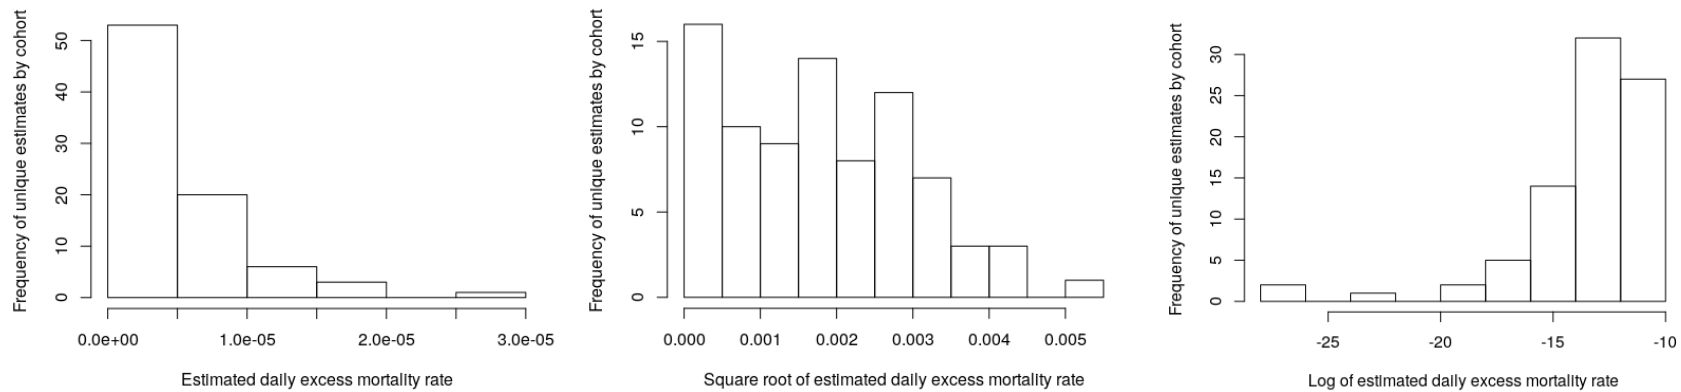



Figure S9. Scatterplot of observed difference in logit prevalence vs predicted difference in logit prevalence from the leave-one-country-out cross-validation analysis for major depressive disorder

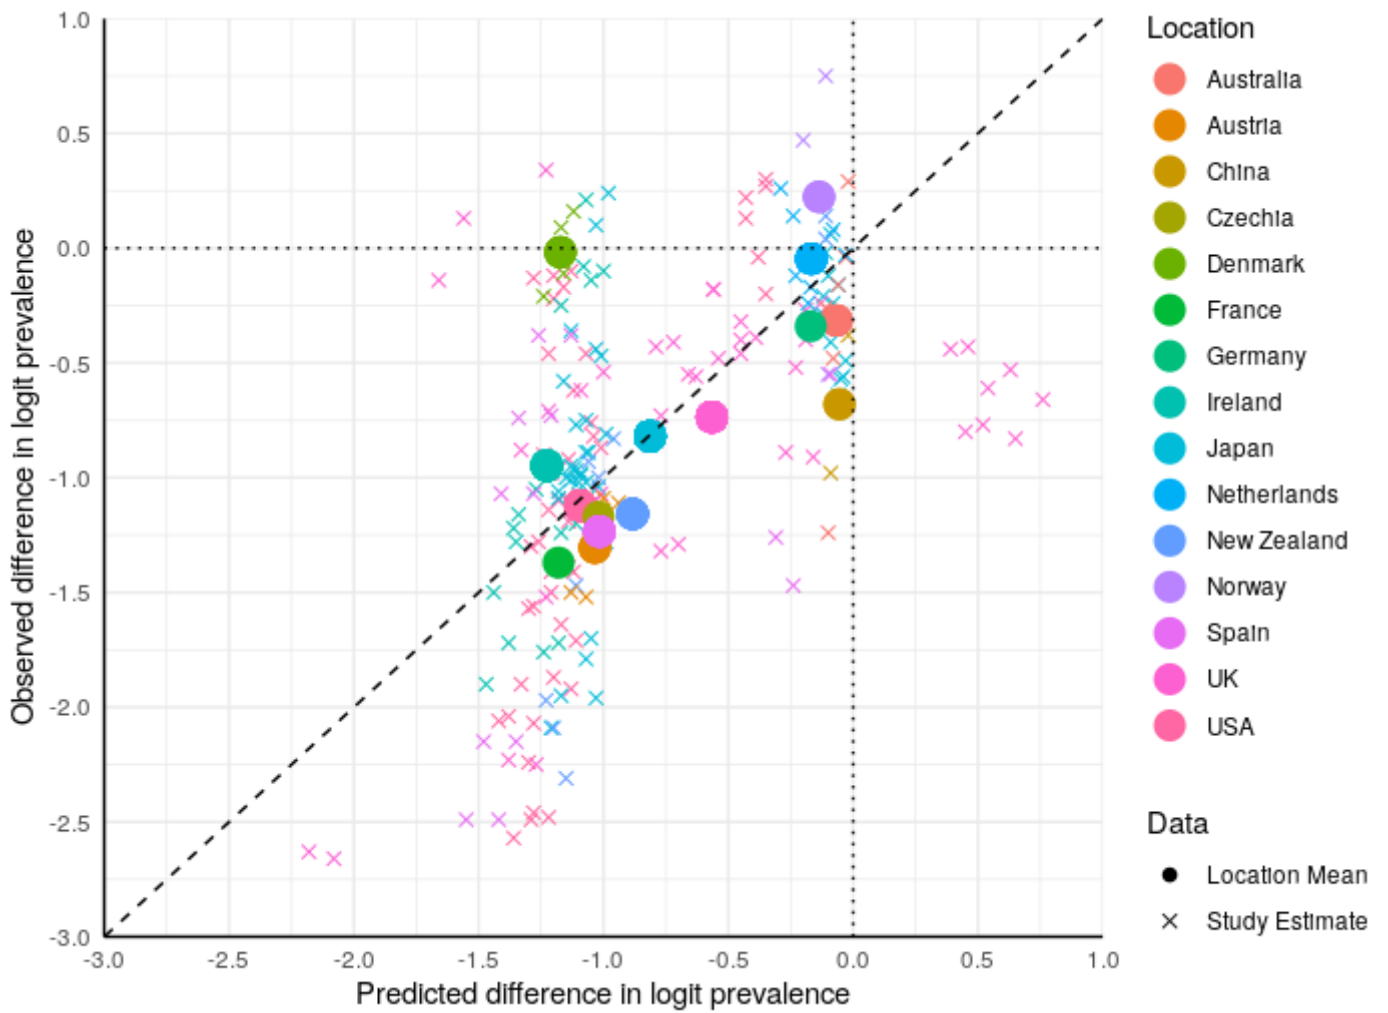

Figure S10. Scatterplot of observed difference in logit prevalence vs predicted difference in logit prevalence from the leave-one-country-out cross-validation analysis for anxiety disorders

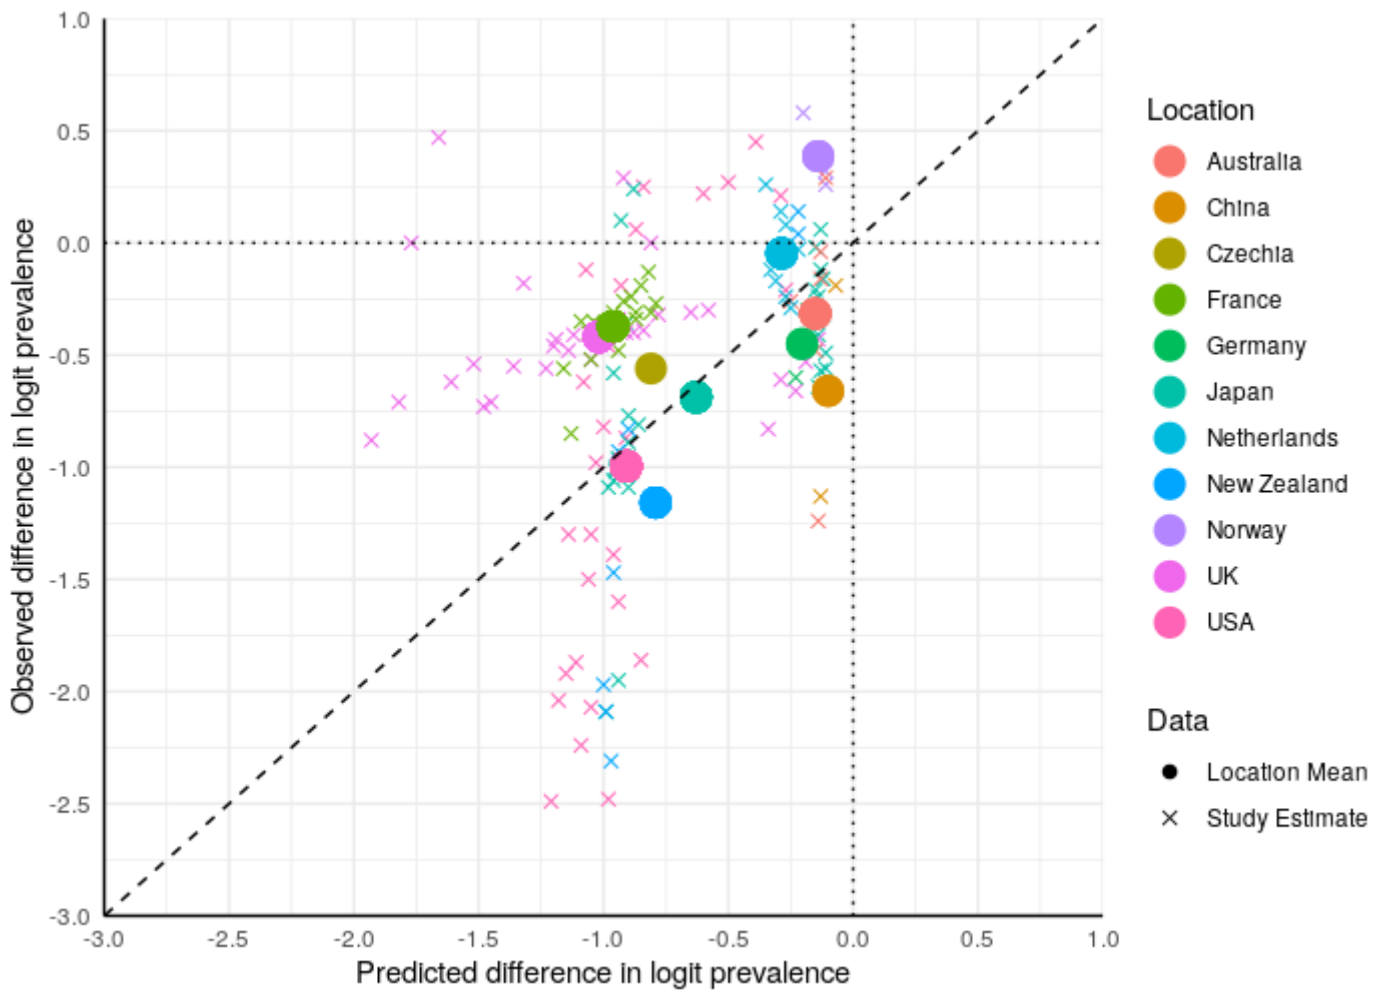

**Table S1: Guidelines for Accurate and Transparent Health Estimates Reporting (GATHER) checklist**

| Item #                                                                                                | Checklist item                                                                                                                                                                                                                                                                                                                                                                            | Location                                                                                                                                                                                                                                                                                                                                                                                                                   |
|-------------------------------------------------------------------------------------------------------|-------------------------------------------------------------------------------------------------------------------------------------------------------------------------------------------------------------------------------------------------------------------------------------------------------------------------------------------------------------------------------------------|----------------------------------------------------------------------------------------------------------------------------------------------------------------------------------------------------------------------------------------------------------------------------------------------------------------------------------------------------------------------------------------------------------------------------|
| <b>Objectives and funding</b>                                                                         |                                                                                                                                                                                                                                                                                                                                                                                           |                                                                                                                                                                                                                                                                                                                                                                                                                            |
| 1                                                                                                     | Define the indicator(s), populations (including age, sex, and geographic entities), and time period(s) for which estimates were made.                                                                                                                                                                                                                                                     | Introduction p 6                                                                                                                                                                                                                                                                                                                                                                                                           |
| 2                                                                                                     | List the funding sources for the work.                                                                                                                                                                                                                                                                                                                                                    | Acknowledgments p 24                                                                                                                                                                                                                                                                                                                                                                                                       |
| <b>Data Inputs</b>                                                                                    |                                                                                                                                                                                                                                                                                                                                                                                           |                                                                                                                                                                                                                                                                                                                                                                                                                            |
| <i>For all data inputs from multiple sources that are synthesized as part of the study:</i>           |                                                                                                                                                                                                                                                                                                                                                                                           |                                                                                                                                                                                                                                                                                                                                                                                                                            |
| 3                                                                                                     | Describe how the data were identified and how the data were accessed.                                                                                                                                                                                                                                                                                                                     | Methods: Data sources pp 8-11                                                                                                                                                                                                                                                                                                                                                                                              |
| 4                                                                                                     | Specify the inclusion and exclusion criteria. Identify all ad-hoc exclusions.                                                                                                                                                                                                                                                                                                             | Methods: Data sources pp 8-9                                                                                                                                                                                                                                                                                                                                                                                               |
| 5                                                                                                     | Provide information on all included data sources and their main characteristics. For each data source used, report reference information or contact name/institution, population represented, data collection method, year(s) of data collection, sex and age range, diagnostic criteria or measurement method, and sample size, as relevant.                                             | Table S5 Appendix pp 33-34                                                                                                                                                                                                                                                                                                                                                                                                 |
| 6                                                                                                     | Identify and describe any categories of input data that have potentially important biases (e.g., based on characteristics listed in item 5).                                                                                                                                                                                                                                              | Methods: Data sources pp 8-9                                                                                                                                                                                                                                                                                                                                                                                               |
| <i>For data inputs that contribute to the analysis but were not synthesized as part of the study:</i> |                                                                                                                                                                                                                                                                                                                                                                                           |                                                                                                                                                                                                                                                                                                                                                                                                                            |
| 7                                                                                                     | Describe and give sources for any other data inputs.                                                                                                                                                                                                                                                                                                                                      | Methods: Data sources pp 9-11                                                                                                                                                                                                                                                                                                                                                                                              |
| <i>For all data inputs:</i>                                                                           |                                                                                                                                                                                                                                                                                                                                                                                           |                                                                                                                                                                                                                                                                                                                                                                                                                            |
| 8                                                                                                     | Provide all data inputs in a file format from which data can be efficiently extracted (e.g., a spreadsheet rather than a PDF), including all relevant meta-data listed in item 5. For any data inputs that cannot be shared because of ethical or legal reasons, such as third-party ownership, provide a contact name or the name of the institution that retains the right to the data. | <i>Datasets will be available for download via Global Health Data Exchange website (<a href="http://ghdx.healthdata.org/">http://ghdx.healthdata.org/</a>)</i><br><i>Data prepped for analysis is available at <a href="https://github.com/ihmeuw/mental_disorders/tree/COVID-19_depressive_anxiety_disorders_lancet">https://github.com/ihmeuw/mental_disorders/tree/COVID-19_depressive_anxiety_disorders_lancet</a></i> |
| <b>Data analysis</b>                                                                                  |                                                                                                                                                                                                                                                                                                                                                                                           |                                                                                                                                                                                                                                                                                                                                                                                                                            |
| 9                                                                                                     | Provide a conceptual overview of the data analysis method. A diagram may be helpful.                                                                                                                                                                                                                                                                                                      | Methods: <i>Overview</i> p 7<br>Figure S1 Appendix p 17                                                                                                                                                                                                                                                                                                                                                                    |
| 10                                                                                                    | Provide a detailed description of all steps of the analysis, including mathematical formulae. This description should cover, as relevant, data cleaning, data pre-processing, data adjustments and weighting of data sources, and mathematical or statistical model(s).                                                                                                                   | Methods: Analysis pp 11-13<br>Appendix pp 6-7                                                                                                                                                                                                                                                                                                                                                                              |

|                               |                                                                                                                                                                  |                                                                                                                                                                                                                                          |
|-------------------------------|------------------------------------------------------------------------------------------------------------------------------------------------------------------|------------------------------------------------------------------------------------------------------------------------------------------------------------------------------------------------------------------------------------------|
| 11                            | Describe how candidate models were evaluated and how the final model(s) were selected.                                                                           | Methods: Analysis pp 11-13<br>Appendix pp 6-7                                                                                                                                                                                            |
| 12                            | Provide the results of an evaluation of model performance, if done, as well as the results of any relevant sensitivity analysis.                                 | Appendix pp 6-7<br>Appendix p 11                                                                                                                                                                                                         |
| 13                            | Describe methods for calculating uncertainty of the estimates. State which sources of uncertainty were, and were not, accounted for in the uncertainty analysis. | Methods: Analysis pp 11-13<br>Appendix pp 6-7                                                                                                                                                                                            |
| 14                            | State how analytic or statistical source code used to generate estimates can be accessed.                                                                        | <i>R scripts available at</i><br><a href="https://github.com/ihmeuw/mental_disorders/tree/COVID-19_depressive_anxiety_disorders_lancet">https://github.com/ihmeuw/mental_disorders/tree/COVID-19_depressive_anxiety_disorders_lancet</a> |
| <b>Results and Discussion</b> |                                                                                                                                                                  |                                                                                                                                                                                                                                          |
| 15                            | Provide published estimates in a file format from which data can be efficiently extracted.                                                                       | <i>Estimates by country available in Tables S6-S9 pp 32-63</i>                                                                                                                                                                           |
| 16                            | Report a quantitative measure of the uncertainty of the estimates (e.g. uncertainty intervals).                                                                  | <i>All estimates are reported with 95% uncertainty intervals.</i>                                                                                                                                                                        |
| 17                            | Interpret results in light of existing evidence. If updating a previous set of estimates, describe the reasons for changes in estimates.                         | Discussion pp 17-19                                                                                                                                                                                                                      |
| 18                            | Discuss limitations of the estimates. Include a discussion of any modelling assumptions or data limitations that affect interpretation of the estimates.         | Discussion pp 20-23                                                                                                                                                                                                                      |

**Table S2: PRISMA 2020 checklist**

| Section and Topic             | Item # | Checklist item                                                                                                                                                                                                                                                                                       | Location where item is reported                                                                                                                                             |
|-------------------------------|--------|------------------------------------------------------------------------------------------------------------------------------------------------------------------------------------------------------------------------------------------------------------------------------------------------------|-----------------------------------------------------------------------------------------------------------------------------------------------------------------------------|
| <b>TITLE</b>                  |        |                                                                                                                                                                                                                                                                                                      |                                                                                                                                                                             |
| Title                         | 1      | Identify the report as a systematic review.                                                                                                                                                                                                                                                          | <i>The title instead reflects the focus of this study, which was to estimate the prevalence and burden of depressive and anxiety disorders due to the COVID-19 pandemic</i> |
| <b>ABSTRACT</b>               |        |                                                                                                                                                                                                                                                                                                      |                                                                                                                                                                             |
| Abstract                      | 2      | See the PRISMA 2020 for Abstracts checklist.                                                                                                                                                                                                                                                         | Abstract: p 4 – 5                                                                                                                                                           |
| <b>INTRODUCTION</b>           |        |                                                                                                                                                                                                                                                                                                      |                                                                                                                                                                             |
| Rationale                     | 3      | Describe the rationale for the review in the context of existing knowledge.                                                                                                                                                                                                                          | Research in context: <i>Evidence before this study:</i> p 2                                                                                                                 |
| Objectives                    | 4      | Provide an explicit statement of the objective(s) or question(s) the review addresses.                                                                                                                                                                                                               | Background: pp 6-7                                                                                                                                                          |
| <b>METHODS</b>                |        |                                                                                                                                                                                                                                                                                                      |                                                                                                                                                                             |
| Eligibility criteria          | 5      | Specify the inclusion and exclusion criteria for the review and how studies were grouped for the syntheses.                                                                                                                                                                                          | Methods: <i>Case definitions</i> p 7<br>Methods: <i>Data sources</i> pp 8 – 9                                                                                               |
| Information sources           | 6      | Specify all databases, registers, websites, organisations, reference lists and other sources searched or consulted to identify studies. Specify the date when each source was last searched or consulted.                                                                                            | Methods: <i>Data sources</i> p 8                                                                                                                                            |
| Search strategy               | 7      | Present the full search strategies for all databases, registers and websites, including any filters and limits used.                                                                                                                                                                                 | Appendix: p 5                                                                                                                                                               |
| Selection process             | 8      | Specify the methods used to decide whether a study met the inclusion criteria of the review, including how many reviewers screened each record and each report retrieved, whether they worked independently, and if applicable, details of automation tools used in the process.                     | Methods: <i>Data sources</i> pp 8 – 9<br>Author contributions: pp 23 – 24                                                                                                   |
| Data collection process       | 9      | Specify the methods used to collect data from reports, including how many reviewers collected data from each report, whether they worked independently, any processes for obtaining or confirming data from study investigators, and if applicable, details of automation tools used in the process. | Methods: <i>Data sources</i> pp 8 – 9<br>Author contributions: p 23                                                                                                         |
| Data items                    | 10a    | List and define all outcomes for which data were sought. Specify whether all results that were compatible with each outcome domain in each study were sought (e.g. for all measures, time points, analyses), and if not, the methods used to decide which results to collect.                        | Methods: <i>Data sources</i> pp 8 – 9                                                                                                                                       |
|                               | 10b    | List and define all other variables for which data were sought (e.g. participant and intervention characteristics, funding sources). Describe any assumptions made about any missing or unclear information.                                                                                         | Methods: <i>Data sources</i> pp 8 – 9                                                                                                                                       |
| Study risk of bias assessment | 11     | Specify the methods used to assess risk of bias in the included studies, including details of the tool(s) used, how many reviewers assessed each study and whether they worked independently, and if applicable, details of automation tools used in the process.                                    | Methods: <i>Analysis</i> pp 11 – 12                                                                                                                                         |
| Effect measures               | 12     | Specify for each outcome the effect measure(s) (e.g. risk ratio, mean difference) used in the synthesis or presentation of results.                                                                                                                                                                  | Methods: <i>Analysis</i> pp 11 – 13                                                                                                                                         |
| Synthesis methods             | 13a    | Describe the processes used to decide which studies were eligible for each synthesis (e.g. tabulating the study intervention characteristics and comparing against the planned groups for each synthesis (item #5)).                                                                                 | Methods: <i>Data sources</i> pp 8 – 9                                                                                                                                       |
|                               | 13b    | Describe any methods required to prepare the data for presentation or synthesis, such as handling of missing                                                                                                                                                                                         | Methods: <i>Analysis</i> pp 11 – 13                                                                                                                                         |

| Section and Topic             | Item # | Checklist item                                                                                                                                                                                                                                              | Location where item is reported                                                                                                                                                                                                                                                                                                                                            |
|-------------------------------|--------|-------------------------------------------------------------------------------------------------------------------------------------------------------------------------------------------------------------------------------------------------------------|----------------------------------------------------------------------------------------------------------------------------------------------------------------------------------------------------------------------------------------------------------------------------------------------------------------------------------------------------------------------------|
|                               |        | summary statistics, or data conversions.                                                                                                                                                                                                                    | Appendix : pp 5 – 6                                                                                                                                                                                                                                                                                                                                                        |
|                               | 13c    | Describe any methods used to tabulate or visually display results of individual studies and syntheses.                                                                                                                                                      | <i>Individual studies included in the analyses are summarised in Table S5 pp 33 – 34</i>                                                                                                                                                                                                                                                                                   |
|                               | 13d    | Describe any methods used to synthesize results and provide a rationale for the choice(s). If meta-analysis was performed, describe the model(s), method(s) to identify the presence and extent of statistical heterogeneity, and software package(s) used. | Methods: <i>Analysis</i> pp 11 – 12<br>Appendix : pp 9 – 11                                                                                                                                                                                                                                                                                                                |
|                               | 13e    | Describe any methods used to explore possible causes of heterogeneity among study results (e.g. subgroup analysis, meta-regression).                                                                                                                        | Methods: <i>Analysis</i> pp 11 – 12<br>Appendix : pp 6 – 7                                                                                                                                                                                                                                                                                                                 |
|                               | 13f    | Describe any sensitivity analyses conducted to assess robustness of the synthesized results.                                                                                                                                                                | Appendix : pp 6 – 7<br>Appendix : p 11                                                                                                                                                                                                                                                                                                                                     |
| Reporting bias assessment     | 14     | Describe any methods used to assess risk of bias due to missing results in a synthesis (arising from reporting biases).                                                                                                                                     | <i>The impact of COVID-19 was estimated for locations with no epidemiological data available through the use of COVID-19 impact indicators. Additional uncertainty due to missing data was incorporated into the final estimates as described below. Trimming was used to robustify final estimates (Appendix pp 6 – 7)</i>                                                |
| Certainty assessment          | 15     | Describe any methods used to assess certainty (or confidence) in the body of evidence for an outcome.                                                                                                                                                       | <i>Our uncertainty intervals for all results incorporate uncertainty across all input data, model results, prevalence estimation, severity estimation, and disability weights. Trimming was used to robustify final estimates (appendix pp 6 – 7)</i>                                                                                                                      |
| <b>RESULTS</b>                |        |                                                                                                                                                                                                                                                             |                                                                                                                                                                                                                                                                                                                                                                            |
| Study selection               | 16a    | Describe the results of the search and selection process, from the number of records identified in the search to the number of studies included in the review, ideally using a flow diagram.                                                                | Results: <i>Study characteristics</i> p11 – 12<br>Figure S3 p 19                                                                                                                                                                                                                                                                                                           |
|                               | 16b    | Cite studies that might appear to meet the inclusion criteria, but which were excluded, and explain why they were excluded.                                                                                                                                 | The number of studies excluded and reasons for exclusion are provided in Figure S3 p 19                                                                                                                                                                                                                                                                                    |
| Study characteristics         | 17     | Cite each included study and present its characteristics.                                                                                                                                                                                                   | Table S5 pp 30 – 31                                                                                                                                                                                                                                                                                                                                                        |
| Risk of bias in studies       | 18     | Present assessments of risk of bias for each included study.                                                                                                                                                                                                | <i>Bias was accounted for via bias covariates in meta-regression</i>                                                                                                                                                                                                                                                                                                       |
| Results of individual studies | 19     | For all outcomes, present, for each study: (a) summary statistics for each group (where appropriate) and (b) an effect estimate and its precision (e.g. confidence/credible interval), ideally using structured tables or plots.                            | <i>Prevalence change estimates varied by age, sex, measure, time and could not be appropriately summarised. Data informing the meta-regression is available at <a href="https://github.com/ihmeuw/mental_disorders/tree/COVID-19_depressive_anxiety_disorders_lancet">https://github.com/ihmeuw/mental_disorders/tree/COVID-19_depressive_anxiety_disorders_lancet</a></i> |

| Section and Topic         | Item # | Checklist item                                                                                                                                                                                                                                                                       | Location where item is reported                                                                                                                                                                                                                                                                                                                                                                            |
|---------------------------|--------|--------------------------------------------------------------------------------------------------------------------------------------------------------------------------------------------------------------------------------------------------------------------------------------|------------------------------------------------------------------------------------------------------------------------------------------------------------------------------------------------------------------------------------------------------------------------------------------------------------------------------------------------------------------------------------------------------------|
| Results of syntheses      | 20a    | For each synthesis, briefly summarise the characteristics and risk of bias among contributing studies.                                                                                                                                                                               | Results: <i>Impact of COVID-19 pandemic indicators</i> p 14 – 15                                                                                                                                                                                                                                                                                                                                           |
|                           | 20b    | Present results of all statistical syntheses conducted. If meta-analysis was done, present for each the summary estimate and its precision (e.g. confidence/credible interval) and measures of statistical heterogeneity. If comparing groups, describe the direction of the effect. | Results: pp 14 – 17<br>Appendix :pp 6 – 7                                                                                                                                                                                                                                                                                                                                                                  |
|                           | 20c    | Present results of all investigations of possible causes of heterogeneity among study results.                                                                                                                                                                                       | Appendix: pp 6 – 7                                                                                                                                                                                                                                                                                                                                                                                         |
|                           | 20d    | Present results of all sensitivity analyses conducted to assess the robustness of the synthesized results.                                                                                                                                                                           | Appendix : p 6                                                                                                                                                                                                                                                                                                                                                                                             |
| Reporting biases          | 21     | Present assessments of risk of bias due to missing results (arising from reporting biases) for each synthesis assessed.                                                                                                                                                              | <i>The impact of COVID-19 was estimated for locations with no epidemiological data available through the use of COVID-19 impact indicators. Additional uncertainty due to missing data was incorporated into the final estimates as described below. A leave-one-country-out cross validation was conducted to test the generalisability of the models to locations with missing data (Appendix: p 11)</i> |
| Certainty of evidence     | 22     | Present assessments of certainty (or confidence) in the body of evidence for each outcome assessed.                                                                                                                                                                                  | <i>Our uncertainty intervals for all results incorporate uncertainty across all input data, model results, prevalence estimation, severity estimation, and disability weights. A leave-one-country-out cross validation was conducted to test the generalisability of the models to locations with missing data (Appendix: p 11)</i>                                                                       |
| <b>DISCUSSION</b>         |        |                                                                                                                                                                                                                                                                                      |                                                                                                                                                                                                                                                                                                                                                                                                            |
| Discussion                | 23a    | Provide a general interpretation of the results in the context of other evidence.                                                                                                                                                                                                    | Discussion pp 17 – 19                                                                                                                                                                                                                                                                                                                                                                                      |
|                           | 23b    | Discuss any limitations of the evidence included in the review.                                                                                                                                                                                                                      | Discussion pp 20 – 23                                                                                                                                                                                                                                                                                                                                                                                      |
|                           | 23c    | Discuss any limitations of the review processes used.                                                                                                                                                                                                                                | Discussion pp 20 – 23                                                                                                                                                                                                                                                                                                                                                                                      |
|                           | 23d    | Discuss implications of the results for practice, policy, and future research.                                                                                                                                                                                                       | Discussion pp 19 – 20                                                                                                                                                                                                                                                                                                                                                                                      |
| <b>OTHER INFORMATION</b>  |        |                                                                                                                                                                                                                                                                                      |                                                                                                                                                                                                                                                                                                                                                                                                            |
| Registration and protocol | 24a    | Provide registration information for the review, including register name and registration number, or state that the review was not registered.                                                                                                                                       | Methods: <i>Data sources</i> p 8                                                                                                                                                                                                                                                                                                                                                                           |
|                           | 24b    | Indicate where the review protocol can be accessed, or state that a protocol was not prepared.                                                                                                                                                                                       | Methods: <i>Data sources</i> p 8<br><i>Protocol can be obtained by contacting the corresponding author.</i>                                                                                                                                                                                                                                                                                                |
|                           | 24c    | Describe and explain any amendments to information provided at registration or in the protocol.                                                                                                                                                                                      | <i>The start and end dates for the literature search were updated at the end of the project accordingly.</i>                                                                                                                                                                                                                                                                                               |

| Section and Topic                              | Item # | Checklist item                                                                                                                                                                                                                             | Location where item is reported                                                                                                                                                                                                                                                                  |
|------------------------------------------------|--------|--------------------------------------------------------------------------------------------------------------------------------------------------------------------------------------------------------------------------------------------|--------------------------------------------------------------------------------------------------------------------------------------------------------------------------------------------------------------------------------------------------------------------------------------------------|
| Support                                        | 25     | Describe sources of financial or non-financial support for the review, and the role of the funders or sponsors in the review.                                                                                                              | Methods: <i>Role of the funding source</i> p 13<br>Acknowledgements: p 24                                                                                                                                                                                                                        |
| Competing interests                            | 26     | Declare any competing interests of review authors.                                                                                                                                                                                         | Declarations of interest: p 24                                                                                                                                                                                                                                                                   |
| Availability of data, code and other materials | 27     | Report which of the following are publicly available and where they can be found: template data collection forms; data extracted from included studies; data used for all analyses; analytic code; any other materials used in the review. | Data and code used for analyses are available in the upcoming GBD input data tool and at <a href="https://github.com/ihmeuw/mental_disorders/tree/COVID-19_depressive_anxiety_disorders_lancet">https://github.com/ihmeuw/mental_disorders/tree/COVID-19_depressive_anxiety_disorders_lancet</a> |

From: Page MJ, McKenzie JE, Bossuyt PM, Boutron I, Hoffmann TC, Mulrow CD, et al. The PRISMA 2020 statement: an updated guideline for reporting systematic reviews. *BMJ* 2021;372:n71. doi: 10.1136/bmj.n71

For more information, visit: <http://www.prisma-statement.org/>



**Table S3: Severity proportions and disability weights for major depressive disorder and anxiety disorders in GBD 2020**

| Sequela                          | Severity proportions (95% UI) | Disability weights (95% UI) |
|----------------------------------|-------------------------------|-----------------------------|
| <b>Major depressive disorder</b> |                               |                             |
| Asymptomatic                     | 13.0% (9.7–16.6)              | 0.000                       |
| Mild                             | 59.4% (49.1–68.8)             | 0.145 (0.099–0.209)         |
| Moderate                         | 17.3% (12.7–22.1)             | 0.396 (0.267–0.531)         |
| Severe                           | 10.3% (3.2–19.8)              | 0.658 (0.477–0.807)         |
| <b>Anxiety disorders</b>         |                               |                             |
| Asymptomatic                     | 19.5% (16.1–23.1)             | 0.000                       |
| Mild                             | 37.6% (28.4–46.6)             | 0.030 (0.018–0.046)         |
| Moderate                         | 26.7% (20.2–32.8)             | 0.133 (0.091–0.186)         |
| Severe                           | 16.2% (9.5–24.4)              | 0.523 (0.362–0.677)         |

UI=uncertainty interval.

**Table S4: Bias covariates considered in the meta-regression of change in prevalence**

| Bias covariate                                    | Reason for potential bias                                                                                                                                                                                                                                                                                                                                                                                                                                                                                                                                                                                                                                                                                                                                                                                                                              |
|---------------------------------------------------|--------------------------------------------------------------------------------------------------------------------------------------------------------------------------------------------------------------------------------------------------------------------------------------------------------------------------------------------------------------------------------------------------------------------------------------------------------------------------------------------------------------------------------------------------------------------------------------------------------------------------------------------------------------------------------------------------------------------------------------------------------------------------------------------------------------------------------------------------------|
| Combined depressive and anxiety disorder symptoms | Estimates reflecting change in combined depressive and anxiety disorder symptoms will likely over-estimate the change compared to estimates of one disorder as the former will include more new cases than the latter.                                                                                                                                                                                                                                                                                                                                                                                                                                                                                                                                                                                                                                 |
| Cross-sectional random sample                     | Comparisons between cross-sectional random samples are likely to be more heterogeneous than comparisons within a longitudinal sample. However, there is no clear prior to the direction of any systematic bias.                                                                                                                                                                                                                                                                                                                                                                                                                                                                                                                                                                                                                                        |
| Cross-sectional market research / quota sample    | Comparisons between cross-sectional random samples are likely to be more heterogeneous than comparisons within a longitudinal sample. Samples derived from market research / quota sampling are typically not randomly sampled from the population and there may be systematic biases in the sample selected and / or biases participant retention in o. These samples may have lower rates of employment, be more likely to come from a lower socioeconomic status, and have higher rates of mental disorders. Estimates of change in prevalence derived from these samples vs a baseline random sample may look larger than the estimates derived from the general population because their baseline prevalence prior to the pandemic was already higher than the general population and any increase in prevalence will exacerbate this difference. |
| Longitudinal market research / quota sample       | Samples derived from market research quota sampling are not randomly sampled from the population and there may be systematic biases in the sample selected. These samples may have lower rates of employment, be more likely to come from a lower socioeconomic status, and have higher rates of mental disorders. Estimates of change in prevalence derived from these samples may look smaller than the estimates derived from the general population because their baseline prevalence prior to the pandemic was already higher than the general population.                                                                                                                                                                                                                                                                                        |

**Table S5: Characteristics of studies and data included in the analysis**

| Study name                             | Case name                                | Location                 | Ages     | Sample size | Case definition                                   | Baseline                                         |
|----------------------------------------|------------------------------------------|--------------------------|----------|-------------|---------------------------------------------------|--------------------------------------------------|
| <b>Longitudinal studies (14) *</b>     |                                          |                          |          |             |                                                   |                                                  |
| Ayuso-Mateos et al <sup>7</sup>        | Major depressive episode                 | Spain                    | 18 to 99 | 1103        | CIDI                                              |                                                  |
| Biddle et al <sup>21</sup>             | Depression and anxiety symptoms          | Australia                | 18 to 99 | 3155        | K6 (19+ score)                                    |                                                  |
| Bulbulia et al <sup>22</sup> (1)       | Depression and anxiety symptoms          | New Zealand              | 18 to 99 | 940         | K6 (13+ score)                                    |                                                  |
| Daly et al (a) <sup>23</sup> (2)       | Depression and anxiety symptoms          | United Kingdom           | 18 to 99 | 14 393      | GHQ-12 (3+score)                                  |                                                  |
| Katz et al <sup>24</sup>               | Probable depression and probable anxiety | United States of America | 19 to 72 | 102         | DASS-A (8+ score), DASS-D (11+ score)             |                                                  |
| Katz et al <sup>24</sup>               | Probable depression and probable anxiety | United Kingdom           | 21 to 75 | 100         | DASS-A (8+ score), DASS-D (11+ score)             |                                                  |
| Kikuchi et al <sup>25</sup>            | Depression and anxiety symptoms          | Tokyo, Japan             | 20 to 79 | 2078        | K6 (13+ score)                                    |                                                  |
| Kwong et al <sup>26</sup> (3)          | Probable depression and probable anxiety | England                  | 27 to 29 | 2872        | SMFQ (11+score); GAD-7 (10+ score)                |                                                  |
| Marroquin et al <sup>27</sup>          | Probable depression and probable anxiety | United States of America | 20 to 73 | 118         | CES-D (16+ score), GAD-7 (10+ score)              |                                                  |
| Peters et al <sup>4</sup> (4)          | Probable depression and probable anxiety | Germany                  | 20 to 74 | 113 928     | PHQ-9 ( 10+ score) GAD-9 (10+ score)              |                                                  |
| Van der Velden et al <sup>28</sup> (5) | Depression and anxiety symptoms          | Netherlands              | 18 to 99 | 3980        | MHI-5 (60+ score)                                 |                                                  |
| Vizard et al <sup>29</sup> (6)         | Probable depression                      | United Kingdom           | 18 to 99 | 3527        | PHQ-8 (10+ score)                                 |                                                  |
| Wanberg et al <sup>30</sup> (7)        | Probable depression                      | United States of America | 30 to 81 | 1143        | PHQ-8 (10+ score)                                 |                                                  |
| Widnall et al <sup>31</sup>            | Probable depression and probable anxiety | England                  | 13 to 14 | 1047        | HADS-depression (7+score) HADS-Anxiety (9+ score) |                                                  |
| Zhang et al <sup>32</sup>              | Probable depression and probable anxiety | Anhui, China             | 9 to 15  | 1241        | MFQ (27+ score), HBQ(4 + score)                   |                                                  |
| <b>Cross-sectional studies (34)</b>    |                                          |                          |          |             |                                                   |                                                  |
| ABS (2020) <sup>33</sup>               | Depression and anxiety symptoms          | Australia                | 18 to 99 | 16 370      | K10 (22+ score)                                   | ABS (2017/2018) <sup>34</sup>                    |
| Bryan et al <sup>35</sup>              | Probable depression                      | United States of America | 18 to 99 | 10 625      | PHQ-9 (10+ score)                                 | NHANES <sup>36</sup>                             |
| Choi et al <sup>37</sup>               | Probable depression and probable anxiety | Hong Kong                | 18 to 99 | 500         | PHQ-9 (10+ score), GAD-7 (10+ score)              | Ni et al <sup>38</sup> , Lau et al <sup>39</sup> |
| Daly et al (b) <sup>40</sup>           | Probable depression                      | Ireland                  | 18 to 99 | 1038        | PHQ-9 (10+ score)                                 | Ireland Health survey <sup>41</sup>              |
| Ettman et al <sup>42</sup> (8)         | Probable depression                      | United States of America | 18 to 99 | 1441        | PHQ-9 (10+ score)                                 | NHANES <sup>36</sup>                             |
| Every-Palmer et al <sup>43</sup>       | Depression and anxiety symptoms          | New Zealand              | 18 to 90 | 2416        | K6 (13+ score)                                    | New Zealand Health Survey <sup>44</sup>          |
| Fukase et al <sup>45</sup>             | Probable depression                      | Japan                    | 20 to 69 | 2708        | PHQ-9 (10+ score)                                 | Reiko et al <sup>46</sup>                        |
| Groarke et al <sup>47</sup>            | Probable depression                      | United Kingdom           | 18 to 87 | 1402        | PHQ-9 (10+ score)                                 | Vizard et al <sup>29</sup>                       |
| Wilson et al <sup>48</sup>             | Probable depression                      | United States of America | 18 to 85 | 848         | PHQ-9 (10+ score)                                 | NHANES <sup>36</sup>                             |
| Kantor et al <sup>49</sup>             | Probable depression and probable anxiety | United States of America | 18 to 99 | 1005        | PHQ-9 (10+ score), GAD-7 (10+ score)              | NHANES <sup>36</sup> , NCHS <sup>50</sup>        |
| Killgore et al <sup>51</sup>           | Probable depression                      | United States of America | 18 to 84 | 1070        | PHQ-9 (10+ score)                                 | NHANES <sup>36</sup>                             |

| Study name                               | Case name                                      | Location                 | Ages     | Sample size | Case definition                         | Baseline                             |
|------------------------------------------|------------------------------------------------|--------------------------|----------|-------------|-----------------------------------------|--------------------------------------|
| Kiuchi et al <sup>52</sup>               | Depression and anxiety symptoms                | Japan                    | 18 to 99 | 1500        | K6 (13+ score)                          | MHLW <sup>53</sup>                   |
| Knudsen et al <sup>9</sup>               | Major depressive episode and anxiety disorder  | Trondheim, Norway        | 20 to 65 | 566         | CIDI                                    | Knudsen et al <sup>9</sup>           |
| McGinty et al (a) <sup>54</sup> (8)      | Depression and anxiety symptoms                | United States of America | 18 to 99 | 1468        | K6 (13+ score)                          | McGinty et al (a) <sup>54</sup> (8)  |
| McGinty et al (b) <sup>55</sup> (8)      | Depression and anxiety symptoms                | United States of America | 18 to 99 | 1337        | K6 (13+ score)                          | McGinty et al (b) <sup>55</sup> (8)  |
| Maxfield et al <sup>56</sup>             | Probable depression                            | United States of America | 18 to 82 | 485         | PHQ-9 (10+ score)                       | NHANES <sup>36</sup>                 |
| O'Connor et al <sup>57</sup>             | Probable depression                            | United Kingdom           | 18 to 99 | 3077        | PHQ-9 (10+ score)                       | Vizard et al <sup>29</sup>           |
| Peretti-Watel et al <sup>58</sup>        | Probable depression                            | France                   | 18 to 99 | 2003        | PHQ-9 (10+ score)                       | IRDES 2014 <sup>59</sup>             |
| Pieh et al (a) <sup>60</sup>             | Probable depression                            | Austria                  | 18 to 99 | 437         | PHQ-9 (10+ score)                       | Austria Health Survey <sup>61</sup>  |
| Pieh et al (b) <sup>62</sup>             | Probable depression                            | Austria                  | 18 to 99 | 1005        | PHQ-8 (10+ score)                       | Austria Health Survey <sup>61</sup>  |
| Pieh et al (c) <sup>63</sup>             | Probable depression                            | United Kingdom           | 18 to 99 | 436         | PHQ-9 (10+ score)                       | Vizard et al <sup>29</sup>           |
| Sønderskov et al (a) <sup>64</sup> (9)   | Depression and anxiety symptoms                | Denmark                  | 18 to 99 | 3508        | WHO-5 (50+ score)                       | Sønderskov et al <sup>65</sup>       |
| Sønderskov et al (b) <sup>65</sup> (9)   | Depression and anxiety symptoms                | Denmark                  | 18 to 99 | 3508        | WHO-5 (50+ score)                       | Sønderskov et al <sup>65</sup>       |
| Sante Publique France <sup>66</sup>      | probable anxiety                               | France                   | 18 to 99 | 2000        | HAD (10+ score)                         | Sante Publique France <sup>66</sup>  |
| Shevlin et al <sup>67</sup>              | Probable depression                            | United Kingdom           | 18 to 83 | 2025        | PHQ-9 (10+ score)                       | Vizard et al <sup>29</sup>           |
| Sibley et al <sup>68</sup> (1)           | Depression and anxiety symptoms                | New Zealand              | 18 to 99 | 991         | K6 (13+ score)                          | Sibley et al <sup>68</sup>           |
| Twenge et al <sup>69</sup>               | Depression and anxiety symptoms                | United States of America | 18 to 99 | 2032        | K6 (13+ score)                          | NCHS <sup>50</sup>                   |
| Ravens-Sieberer et al <sup>70</sup> (10) | probable anxiety                               | Germany                  | 11 to 17 | 1040        | German version of SCARED (9+ score)     | Ravens-Sieberer et al <sup>70</sup>  |
| Ueda et al <sup>71</sup>                 | Probable depression                            | Japan                    | 18 to 99 | 2000        | PHQ-9 (10+ score)                       | Reiko et al <sup>46</sup>            |
| Valiente et al <sup>72</sup>             | Probable depression                            | Spain                    | 18 to 75 | 2070        | PHQ-9 (10+ score)                       | European Health survey <sup>73</sup> |
| Vieira et al <sup>74</sup>               | Probable depression and probable anxiety       | United States of America | 17 to 74 | 887         | DASS-A (8+ score)<br>DASS-D (11+ score) | Scholten et al <sup>75</sup>         |
| Winkler et al <sup>8</sup>               | Major depressive disorder and anxiety disorder | Czech Republic           | 18 to 99 | 3021        | MINI                                    | Winkler et al <sup>8</sup>           |
| Yamamoto et al <sup>76</sup>             | Probable depression, depression symptoms       | Japan                    | 18 to 89 | 11 333      | PHQ-9 (10+ score), K6 (13+ score)       | Reiko et al <sup>46</sup>            |
| Zhou et al <sup>77</sup>                 | Probable depression and probable anxiety       | United States of America | 18 to 90 | 1025        | DASS-A (8+ score)<br>DASS-D (11+ score) | Scholten et al <sup>75</sup>         |

CIDI: The Composite International Diagnostic Interview; PHQ-9: The Patient Health Questionnaire (PHQ)-9; GAD-7: General Anxiety Disorder-7; DASS: Depression Anxiety Stress Scales, K6 OR 10: Anxiety and depression checklist; GHQ-12: The General Health Questionnaire-12, MHI-5: The Mental Health Inventory; SCARED: Screen for Child Anxiety Related Disorders; HAD: Hospital Anxiety and Depression Scale; N/A: not available; \* longitudinal studies have their own baseline. Some studies used the same cohort of people, cohorts available in more than one study were: (1): New Zealand Attitudes and Values Study (NZAVS); (2): UK Household Longitudinal Study (UKHLS or Understanding Society); (3): Avon Longitudinal Study of Parents and Children (ALSPAC); (4): German National Cohort (NAKO); (5): Longitudinal Internet studies for the Social Sciences (LISS) panel; (6): Opinions and Lifestyle Survey (OPN); (7): RAND American Life Panel; (8): AmeriSpeak standing panel; (9): COVID-19 Consequences Denmark Panel Survey 2020 (CCDPS 2020); (10): COPSYP study

**Table S6: Prevalence and DALYs of MDD per 100 000 persons, with 95% uncertainty intervals, by location, for the year 2020**

| Location                                                | Baseline prevalence           | Additional prevalence       | Final prevalence              | % change                | Baseline DALYs             | Additional DALYs           | Final DALYs                 |
|---------------------------------------------------------|-------------------------------|-----------------------------|-------------------------------|-------------------------|----------------------------|----------------------------|-----------------------------|
| <b>Global</b>                                           | <b>2470.5 (2143.5–2870.7)</b> | <b>682.4 (574.1–807.2)</b>  | <b>3152.9 (2722.5–3654.5)</b> | <b>27.6 (25.1–30.3)</b> | <b>497.0 (338.3–691.1)</b> | <b>137.1 (92.5–190.6)</b>  | <b>634.1 (431.3–881.0)</b>  |
| <b>Central Europe, eastern Europe, and central Asia</b> | <b>2519.7 (2185.0–2911.5)</b> | <b>741.6 (579.1–941.3)</b>  | <b>3261.3 (2798.6–3804.8)</b> | <b>29.4 (23.9–35.8)</b> | <b>500.8 (343.0–704.9)</b> | <b>147.2 (97.2–211.5)</b>  | <b>647.9 (441.3–907.3)</b>  |
| <b>Central Asia</b>                                     | <b>2096.6 (1774.9–2515.0)</b> | <b>728.4 (425.3–1082.9)</b> | <b>2825.0 (2301.8–3477.0)</b> | <b>34.7 (21.8–49.2)</b> | <b>425.5 (286.7–600.8)</b> | <b>147.6 (77.6–239.4)</b>  | <b>573.1 (373.9–812.1)</b>  |
| Armenia                                                 | 2421.3 (2040.1–2886.1)        | 879.7 (153.6–1720.9)        | 3301.0 (2435.8–4324.7)        | 36.4 (6.3–70.4)         | 484.6 (322.8–687.8)        | 175.8 (31.0–363.4)         | 660.4 (408.0–980.4)         |
| Azerbaijan                                              | 1859.9 (1546.6–2228.8)        | 646.4 (133.1–1276.4)        | 2506.3 (1872.9–3328.6)        | 34.8 (7.7–67.5)         | 377.1 (252.2–536.1)        | 130.9 (27.7–272.7)         | 508.0 (320.6–768.6)         |
| Georgia                                                 | 3086.1 (2595.2–3656.8)        | 848.6 (27.5–1847.3)         | 3934.7 (2927.9–5175.0)        | 27.5 (0.9–59.1)         | 611.5 (408.2–863.5)        | 167.9 (4.4–380.9)          | 779.4 (479.9–1151.2)        |
| Kazakhstan                                              | 2460.7 (2094.0–2907.7)        | 861.8 (154.7–1662.7)        | 3322.5 (2463.9–4356.8)        | 35.0 (6.4–67.9)         | 496.2 (337.3–701.8)        | 173.4 (31.3–350.0)         | 669.7 (425.8–973.8)         |
| Kyrgyzstan                                              | 2210.4 (1871.3–2645.7)        | 1129.7 (349.5–2123.9)       | 3340.1 (2453.3–4495.7)        | 51.2 (16.2–91.9)        | 450.7 (302.1–642.7)        | 230.8 (70.1–464.4)         | 681.5 (413.7–1048.0)        |
| Mongolia                                                | 2906.3 (2451.9–3485.3)        | 62.4 (–613.4–877.4)         | 2968.8 (2177.7–3966.2)        | 2.2 (–20.1–30.1)        | 590.8 (391.9–836.5)        | 12.2 (–129.4–181.3)        | 603.0 (375.9–911.2)         |
| Tajikistan                                              | 1546.1 (1276.2–1884.7)        | 597.1 (152.6–1154.1)        | 2143.2 (1580.3–2835.6)        | 38.6 (9.9–74.0)         | 316.1 (210.9–448.0)        | 121.9 (30.8–244.2)         | 438.0 (268.3–661.8)         |
| Turkmenistan                                            | 1955.6 (1639.5–2368.5)        | 732.2 (155.9–1434.1)        | 2687.8 (1973.3–3614.1)        | 37.5 (8.1–73.1)         | 398.2 (261.8–572.6)        | 149.1 (30.2–325.8)         | 547.3 (336.9–826.0)         |
| Uzbekistan                                              | 1919.7 (1591.0–2333.1)        | 682.8 (131.7–1356.9)        | 2602.5 (1910.9–3447.5)        | 35.5 (6.9–68.4)         | 391.9 (262.5–554.0)        | 139.0 (25.2–296.2)         | 530.9 (324.5–790.5)         |
| <b>Central Europe</b>                                   | <b>2080.1 (1791.2–2408.6)</b> | <b>517.6 (351.3–728.0)</b>  | <b>2597.8 (2212.2–3041.6)</b> | <b>24.9 (17.1–34.6)</b> | <b>410.5 (278.5–569.9)</b> | <b>102.0 (59.6–156.7)</b>  | <b>512.5 (347.5–707.6)</b>  |
| Albania                                                 | 1704.8 (1439.1–2027.8)        | 660.0 (125.1–1360.6)        | 2364.7 (1730.4–3164.1)        | 38.7 (7.2–76.9)         | 341.6 (229.9–485.7)        | 132.8 (25.1–288.4)         | 474.5 (284.0–712.7)         |
| Bosnia and Herzegovina                                  | 2346.3 (1960.5–2820.9)        | 644.5 (43.1–1332.7)         | 2990.8 (2264.6–3875.4)        | 27.6 (1.9–56.8)         | 461.5 (305.7–651.0)        | 126.5 (10.8–287.0)         | 588.0 (375.7–876.3)         |
| Bulgaria                                                | 2400.1 (1974.8–2852.8)        | 561.7 (–49.0–1311.8)        | 2961.8 (2237.5–3886.2)        | 23.5 (–2.0–53.0)        | 470.2 (314.6–658.9)        | 110.1 (–9.1–261.8)         | 580.3 (369.8–860.3)         |
| Croatia                                                 | 2771.3 (2316.7–3280.0)        | 549.7 (–86.1–1352.4)        | 3321.1 (2464.7–4342.6)        | 19.8 (–3.4–47.9)        | 542.8 (368.9–760.2)        | 108.1 (–19.2–284.1)        | 650.9 (411.0–991.3)         |
| Czechia                                                 | 2490.1 (2106.8–2945.4)        | 582.7 (–65.9–1297.3)        | 3072.8 (2308.3–3966.8)        | 23.5 (–2.5–52.9)        | 488.1 (330.3–685.7)        | 114.1 (–11.4–266.3)        | 602.1 (384.3–859.1)         |
| Hungary                                                 | 2573.9 (2159.9–3074.0)        | 368.4 (–231.3–1016.8)       | 2942.2 (2223.4–3832.4)        | 14.3 (–8.4–39.4)        | 503.2 (338.5–708.8)        | 72.3 (–44.3–217.0)         | 575.5 (351.8–846.8)         |
| Montenegro                                              | 2225.3 (1878.1–2680.2)        | 716.3 (57.4–1440.6)         | 2941.6 (2184.6–3834.6)        | 32.2 (2.5–63.4)         | 442.1 (295.6–614.7)        | 142.0 (9.3–296.3)          | 584.0 (356.2–842.8)         |
| North Macedonia                                         | 1913.4 (1594.4–2286.7)        | 698.0 (173.8–1384.2)        | 2611.4 (1939.8–3432.3)        | 36.5 (9.3–70.1)         | 379.9 (253.5–532.1)        | 138.3 (31.7–282.0)         | 518.3 (323.4–770.3)         |
| Poland                                                  | 1553.1 (1324.3–1813.5)        | 377.5 (250.7–530.0)         | 1930.6 (1626.1–2279.2)        | 24.3 (16.6–32.8)        | 308.7 (212.7–435.2)        | 74.8 (44.7–115.0)          | 383.5 (264.9–537.1)         |
| Romania                                                 | 2138.7 (1797.1–2524.4)        | 692.0 (100.9–1433.4)        | 2830.7 (2122.4–3731.4)        | 32.4 (4.7–67.2)         | 423.3 (282.3–588.6)        | 136.8 (20.0–311.7)         | 560.1 (350.6–823.7)         |
| Serbia                                                  | 2379.9 (1989.7–2835.7)        | 591.8 (–1.0–1315.7)         | 2971.7 (2245.3–3884.9)        | 24.8 (–0.0–55.3)        | 468.7 (315.3–653.3)        | 116.6 (–0.2–275.1)         | 585.3 (367.5–869.5)         |
| Slovakia                                                | 2221.3 (1840.9–2636.6)        | 527.1 (–47.2–1199.0)        | 2748.4 (2032.5–3639.4)        | 23.8 (–2.3–52.9)        | 439.7 (287.3–618.9)        | 103.7 (–8.9–250.7)         | 543.4 (348.9–800.3)         |
| Slovenia                                                | 2967.4 (2504.9–3525.3)        | 677.5 (–44.5–1554.1)        | 3644.9 (2749.2–4776.0)        | 22.8 (–1.6–51.0)        | 581.1 (393.3–820.3)        | 131.9 (–7.9–313.9)         | 713.0 (444.3–1053.7)        |
| <b>Eastern Europe</b>                                   | <b>2954.9 (2542.3–3412.6)</b> | <b>869.6 (641.2–1179.5)</b> | <b>3824.5 (3258.2–4497.5)</b> | <b>29.4 (22.1–38.3)</b> | <b>584.5 (399.5–816.9)</b> | <b>171.8 (109.2–261.0)</b> | <b>756.3 (518.1–1072.3)</b> |
| Belarus                                                 | 3685.0 (3122.7–4320.9)        | 909.2 (–16.1–2013.9)        | 4594.2 (3420.3–5927.6)        | 24.7 (–0.5–54.0)        | 730.7 (490.1–1019.9)       | 179.8 (–2.6–419.7)         | 910.5 (575.4–1335.6)        |
| Estonia                                                 | 3723.5 (3086.1–4403.5)        | 539.8 (–309.7–1534.6)       | 4263.3 (3162.6–5540.8)        | 14.5 (–8.3–40.6)        | 731.2 (486.1–1029.5)       | 105.9 (–57.6–322.9)        | 837.1 (519.1–1218.7)        |
| Latvia                                                  | 3811.9 (3187.6–4496.8)        | 694.9 (–204.0–1841.5)       | 4506.8 (3346.7–6011.9)        | 18.2 (–5.4–47.1)        | 748.7 (501.4–1037.4)       | 136.7 (–34.5–362.0)        | 885.4 (545.6–1325.2)        |

|                                  |                               |                              |                               |                         |                             |                            |                             |
|----------------------------------|-------------------------------|------------------------------|-------------------------------|-------------------------|-----------------------------|----------------------------|-----------------------------|
| Lithuania                        | 4135.3 (3501.1–4863.0)        | 1079.1 (–28.2–2331.6)        | 5214.4 (3913.7–6746.4)        | 26.1 (–0.7–54.7)        | 816.0 (540.4–1143.8)        | 213.2 (–7.0–500.7)         | 1029.3 (642.0–1558.8)       |
| Republic of Moldova              | 2923.1 (2449.7–3476.3)        | 1031.6 (214.7–2049.6)        | 3954.8 (2921.1–5201.4)        | 35.3 (7.1–69.4)         | 581.2 (386.2–834.5)         | 204.7 (39.6–417.8)         | 785.9 (494.1–1185.5)        |
| Russia                           | 2578.6 (2200.2–2998.8)        | 824.2 (671.0–1014.5)         | 3402.8 (2916.9–3983.6)        | 32.0 (27.2–37.1)        | 511.0 (347.8–717.9)         | 163.1 (108.3–233.0)        | 674.1 (461.9–947.9)         |
| Ukraine                          | 3918.9 (3346.4–4541.7)        | 1003.0 (105.1–2115.2)        | 4921.9 (3813.0–6341.2)        | 25.6 (2.6–52.4)         | 772.2 (528.9–1078.2)        | 196.9 (20.1–443.2)         | 969.1 (644.6–1460.1)        |
| <b>High-income</b>               | <b>3103.3 (2735.6–3526.4)</b> | <b>840.1 (671.7–1030.4)</b>  | <b>3943.3 (3466.9–4516.1)</b> | <b>27.1 (22.6–31.5)</b> | <b>620.5 (427.4–854.2)</b>  | <b>167.8 (107.9–239.3)</b> | <b>788.3 (544.7–1094.1)</b> |
| <b>Australasia</b>               | <b>3534.3 (3033.8–4146.3)</b> | <b>387.3 (–332.6–1233.2)</b> | <b>3921.6 (2968.5–4977.1)</b> | <b>10.9 (–9.5–35.2)</b> | <b>711.1 (487.8–1006.6)</b> | <b>78.2 (–66.6–263.5)</b>  | <b>789.3 (501.2–1179.8)</b> |
| Australia                        | 3700.1 (3155.6–4368.0)        | 422.0 (–424.4–1439.0)        | 4122.1 (3038.4–5361.3)        | 11.4 (–11.8–39.4)       | 744.2 (511.1–1055.2)        | 85.2 (–85.3–305.3)         | 829.4 (514.5–1266.1)        |
| New Zealand                      | 2697.2 (2336.4–3159.1)        | 228.7 (–300.1–827.7)         | 2925.9 (2248.6–3732.3)        | 8.5 (–11.7–30.7)        | 543.8 (379.1–762.4)         | 46.3 (–62.8–180.9)         | 590.1 (373.7–865.2)         |
| <b>High income Asia Pacific</b>  | <b>1807.6 (1590.8–2042.8)</b> | <b>198.3 (52.1–367.0)</b>    | <b>2005.9 (1736.2–2320.1)</b> | <b>11.0 (2.9–20.0)</b>  | <b>364.7 (253.5–506.2)</b>  | <b>40.0 (10.3–79.6)</b>    | <b>404.6 (281.5–566.7)</b>  |
| Brunei                           | 1067.3 (866.6–1303.0)         | 130.2 (–132.5–449.0)         | 1197.5 (869.1–1632.8)         | 12.2 (–12.4–40.7)       | 220.1 (143.8–320.1)         | 26.8 (–26.7–92.5)          | 246.9 (150.6–377.6)         |
| Japan                            | 1839.0 (1630.6–2065.8)        | 201.6 (96.1–313.9)           | 2040.6 (1804.6–2315.4)        | 11.0 (5.2–16.8)         | 370.0 (258.2–511.6)         | 40.5 (17.3–67.7)           | 410.5 (286.9–574.3)         |
| Singapore                        | 1622.2 (1391.2–1883.3)        | 278.9 (–110.4–758.4)         | 1901.1 (1460.7–2510.8)        | 17.2 (–6.1–45.8)        | 332.2 (226.3–465.9)         | 57.3 (–21.6–160.9)         | 389.6 (245.5–588.3)         |
| South Korea                      | 1758.7 (1508.4–2044.4)        | 182.7 (–249.4–658.0)         | 1941.4 (1470.0–2514.9)        | 10.4 (–13.8–37.7)       | 356.7 (241.0–503.0)         | 36.9 (–49.4–140.9)         | 393.6 (244.5–592.5)         |
| <b>High income North America</b> | <b>3509.0 (3132.7–3979.9)</b> | <b>1159.1 (914.4–1433.1)</b> | <b>4668.1 (4115.3–5340.2)</b> | <b>33.0 (27.2–39.5)</b> | <b>701.0 (490.2–965.6)</b>  | <b>231.3 (151.7–336.7)</b> | <b>932.4 (653.3–1302.8)</b> |
| Canada                           | 2392.4 (2040.0–2823.0)        | 560.2 (–56.2–1292.5)         | 2952.6 (2247.9–3871.9)        | 23.4 (–2.5–53.6)        | 484.5 (328.8–691.8)         | 113.3 (–12.5–285.2)        | 597.8 (383.0–883.6)         |
| Greenland                        | 5236.4 (4422.8–6200.8)        | 924.9 (–295.6–2357.0)        | 6161.3 (4696.8–8127.4)        | 17.7 (–5.5–43.5)        | 1063.2 (719.1–1501.3)       | 188.1 (–62.8–501.0)        | 1251.3 (795.4–1892.2)       |
| USA                              | 3633.1 (3243.2–4113.6)        | 1225.8 (971.4–1518.7)        | 4858.8 (4261.9–5537.4)        | 33.7 (27.4–40.6)        | 725.1 (508.2–999.3)         | 244.4 (156.8–351.9)        | 969.6 (680.6–1352.3)        |
| <b>Southern Latin America</b>    | <b>2361.0 (2068.1–2723.4)</b> | <b>981.4 (466.3–1580.1)</b>  | <b>3342.4 (2700.0–4110.9)</b> | <b>41.6 (20.2–66.1)</b> | <b>478.2 (328.2–666.7)</b>  | <b>198.4 (89.6–355.9)</b>  | <b>676.5 (445.3–983.5)</b>  |
| Argentina                        | 1992.3 (1767.8–2259.4)        | 888.6 (305.2–1610.1)         | 2880.9 (2220.1–3718.5)        | 44.6 (15.3–80.6)        | 404.6 (282.6–563.7)         | 180.4 (57.5–361.0)         | 585.0 (365.8–894.1)         |
| Chile                            | 3246.4 (2738.4–3890.1)        | 1316.8 (298.5–2444.1)        | 4563.2 (3357.8–5987.3)        | 40.6 (10.2–76.0)        | 655.1 (438.5–921.9)         | 264.4 (62.9–511.8)         | 919.5 (579.9–1381.8)        |
| Uruguay                          | 2521.4 (2132.7–2981.6)        | 425.6 (–166.2–1152.2)        | 2947.0 (2218.5–3840.1)        | 16.9 (–6.7–44.2)        | 507.4 (346.2–715.9)         | 85.4 (–31.7–236.5)         | 592.8 (370.8–871.8)         |
| <b>Western Europe</b>            | <b>3401.8 (2958.5–3902.2)</b> | <b>856.6 (585.4–1180.8)</b>  | <b>4258.4 (3685.5–4950.4)</b> | <b>25.2 (17.5–33.4)</b> | <b>678.2 (463.8–941.5)</b>  | <b>170.6 (98.3–258.7)</b>  | <b>848.8 (581.3–1203.3)</b> |
| Andorra                          | 3198.1 (2660.8–3865.6)        | 1154.1 (236.1–2317.4)        | 4352.2 (3216.3–5765.3)        | 36.0 (7.8–70.2)         | 642.4 (426.8–913.5)         | 232.0 (44.8–497.8)         | 874.4 (532.6–1309.6)        |
| Austria                          | 2280.8 (1950.8–2649.9)        | 539.1 (–34.2–1245.6)         | 2820.0 (2124.2–3690.2)        | 23.6 (–1.5–52.2)        | 456.2 (312.4–638.9)         | 107.0 (–6.1–255.0)         | 563.2 (363.9–823.7)         |
| Belgium                          | 3028.8 (2566.1–3549.1)        | 885.4 (111.8–1873.3)         | 3914.2 (2904.7–5094.2)        | 29.2 (3.4–60.9)         | 605.3 (404.9–843.4)         | 177.5 (18.6–399.3)         | 782.7 (482.4–1157.3)        |
| Cyprus                           | 2421.4 (2007.0–2913.2)        | 500.1 (–124.7–1184.0)        | 2921.5 (2157.3–3813.6)        | 20.7 (–5.5–49.3)        | 488.3 (326.4–692.6)         | 100.7 (–23.1–263.2)        | 589.0 (359.0–879.7)         |
| Denmark                          | 2901.3 (2441.1–3408.9)        | 490.7 (–221.0–1306.3)        | 3392.0 (2547.6–4417.2)        | 17.0 (–7.4–44.4)        | 579.8 (391.3–816.3)         | 98.1 (–42.2–271.8)         | 677.9 (419.2–998.2)         |
| Finland                          | 3671.5 (3149.9–4254.8)        | 391.3 (–422.9–1412.0)        | 4062.8 (3045.7–5275.4)        | 10.6 (–12.0–36.5)       | 734.5 (499.6–1043.3)        | 79.1 (–80.4–291.4)         | 813.7 (497.0–1231.7)        |
| France                           | 3349.9 (2848.9–3908.3)        | 1117.3 (155.2–2194.0)        | 4467.2 (3357.0–5866.7)        | 33.3 (4.7–64.9)         | 667.9 (457.5–938.8)         | 223.1 (27.2–486.5)         | 890.9 (553.7–1347.5)        |
| Germany                          | 2907.1 (2476.8–3402.7)        | 485.3 (–199.1–1280.7)        | 3392.3 (2561.7–4442.0)        | 16.7 (–7.0–44.3)        | 576.0 (389.9–808.1)         | 95.1 (–42.5–263.4)         | 671.1 (438.1–978.4)         |
| Greece                           | 4917.1 (4108.9–5845.3)        | 851.0 (–341.6–2186.4)        | 5768.1 (4248.5–7440.6)        | 17.3 (–7.8–43.6)        | 978.4 (662.8–1386.1)        | 169.9 (–66.0–453.5)        | 1148.2 (724.6–1705.6)       |
| Iceland                          | 2196.0 (1855.1–2604.0)        | 410.7 (–127.7–1041.4)        | 2606.7 (1971.9–3383.3)        | 18.7 (–5.8–47.7)        | 442.7 (296.2–619.9)         | 82.3 (–25.8–225.7)         | 525.0 (324.2–787.9)         |

|                                    |                               |                              |                               |                         |                            |                            |                            |
|------------------------------------|-------------------------------|------------------------------|-------------------------------|-------------------------|----------------------------|----------------------------|----------------------------|
| Ireland                            | 3687.3 (3227.7–4256.9)        | 977.0 (39.0–2049.4)          | 4664.3 (3578.2–6019.7)        | 26.5 (1.0–55.0)         | 741.0 (514.3–1015.2)       | 197.2 (7.7–426.3)          | 938.2 (574.1–1379.7)       |
| Israel                             | 3319.5 (2782.9–3951.5)        | 925.9 (63.0–1910.3)          | 4245.4 (3179.0–5508.5)        | 27.9 (1.9–55.8)         | 671.7 (450.7–949.1)        | 186.6 (12.0–418.7)         | 858.2 (542.9–1290.7)       |
| Italy                              | 3358.2 (2892.3–3863.9)        | 769.3 (494.8–1056.7)         | 4127.4 (3535.1–4826.5)        | 22.9 (14.8–30.6)        | 666.1 (457.3–928.6)        | 152.3 (85.5–227.7)         | 818.4 (554.6–1141.1)       |
| Luxembourg                         | 2597.5 (2275.6–3002.6)        | 739.9 (51.6–1568.5)          | 3337.4 (2577.9–4244.1)        | 28.5 (1.8–59.5)         | 521.0 (358.3–719.4)        | 147.7 (9.7–322.0)          | 668.7 (429.8–991.6)        |
| Malta                              | 2478.6 (2063.2–2966.0)        | 480.7 (–131.2–1230.3)        | 2959.3 (2203.6–3889.8)        | 19.4 (–5.2–49.9)        | 496.0 (333.2–710.5)        | 96.0 (–26.6–263.0)         | 592.0 (372.4–889.9)        |
| Monaco                             | 3718.7 (2981.3–4578.9)        | 750.1 (–159.5–1831.5)        | 4468.8 (3290.8–5910.3)        | 20.2 (–4.3–49.9)        | 741.5 (487.7–1076.6)       | 149.0 (–30.4–365.2)        | 890.5 (548.5–1320.4)       |
| Netherlands                        | 2997.4 (2515.6–3530.9)        | 821.1 (17.5–1764.3)          | 3818.6 (2890.9–5008.1)        | 27.4 (0.5–56.5)         | 601.7 (403.6–841.4)        | 164.6 (3.7–372.6)          | 766.3 (478.6–1139.3)       |
| Norway                             | 3135.4 (2695.0–3660.6)        | 530.2 (221.7–904.6)          | 3665.5 (3079.1–4346.1)        | 16.9 (7.2–27.8)         | 631.8 (429.7–882.6)        | 106.6 (37.6–196.9)         | 738.4 (493.9–1043.6)       |
| Portugal                           | 4469.6 (3767.5–5246.8)        | 1329.0 (131.7–2652.5)        | 5798.6 (4449.6–7423.9)        | 29.8 (3.0–58.1)         | 884.3 (597.8–1239.3)       | 263.0 (27.7–544.4)         | 1147.4 (721.2–1700.4)      |
| San Marino                         | 3740.8 (2993.6–4646.4)        | 1227.5 (171.6–2452.6)        | 4968.2 (3475.8–6610.3)        | 32.8 (4.6–63.8)         | 747.3 (495.6–1083.8)       | 245.2 (32.9–515.4)         | 992.5 (610.5–1520.4)       |
| Spain                              | 4071.6 (3457.4–4667.6)        | 1199.6 (124.2–2394.6)        | 5271.2 (3984.7–6604.2)        | 29.5 (3.1–60.1)         | 814.0 (553.7–1121.1)       | 240.2 (21.5–508.2)         | 1054.2 (660.5–1544.8)      |
| Sweden                             | 3683.5 (3218.3–4213.2)        | 904.2 (149.7–1735.1)         | 4587.7 (3648.0–5680.2)        | 24.5 (4.0–47.0)         | 738.4 (507.0–1026.9)       | 180.7 (28.8–377.3)         | 919.1 (611.0–1315.7)       |
| Switzerland                        | 3160.8 (2780.5–3590.0)        | 549.1 (–192.3–1414.7)        | 3709.9 (2841.9–4688.2)        | 17.4 (–6.1–44.2)        | 630.2 (430.8–876.1)        | 109.5 (–33.8–299.0)        | 739.7 (469.7–1080.8)       |
| UK                                 | 3641.1 (3157.3–4217.9)        | 1011.8 (827.3–1227.8)        | 4652.9 (4031.5–5393.2)        | 27.8 (24.0–31.7)        | 728.1 (495.7–1017.3)       | 202.1 (136.0–289.8)        | 930.2 (637.7–1290.8)       |
| <b>Latin America and Caribbean</b> | <b>2626.8 (2291.4–3034.4)</b> | <b>914.2 (737.4–1127.5)</b>  | <b>3541.0 (3063.3–4097.7)</b> | <b>34.8 (29.5–40.7)</b> | <b>527.5 (361.9–730.0)</b> | <b>183.5 (120.5–264.5)</b> | <b>711.0 (484.7–980.5)</b> |
| <b>Andean Latin America</b>        | <b>1776.3 (1488.1–2126.8)</b> | <b>1010.8 (581.4–1542.6)</b> | <b>2787.1 (2205.5–3476.2)</b> | <b>56.9 (33.4–82.1)</b> | <b>360.3 (242.1–515.6)</b> | <b>204.5 (106.5–343.8)</b> | <b>564.8 (368.4–825.2)</b> |
| Bolivia                            | 2360.1 (1951.9–2848.0)        | 1337.4 (429.7–2374.4)        | 3697.6 (2648.1–4979.0)        | 56.7 (19.4–99.0)        | 477.3 (316.6–679.8)        | 269.2 (88.6–515.4)         | 746.5 (465.5–1131.4)       |
| Ecuador                            | 2319.6 (1914.4–2778.8)        | 1240.5 (448.3–2194.9)        | 3560.0 (2604.9–4735.8)        | 53.5 (20.2–96.1)        | 471.7 (314.2–672.0)        | 251.4 (88.4–479.0)         | 723.1 (443.9–1074.2)       |
| Peru                               | 1292.8 (1080.3–1566.2)        | 780.3 (249.2–1517.5)         | 2073.1 (1459.7–2909.5)        | 60.3 (19.2–111.2)       | 262.0 (175.0–372.7)        | 158.1 (47.7–315.8)         | 420.2 (243.3–652.6)        |
| <b>Caribbean</b>                   | <b>2856.7 (2419.5–3403.3)</b> | <b>623.1 (295.0–1000.8)</b>  | <b>3479.8 (2874.5–4201.7)</b> | <b>21.8 (10.3–34.7)</b> | <b>573.4 (383.7–804.2)</b> | <b>125.0 (50.0–223.4)</b>  | <b>698.5 (464.2–993.8)</b> |
| Antigua and Barbuda                | 2320.5 (1904.0–2823.0)        | 458.7 (–109.9–1162.8)        | 2779.2 (2071.7–3656.2)        | 19.8 (–4.4–48.8)        | 466.6 (308.3–667.7)        | 92.4 (–19.4–247.1)         | 559.0 (350.8–850.3)        |
| Bahamas                            | 2270.0 (1856.5–2767.4)        | 885.7 (230.7–1718.8)         | 3155.7 (2314.3–4251.4)        | 39.0 (10.5–72.2)        | 458.3 (303.3–657.8)        | 178.6 (43.1–360.1)         | 636.8 (398.5–967.0)        |
| Barbados                           | 2674.1 (2252.6–3177.9)        | 438.1 (–172.2–1239.0)        | 3112.3 (2302.7–4066.3)        | 16.4 (–6.8–45.6)        | 534.2 (353.7–763.2)        | 87.6 (–35.3–258.3)         | 621.8 (382.6–938.4)        |
| Belize                             | 2196.1 (1798.0–2643.6)        | 913.2 (233.4–1749.5)         | 3109.3 (2271.3–4206.7)        | 41.5 (10.7–78.2)        | 447.0 (300.4–647.0)        | 185.5 (43.9–375.9)         | 632.5 (390.9–980.5)        |
| Bermuda                            | 2875.0 (2417.8–3425.3)        | 533.5 (–167.6–1267.4)        | 3408.5 (2568.4–4365.4)        | 18.6 (–5.4–43.5)        | 573.5 (381.8–811.2)        | 105.9 (–32.7–272.0)        | 679.5 (439.7–1001.2)       |
| Cuba                               | 3663.2 (3095.8–4323.7)        | 530.8 (–294.8–1521.6)        | 4194.1 (3243.6–5457.0)        | 14.5 (–7.9–41.1)        | 728.2 (482.5–1015.2)       | 105.4 (–55.4–307.1)        | 833.6 (526.8–1210.7)       |
| Dominica                           | 2376.0 (1979.1–2858.9)        | 433.7 (–172.3–1127.0)        | 2809.7 (2107.8–3752.6)        | 18.3 (–7.0–48.1)        | 476.0 (320.2–667.7)        | 86.9 (–32.9–239.4)         | 562.9 (348.3–855.3)        |
| Dominican Republic                 | 2849.2 (2366.9–3435.0)        | 954.8 (146.8–1966.8)         | 3804.0 (2817.6–5057.2)        | 33.5 (5.1–67.1)         | 576.8 (385.7–819.8)        | 193.1 (30.1–438.5)         | 770.0 (482.7–1172.1)       |
| Grenada                            | 2490.6 (2087.3–3011.9)        | 456.5 (–117.1–1144.5)        | 2947.1 (2210.8–3914.1)        | 18.3 (–4.7–45.7)        | 502.0 (330.5–717.4)        | 92.2 (–25.1–239.8)         | 594.3 (366.7–873.8)        |
| Guyana                             | 3931.7 (3289.8–4679.7)        | 1215.1 (194.2–2485.5)        | 5146.8 (3855.5–6745.8)        | 30.9 (5.2–62.1)         | 791.5 (537.9–1123.9)       | 244.3 (36.6–531.3)         | 1035.7 (662.9–1537.6)      |
| Haiti                              | 2307.0 (1882.9–2848.9)        | 397.8 (–129.0–1012.1)        | 2704.8 (1950.0–3577.1)        | 17.3 (–6.1–42.9)        | 464.9 (306.6–671.3)        | 80.2 (–29.7–218.8)         | 545.1 (331.4–825.1)        |
| Jamaica                            | 2263.2 (1876.1–2730.4)        | 474.6 (–102.0–1165.6)        | 2737.8 (1991.9–3526.4)        | 21.1 (–4.6–51.0)        | 457.7 (307.1–645.7)        | 96.2 (–20.3–245.3)         | 553.9 (340.7–814.0)        |

|                                     |                               |                              |                               |                         |                            |                            |                             |
|-------------------------------------|-------------------------------|------------------------------|-------------------------------|-------------------------|----------------------------|----------------------------|-----------------------------|
| Puerto Rico                         | 2370.0 (2000.6–2820.7)        | 595.8 (–52.5–1313.6)         | 2965.8 (2195.2–3899.6)        | 25.2 (–2.5–54.0)        | 471.2 (315.1–669.6)        | 118.0 (–9.4–277.5)         | 589.1 (365.6–861.3)         |
| Saint Kitts and Nevis               | 3487.2 (2757.9–4346.9)        | 614.1 (–219.0–1607.9)        | 4101.3 (2955.6–5466.8)        | 17.7 (–6.0–44.9)        | 701.0 (464.6–1035.9)       | 123.4 (–39.8–336.4)        | 824.4 (518.5–1258.3)        |
| Saint Lucia                         | 2702.9 (2273.1–3246.1)        | 508.0 (–117.9–1321.4)        | 3210.9 (2458.7–4241.2)        | 18.8 (–4.4–47.6)        | 541.6 (358.2–773.1)        | 102.0 (–24.1–271.1)        | 643.6 (404.1–964.6)         |
| Saint Vincent and the Grenadines    | 2616.4 (2196.2–3124.7)        | 477.8 (–180.2–1201.6)        | 3094.2 (2309.0–4027.4)        | 18.3 (–7.0–46.2)        | 525.5 (348.4–741.5)        | 96.5 (–39.3–261.8)         | 622.0 (383.4–941.8)         |
| Suriname                            | 3900.1 (3300.5–4638.6)        | 1020.6 (66.1–2158.7)         | 4920.7 (3703.9–6391.2)        | 26.2 (1.8–54.8)         | 783.8 (520.6–1125.0)       | 203.9 (13.0–445.1)         | 987.7 (618.1–1423.7)        |
| Trinidad and Tobago                 | 3207.1 (2691.4–3778.2)        | 651.4 (–138.9–1657.3)        | 3858.5 (2905.5–5110.7)        | 20.3 (–4.3–52.2)        | 642.5 (434.3–910.3)        | 131.3 (–27.1–349.5)        | 773.8 (477.7–1166.7)        |
| Virgin Islands                      | 2896.0 (2420.6–3446.3)        | 359.0 (–315.2–1138.2)        | 3255.0 (2424.8–4296.4)        | 12.4 (–11.0–39.1)       | 574.2 (381.7–818.6)        | 70.8 (–65.3–240.6)         | 645.0 (408.7–964.7)         |
| <b>Central Latin America</b>        | <b>2468.8 (2114.9–2881.0)</b> | <b>982.4 (768.8–1257.4)</b>  | <b>3451.2 (2935.0–4083.2)</b> | <b>39.8 (32.8–47.4)</b> | <b>498.0 (336.2–693.2)</b> | <b>198.1 (129.9–288.6)</b> | <b>696.1 (465.6–983.3)</b>  |
| Colombia                            | 1505.0 (1257.1–1814.5)        | 538.9 (85.0–1064.0)          | 2043.9 (1504.4–2763.1)        | 35.8 (5.6–69.2)         | 304.5 (203.3–444.1)        | 109.2 (16.4–229.7)         | 413.7 (255.4–619.2)         |
| Costa Rica                          | 2691.5 (2255.0–3214.9)        | 946.9 (178.8–1843.8)         | 3638.3 (2721.0–4779.4)        | 35.2 (6.7–68.7)         | 542.7 (361.0–766.3)        | 191.5 (34.4–420.6)         | 734.2 (449.4–1121.7)        |
| El Salvador                         | 2656.7 (2207.3–3216.6)        | 705.9 (46.3–1603.6)          | 3362.6 (2481.2–4503.7)        | 26.5 (1.8–59.3)         | 536.6 (358.7–772.5)        | 142.1 (9.2–330.3)          | 678.7 (418.3–1017.5)        |
| Guatemala                           | 2547.3 (2107.4–3086.3)        | 1061.3 (318.9–2026.5)        | 3608.6 (2677.3–4815.2)        | 41.7 (11.9–77.0)        | 512.5 (344.6–720.9)        | 213.3 (59.3–433.5)         | 725.8 (454.5–1096.2)        |
| Honduras                            | 2047.1 (1678.6–2503.8)        | 1039.9 (310.6–1922.1)        | 3087.0 (2245.9–4229.0)        | 50.7 (16.0–89.3)        | 414.1 (273.1–586.1)        | 210.3 (60.2–405.7)         | 624.4 (382.6–941.6)         |
| Mexico                              | 2829.9 (2456.4–3269.6)        | 1194.4 (934.8–1495.2)        | 4024.3 (3459.4–4685.7)        | 42.2 (34.8–50.6)        | 570.3 (387.2–788.3)        | 240.5 (152.2–350.0)        | 810.9 (543.6–1129.4)        |
| Nicaragua                           | 2352.0 (1946.9–2818.4)        | 692.0 (97.5–1427.4)          | 3044.0 (2260.3–4023.3)        | 29.4 (4.1–58.0)         | 477.6 (319.2–695.9)        | 140.9 (18.3–311.7)         | 618.5 (379.8–915.2)         |
| Panama                              | 2196.3 (1822.7–2673.6)        | 1235.7 (445.7–2221.8)        | 3432.0 (2463.8–4585.8)        | 56.3 (20.7–99.7)        | 443.6 (298.5–629.5)        | 250.1 (84.7–483.2)         | 693.7 (418.9–1059.6)        |
| Venezuela                           | 2571.3 (2145.1–3072.7)        | 816.2 (93.3–1645.3)          | 3387.6 (2508.9–4481.3)        | 31.8 (3.7–64.9)         | 518.6 (344.9–735.1)        | 164.7 (17.8–369.3)         | 683.3 (420.7–1039.9)        |
| <b>Tropical Latin America</b>       | <b>2996.6 (2659.6–3384.4)</b> | <b>872.1 (590.2–1157.6)</b>  | <b>3868.7 (3341.8–4426.3)</b> | <b>29.1 (20.5–38.2)</b> | <b>597.8 (414.2–823.2)</b> | <b>174.1 (103.2–262.2)</b> | <b>771.9 (531.0–1065.3)</b> |
| Brazil                              | 3022.1 (2683.2–3406.8)        | 875.1 (584.7–1167.1)         | 3897.2 (3376.5–4453.5)        | 29.0 (20.3–38.2)        | 602.7 (417.8–829.5)        | 174.6 (102.3–264.9)        | 777.3 (536.5–1069.8)        |
| Paraguay                            | 2230.3 (1856.3–2684.2)        | 783.8 (158.0–1543.2)         | 3014.1 (2224.5–4007.8)        | 35.1 (7.2–68.1)         | 451.0 (302.5–638.0)        | 158.9 (30.0–342.4)         | 609.9 (377.3–926.7)         |
| <b>North Africa and Middle East</b> | <b>3321.4 (2752.3–4013.2)</b> | <b>1235.2 (896.1–1642.5)</b> | <b>4556.6 (3729.1–5578.3)</b> | <b>37.2 (29.5–46.0)</b> | <b>674.1 (449.3–956.3)</b> | <b>250.5 (155.5–375.5)</b> | <b>924.6 (617.5–1311.6)</b> |
| Afghanistan                         | 3081.2 (2466.8–3836.6)        | 1091.5 (227.7–2101.7)        | 4172.8 (2941.5–5579.0)        | 35.4 (7.3–68.5)         | 625.9 (412.7–908.5)        | 222.5 (41.8–473.0)         | 848.3 (504.5–1310.4)        |
| Algeria                             | 3110.2 (2534.1–3806.1)        | 793.3 (19.9–1722.7)          | 3903.5 (2858.7–5181.0)        | 25.5 (0.6–54.1)         | 631.5 (417.0–905.5)        | 161.5 (3.4–384.7)          | 793.1 (488.0–1203.0)        |
| Bahrain                             | 4097.9 (3352.5–4993.4)        | 1169.4 (149.7–2492.1)        | 5267.3 (3856.2–7001.8)        | 28.5 (3.7–57.9)         | 833.8 (556.8–1190.0)       | 236.8 (27.5–536.0)         | 1070.6 (662.7–1595.2)       |
| Egypt                               | 2720.8 (2207.9–3348.5)        | 1164.3 (385.0–2204.3)        | 3885.1 (2845.0–5314.8)        | 42.8 (15.2–75.4)        | 554.9 (368.9–792.9)        | 237.4 (71.1–473.4)         | 792.3 (484.1–1202.0)        |
| Iran                                | 4031.8 (3315.5–4885.0)        | 1895.1 (1445.3–2446.1)       | 5927.0 (4847.6–7213.0)        | 47.0 (38.4–56.0)        | 812.4 (548.2–1154.6)       | 381.2 (238.9–564.1)        | 1193.6 (791.6–1677.3)       |
| Iraq                                | 2739.7 (2236.0–3362.0)        | 1144.0 (306.5–2149.0)        | 3883.7 (2793.9–5198.2)        | 41.7 (10.9–76.4)        | 557.3 (369.9–800.8)        | 231.2 (59.6–460.5)         | 788.6 (482.6–1174.9)        |
| Jordan                              | 2888.5 (2320.0–3579.3)        | 744.4 (7.4–1627.8)           | 3632.9 (2661.3–4918.0)        | 25.8 (0.3–53.2)         | 590.6 (386.1–841.9)        | 152.1 (1.3–341.4)          | 742.7 (454.1–1111.3)        |
| Kuwait                              | 3530.4 (2812.5–4370.3)        | 1293.1 (293.4–2491.5)        | 4823.5 (3541.0–6359.9)        | 36.7 (8.1–67.9)         | 718.5 (472.6–1039.8)       | 263.2 (57.3–540.7)         | 981.7 (602.2–1498.5)        |
| Lebanon                             | 3893.4 (3215.1–4760.7)        | 1087.9 (84.6–2207.3)         | 4981.4 (3596.1–6650.8)        | 27.9 (2.1–57.5)         | 783.0 (517.3–1126.4)       | 219.7 (15.0–492.9)         | 1002.7 (609.5–1531.0)       |
| Libya                               | 3767.8 (3012.6–4617.4)        | 1245.3 (192.0–2526.4)        | 5013.1 (3659.7–6666.7)        | 33.1 (4.9–64.8)         | 764.3 (508.8–1090.4)       | 251.7 (36.7–559.6)         | 1015.9 (622.6–1541.7)       |
| Morocco                             | 4279.2 (3544.7–5176.8)        | 1628.3 (389.6–3185.2)        | 5907.5 (4358.4–7809.9)        | 38.1 (9.2–72.3)         | 865.5 (578.8–1219.4)       | 329.5 (78.0–688.8)         | 1195.0 (759.9–1808.1)       |

|                                               |                               |                             |                               |                         |                            |                            |                             |
|-----------------------------------------------|-------------------------------|-----------------------------|-------------------------------|-------------------------|----------------------------|----------------------------|-----------------------------|
| Oman                                          | 3196.1 (2580.6–3991.5)        | 720.0 (–116.9–1656.0)       | 3916.1 (2790.5–5326.7)        | 22.5 (–3.5–52.2)        | 657.4 (429.6–945.6)        | 147.5 (–24.1–356.6)        | 804.9 (484.7–1198.0)        |
| Palestine                                     | 4674.5 (3769.3–5739.2)        | 1883.3 (543.0–3513.4)       | 6557.9 (4782.7–8698.0)        | 40.3 (11.6–73.0)        | 954.8 (627.3–1367.4)       | 384.9 (102.8–766.2)        | 1339.7 (809.2–1998.0)       |
| Qatar                                         | 3642.0 (2888.2–4595.6)        | 1346.0 (310.2–2631.0)       | 4988.1 (3571.5–6806.8)        | 37.0 (8.2–72.4)         | 750.4 (483.1–1075.6)       | 276.3 (57.8–584.3)         | 1026.7 (632.5–1560.5)       |
| Saudi Arabia                                  | 3583.0 (2899.8–4397.5)        | 1354.8 (296.0–2578.6)       | 4937.8 (3459.8–6712.1)        | 37.8 (8.4–71.9)         | 729.5 (484.2–1033.2)       | 275.6 (56.6–555.3)         | 1005.0 (591.9–1533.6)       |
| Sudan                                         | 2964.9 (2389.8–3655.8)        | 996.1 (214.3–1996.2)        | 3960.9 (2904.4–5470.8)        | 33.6 (7.2–64.7)         | 607.0 (396.6–874.3)        | 203.6 (41.0–451.5)         | 810.6 (494.0–1232.6)        |
| Syria                                         | 3263.7 (2621.8–3999.8)        | 750.7 (–82.5–1756.4)        | 4014.4 (2949.3–5260.1)        | 23.0 (–2.8–52.2)        | 658.8 (433.5–931.4)        | 152.1 (–14.9–377.5)        | 810.9 (488.6–1239.3)        |
| Tunisia                                       | 4750.6 (3921.1–5712.9)        | 1515.9 (204.2–3144.7)       | 6266.5 (4686.9–8297.2)        | 31.9 (4.4–65.1)         | 956.8 (643.4–1356.1)       | 305.1 (35.8–658.3)         | 1261.9 (800.0–1921.1)       |
| Turkey                                        | 3195.9 (2637.7–3852.9)        | 1270.9 (308.5–2456.2)       | 4466.9 (3225.1–5965.4)        | 39.8 (10.3–74.6)        | 648.2 (434.5–928.0)        | 257.4 (61.9–526.3)         | 905.6 (573.8–1340.7)        |
| United Arab Emirates                          | 3382.0 (2630.5–4315.3)        | 867.3 (–15.4–1976.7)        | 4249.3 (3080.7–5805.9)        | 25.7 (–0.5–54.3)        | 691.0 (449.4–1012.1)       | 177.2 (–3.1–412.6)         | 868.2 (521.2–1352.2)        |
| Yemen                                         | 3334.1 (2683.7–4168.4)        | 645.8 (–126.4–1563.7)       | 3980.0 (2943.8–5262.9)        | 19.4 (–3.8–47.1)        | 675.0 (446.3–980.3)        | 131.2 (–23.9–331.4)        | 806.1 (489.9–1205.1)        |
| <b>South Asia</b>                             | <b>2664.2 (2313.9–3099.5)</b> | <b>962.6 (761.6–1187.1)</b> | <b>3626.8 (3122.5–4232.7)</b> | <b>36.1 (29.7–42.8)</b> | <b>534.5 (364.5–745.9)</b> | <b>192.8 (127.1–278.6)</b> | <b>727.3 (493.3–1012.5)</b> |
| Bangladesh                                    | 3592.0 (3002.3–4307.7)        | 1390.5 (313.2–2757.5)       | 4982.4 (3673.3–6670.0)        | 38.7 (8.8–74.7)         | 724.6 (486.0–1015.8)       | 280.6 (60.8–593.4)         | 1005.2 (626.9–1551.2)       |
| Bhutan                                        | 2945.5 (2438.9–3573.7)        | 423.3 (–314.0–1312.3)       | 3368.8 (2474.2–4489.3)        | 14.4 (–10.5–44.1)       | 594.5 (393.6–844.0)        | 85.4 (–60.3–273.1)         | 679.9 (425.9–1017.3)        |
| India                                         | 2577.1 (2247.5–2983.1)        | 901.0 (712.0–1118.5)        | 3478.1 (3006.3–4065.6)        | 35.0 (28.5–41.9)        | 516.0 (353.7–713.7)        | 180.0 (116.9–261.1)        | 696.0 (475.4–971.8)         |
| Nepal                                         | 3638.2 (3112.0–4239.7)        | 1305.8 (292.2–2502.2)       | 4944.0 (3691.4–6494.2)        | 35.8 (7.9–66.8)         | 730.1 (490.4–1027.3)       | 262.7 (48.2–532.5)         | 992.8 (601.8–1475.1)        |
| Pakistan                                      | 2413.2 (2022.1–2874.2)        | 992.3 (554.5–1533.8)        | 3405.5 (2743.1–4262.3)        | 41.1 (23.1–62.8)        | 487.1 (329.9–688.7)        | 200.4 (97.3–343.7)         | 687.5 (449.8–1007.2)        |
| <b>Southeast Asia, east Asia, and Oceania</b> | <b>1707.8 (1492.4–1958.7)</b> | <b>195.8 (121.8–281.4)</b>  | <b>1903.6 (1656.1–2194.3)</b> | <b>11.5 (7.2–16.0)</b>  | <b>344.5 (236.4–481.1)</b> | <b>39.5 (21.3–62.7)</b>    | <b>383.9 (261.4–538.1)</b>  |
| <b>East Asia</b>                              | <b>1876.3 (1642.8–2156.0)</b> | <b>164.0 (63.8–271.8)</b>   | <b>2040.3 (1765.5–2352.9)</b> | <b>8.7 (3.5–14.1)</b>   | <b>376.3 (256.5–529.7)</b> | <b>32.8 (12.5–59.7)</b>    | <b>409.2 (280.8–577.2)</b>  |
| China                                         | 1889.0 (1655.0–2169.1)        | 167.3 (62.9–274.4)          | 2056.3 (1780.0–2364.6)        | 8.9 (3.3–14.5)          | 378.8 (258.5–533.0)        | 33.5 (12.7–60.9)           | 412.3 (283.3–581.6)         |
| North Korea                                   | 1527.2 (1292.8–1820.7)        | 78.0 (–264.9–523.9)         | 1605.3 (1175.1–2151.9)        | 5.1 (–17.5–34.0)        | 308.9 (204.4–437.2)        | 15.4 (–55.7–107.1)         | 324.3 (202.7–482.0)         |
| Taiwan (province of China)                    | 1503.4 (1271.1–1782.5)        | 67.7 (–291.3–483.4)         | 1571.1 (1143.0–2094.9)        | 4.5 (–19.9–33.5)        | 301.4 (199.0–430.5)        | 13.9 (–57.8–99.9)          | 315.4 (191.1–479.1)         |
| <b>Oceania</b>                                | <b>1570.6 (1288.1–1922.3)</b> | <b>25.6 (–276.6–392.6)</b>  | <b>1596.2 (1219.7–2109.9)</b> | <b>1.7 (–17.6–24.0)</b> | <b>322.3 (214.5–468.2)</b> | <b>5.4 (–57.2–85.0)</b>    | <b>327.7 (207.4–488.7)</b>  |
| American Samoa                                | 1289.4 (1074.4–1568.8)        | 141.0 (–151.9–509.6)        | 1430.4 (1061.0–1900.3)        | 10.9 (–12.3–38.6)       | 261.6 (175.3–373.1)        | 28.6 (–31.9–106.4)         | 290.2 (179.2–434.7)         |
| Cook Islands                                  | 2018.1 (1628.3–2509.6)        | 200.7 (–274.8–790.1)        | 2218.8 (1589.9–3049.3)        | 9.9 (–13.4–37.6)        | 405.5 (272.7–587.8)        | 40.7 (–51.3–165.4)         | 446.1 (272.0–690.3)         |
| Federated States of Micronesia                | 1515.8 (1250.4–1843.1)        | 44.2 (–317.3–486.2)         | 1560.0 (1133.5–2090.4)        | 3.0 (–20.8–31.8)        | 310.1 (207.0–443.2)        | 9.3 (–68.7–104.1)          | 319.5 (191.3–500.3)         |
| Fiji                                          | 1540.4 (1276.8–1841.3)        | 124.3 (–256.8–521.2)        | 1664.7 (1219.4–2204.1)        | 8.1 (–16.1–32.9)        | 313.4 (211.7–447.1)        | 25.3 (–55.0–109.7)         | 338.7 (209.4–513.7)         |
| Guam                                          | 1862.0 (1568.6–2238.3)        | 471.3 (–1.8–1059.1)         | 2333.3 (1734.3–3112.3)        | 25.3 (–0.1–55.5)        | 381.4 (256.3–544.4)        | 97.0 (–0.4–229.9)          | 478.3 (291.0–721.1)         |
| Kiribati                                      | 1464.5 (1200.3–1810.6)        | 74.3 (–274.8–463.0)         | 1538.8 (1141.4–2077.9)        | 5.1 (–18.0–32.1)        | 300.0 (202.1–429.9)        | 15.4 (–55.5–97.6)          | 315.4 (192.0–484.8)         |
| Marshall Islands                              | 1458.4 (1194.3–1772.7)        | 54.3 (–284.7–489.7)         | 1512.7 (1091.1–2060.5)        | 3.7 (–19.0–31.3)        | 298.0 (199.8–429.6)        | 11.2 (–55.5–102.8)         | 309.3 (189.2–482.1)         |
| Nauru                                         | 1638.5 (1264.3–2119.7)        | 199.2 (–207.4–649.7)        | 1837.7 (1268.7–2579.9)        | 12.1 (–12.7–38.6)       | 336.0 (215.4–500.2)        | 40.5 (–45.6–139.1)         | 376.5 (220.7–586.4)         |
| Niue                                          | 1952.3 (1568.2–2427.9)        | 184.5 (–286.9–774.2)        | 2136.8 (1542.5–2876.2)        | 9.5 (–14.5–38.0)        | 393.0 (262.9–578.7)        | 37.4 (–54.2–157.6)         | 430.4 (266.1–672.5)         |
| Northern Mariana Islands                      | 1679.3 (1392.7–1999.9)        | 332.0 (–72.6–841.7)         | 2011.3 (1505.6–2655.6)        | 19.8 (–4.1–48.6)        | 341.6 (228.6–485.4)        | 67.5 (–13.4–178.9)         | 409.1 (255.0–619.4)         |



|                                   |                               |                             |                               |                         |                             |                           |                             |
|-----------------------------------|-------------------------------|-----------------------------|-------------------------------|-------------------------|-----------------------------|---------------------------|-----------------------------|
| Palau                             | 2034.6 (1605.9–2561.2)        | 163.1 (–298.3–763.5)        | 2197.7 (1561.6–2971.1)        | 8.1 (–15.1–36.4)        | 410.3 (270.2–603.6)         | 32.7 (–60.4–153.4)        | 443.0 (269.7–684.2)         |
| Papua New Guinea                  | 1593.0 (1299.0–1956.8)        | 3.2 (–389.8–450.4)          | 1596.3 (1157.5–2188.9)        | 0.3 (–24.7–28.6)        | 327.3 (218.9–474.6)         | 0.8 (–80.4–98.8)          | 328.1 (200.8–501.2)         |
| Samoa                             | 1302.9 (1081.3–1597.5)        | 25.9 (–289.1–379.9)         | 1328.8 (971.4–1808.9)         | 2.0 (–21.2–29.8)        | 266.3 (174.3–381.7)         | 5.4 (–59.0–85.5)          | 271.7 (166.5–418.1)         |
| Solomon Islands                   | 1435.3 (1162.8–1762.7)        | 33.4 (–307.4–417.2)         | 1468.7 (1042.6–2060.2)        | 2.3 (–20.9–30.0)        | 294.9 (195.8–429.9)         | 6.9 (–64.1–98.7)          | 301.8 (185.4–469.4)         |
| Tokelau                           | 1784.5 (1428.7–2235.7)        | 187.1 (–239.7–684.6)        | 1971.6 (1396.4–2677.3)        | 10.4 (–13.3–37.7)       | 362.2 (239.2–530.6)         | 38.2 (–49.3–147.5)        | 400.4 (238.7–623.0)         |
| Tonga                             | 1218.7 (1014.2–1486.4)        | 136.8 (–164.5–487.0)        | 1355.5 (976.1–1814.3)         | 11.2 (–14.4–38.7)       | 249.3 (166.1–357.6)         | 27.9 (–34.0–102.8)        | 277.1 (168.1–421.6)         |
| Tuvalu                            | 1750.6 (1364.5–2217.7)        | 177.3 (–220.2–633.7)        | 1927.9 (1360.7–2647.1)        | 10.1 (–13.4–35.0)       | 357.0 (236.3–530.8)         | 36.1 (–43.6–132.6)        | 393.0 (238.8–601.0)         |
| Vanuatu                           | 1426.1 (1177.7–1751.1)        | 24.5 (–316.8–430.9)         | 1450.6 (1032.1–2044.3)        | 1.6 (–22.6–28.8)        | 292.9 (197.2–426.5)         | 4.8 (–65.5–89.6)          | 297.7 (179.9–464.7)         |
| <b>Southeast Asia</b>             | <b>1351.7 (1152.3–1598.1)</b> | <b>267.1 (178.5–375.9)</b>  | <b>1618.8 (1354.0–1939.6)</b> | <b>19.7 (13.5–26.1)</b> | <b>276.6 (187.4–389.1)</b>  | <b>54.7 (31.0–85.2)</b>   | <b>331.3 (222.4–468.2)</b>  |
| Cambodia                          | 1545.1 (1291.2–1861.3)        | 175.8 (–198.8–638.9)        | 1720.9 (1267.7–2309.8)        | 11.4 (–11.5–41.6)       | 316.8 (209.7–454.2)         | 36.4 (–38.6–138.7)        | 353.1 (215.4–541.7)         |
| Indonesia                         | 1164.7 (976.1–1373.3)         | 258.5 (159.6–378.3)         | 1423.2 (1180.6–1711.4)        | 22.2 (14.0–31.0)        | 239.6 (163.4–339.0)         | 53.1 (28.5–84.3)          | 292.7 (198.9–414.3)         |
| Laos                              | 1380.7 (1140.7–1672.7)        | 212.1 (–127.5–628.8)        | 1592.8 (1161.6–2135.1)        | 15.4 (–9.6–44.3)        | 285.4 (191.2–410.2)         | 43.9 (–26.4–137.8)        | 329.2 (200.8–483.6)         |
| Malaysia                          | 2081.4 (1733.9–2516.3)        | 281.8 (–191.9–873.9)        | 2363.2 (1711.8–3103.5)        | 13.5 (–8.8–42.6)        | 424.9 (285.3–606.8)         | 57.7 (–37.4–188.8)        | 482.6 (302.5–726.1)         |
| Maldives                          | 1735.2 (1433.8–2102.6)        | 466.0 (44.5–981.3)          | 2201.2 (1636.7–2936.5)        | 26.8 (2.6–55.0)         | 357.7 (238.7–500.2)         | 96.2 (8.1–228.2)          | 453.9 (285.7–704.7)         |
| Mauritius                         | 2960.8 (2487.0–3537.7)        | 405.1 (–309.7–1221.4)       | 3365.8 (2503.7–4391.6)        | 13.7 (–10.6–41.6)       | 596.0 (394.6–851.2)         | 81.7 (–60.9–256.0)        | 677.7 (428.2–1023.7)        |
| Myanmar                           | 918.7 (745.7–1126.2)          | 256.5 (12.0–549.7)          | 1175.2 (857.3–1573.2)         | 27.9 (1.4–56.8)         | 188.1 (124.9–268.5)         | 52.4 (2.3–121.4)          | 240.4 (146.6–360.7)         |
| Philippines                       | 1538.0 (1294.8–1817.4)        | 540.4 (419.2–681.4)         | 2078.5 (1740.5–2474.4)        | 35.1 (29.5–41.0)        | 315.5 (215.6–445.3)         | 110.8 (72.9–159.6)        | 426.3 (290.5–601.3)         |
| Seychelles                        | 1460.1 (1220.6–1754.3)        | 258.3 (–99.2–714.4)         | 1718.4 (1265.1–2311.6)        | 17.6 (–7.0–47.2)        | 297.7 (198.4–423.9)         | 52.7 (–20.1–153.6)        | 350.4 (216.8–540.1)         |
| Sri Lanka                         | 1622.5 (1382.7–1908.7)        | 321.9 (–62.5–794.7)         | 1944.4 (1490.5–2503.7)        | 19.9 (–4.1–47.2)        | 330.7 (222.5–467.6)         | 66.2 (–10.2–174.0)        | 396.9 (249.8–595.9)         |
| Thailand                          | 1867.6 (1577.0–2247.1)        | 132.4 (–294.9–685.5)        | 2000.0 (1459.6–2699.7)        | 7.1 (–16.4–36.5)        | 376.2 (254.7–538.2)         | 26.7 (–63.9–143.9)        | 402.9 (247.8–622.8)         |
| Timor–Leste                       | 1293.6 (1063.0–1591.8)        | 197.8 (–108.6–585.7)        | 1491.3 (1082.8–2034.1)        | 15.3 (–8.9–45.2)        | 266.2 (178.0–381.9)         | 40.7 (–22.9–130.8)        | 306.9 (193.9–468.0)         |
| Vietnam                           | 1159.0 (963.4–1391.4)         | 80.1 (–202.3–420.0)         | 1239.1 (888.6–1663.5)         | 6.9 (–17.8–35.3)        | 237.2 (157.1–338.6)         | 16.4 (–43.7–92.5)         | 253.7 (151.7–384.0)         |
| <b>Sub-Saharan Africa</b>         | <b>2429.0 (2048.0–2910.2)</b> | <b>559.0 (423.3–722.8)</b>  | <b>2988.0 (2513.5–3583.4)</b> | <b>23.0 (18.3–27.9)</b> | <b>492.7 (333.6–695.6)</b>  | <b>113.3 (71.2–168.7)</b> | <b>606.0 (408.5–857.1)</b>  |
| <b>Central sub-Saharan Africa</b> | <b>3506.1 (2867.9–4267.0)</b> | <b>770.9 (171.3–1499.7)</b> | <b>4277.1 (3326.6–5497.1)</b> | <b>22.0 (4.9–41.9)</b>  | <b>711.8 (474.7–1025.4)</b> | <b>156.7 (31.8–327.6)</b> | <b>868.5 (551.2–1262.3)</b> |
| Angola                            | 3504.5 (2843.4–4270.5)        | 757.0 (–91.6–1714.1)        | 4261.5 (3156.9–5540.9)        | 21.7 (–2.7–47.8)        | 713.8 (474.7–1037.9)        | 153.6 (–18.9–362.5)       | 867.4 (528.8–1287.7)        |
| Central African Republic          | 3921.2 (3214.0–4815.5)        | 694.3 (–260.4–1856.5)       | 4615.6 (3320.3–6217.7)        | 17.7 (–6.1–46.0)        | 793.2 (529.0–1143.5)        | 140.5 (–49.7–394.3)       | 933.7 (562.3–1467.6)        |
| Congo                             | 3952.9 (3233.8–4761.7)        | 913.4 (–27.5–2151.2)        | 4866.3 (3606.6–6545.3)        | 23.1 (–0.6–54.3)        | 801.9 (530.1–1155.4)        | 185.3 (–4.9–478.6)        | 987.2 (604.4–1501.4)        |
| Democratic Republic of the Congo  | 3436.4 (2799.6–4180.4)        | 771.2 (–65.1–1774.5)        | 4207.6 (3069.6–5639.4)        | 22.4 (–2.2–50.9)        | 697.0 (464.2–1005.9)        | 156.8 (–8.6–388.2)        | 853.9 (520.4–1283.7)        |
| Equatorial Guinea                 | 3921.3 (3163.1–4832.3)        | 866.7 (–36.5–2093.1)        | 4788.0 (3523.3–6367.6)        | 22.1 (–1.0–51.1)        | 799.9 (530.7–1148.6)        | 177.3 (–5.9–443.7)        | 977.2 (600.1–1488.9)        |
| Gabon                             | 4036.9 (3319.4–4869.0)        | 731.5 (–209.6–1889.7)       | 4768.3 (3590.8–6316.4)        | 18.1 (–5.5–45.7)        | 817.1 (542.9–1162.1)        | 148.3 (–43.2–404.2)       | 965.4 (599.2–1437.7)        |
| <b>Eastern sub-Saharan Africa</b> | <b>2541.3 (2137.0–3041.2)</b> | <b>521.0 (338.3–734.1)</b>  | <b>3062.4 (2542.1–3688.6)</b> | <b>20.5 (13.5–27.4)</b> | <b>517.0 (348.6–724.7)</b>  | <b>105.9 (60.4–168.1)</b> | <b>622.8 (419.5–876.8)</b>  |
| Burundi                           | 2375.5 (1940.3–2893.1)        | 233.9 (–302.8–921.3)        | 2609.5 (1935.1–3564.9)        | 9.8 (–12.5–36.7)        | 482.2 (317.5–686.7)         | 47.3 (–62.1–198.9)        | 529.5 (325.7–807.9)         |

|                                    |                               |                              |                               |                         |                            |                            |                             |
|------------------------------------|-------------------------------|------------------------------|-------------------------------|-------------------------|----------------------------|----------------------------|-----------------------------|
| Comoros                            | 2635.9 (2168.8–3176.8)        | 579.6 (–49.5–1356.6)         | 3215.5 (2438.4–4295.4)        | 22.0 (–1.8–49.4)        | 535.1 (353.6–769.4)        | 117.3 (–11.3–281.7)        | 652.4 (418.8–975.7)         |
| Djibouti                           | 2636.4 (2142.3–3223.6)        | 475.1 (–125.1–1239.1)        | 3111.5 (2267.9–4144.1)        | 18.0 (–4.5–45.6)        | 538.8 (351.3–782.6)        | 97.1 (–24.1–258.4)         | 635.9 (395.2–964.2)         |
| Eritrea                            | 2698.3 (2194.4–3302.1)        | 268.6 (–329.9–948.4)         | 2966.9 (2222.0–3926.8)        | 10.1 (–11.8–34.8)       | 548.1 (359.1–786.8)        | 54.7 (–66.8–204.3)         | 602.9 (374.1–901.0)         |
| Ethiopia                           | 2414.0 (2030.5–2866.5)        | 496.6 (186.0–835.6)          | 2910.6 (2386.3–3553.7)        | 20.6 (7.7–33.9)         | 492.5 (335.4–699.2)        | 101.4 (36.4–186.7)         | 593.9 (394.2–844.0)         |
| Kenya                              | 2618.2 (2270.3–3036.1)        | 890.6 (703.8–1109.1)         | 3508.8 (3006.7–4110.1)        | 34.0 (28.7–39.6)        | 532.7 (363.4–736.9)        | 180.9 (119.9–264.2)        | 713.6 (494.7–1001.2)        |
| Madagascar                         | 2540.9 (2082.2–3101.2)        | 488.0 (–171.8–1206.5)        | 3028.9 (2201.4–4110.0)        | 19.2 (–6.7–46.2)        | 519.6 (346.7–744.1)        | 99.6 (–34.0–267.3)         | 619.2 (367.1–935.9)         |
| Malawi                             | 1982.9 (1626.2–2416.1)        | 394.4 (–120.1–1007.5)        | 2377.3 (1740.5–3167.2)        | 19.9 (–6.0–49.9)        | 404.4 (267.5–575.2)        | 80.5 (–21.3–211.2)         | 484.9 (292.1–728.1)         |
| Mozambique                         | 2458.3 (2028.9–2974.8)        | 435.5 (–155.1–1231.4)        | 2893.8 (2137.0–3852.1)        | 17.7 (–6.3–48.2)        | 493.2 (327.0–703.4)        | 87.2 (–29.3–246.4)         | 580.4 (353.7–851.8)         |
| Rwanda                             | 2928.0 (2402.8–3574.0)        | 485.4 (–187.5–1315.4)        | 3413.3 (2483.6–4539.7)        | 16.6 (–5.9–44.4)        | 593.2 (393.1–849.0)        | 98.1 (–37.5–282.8)         | 691.2 (433.2–1039.2)        |
| Somalia                            | 2304.8 (1875.6–2872.7)        | 408.6 (–134.6–1076.2)        | 2713.4 (2024.7–3619.8)        | 17.8 (–6.0–44.9)        | 469.6 (309.5–671.9)        | 82.7 (–25.6–222.5)         | 552.3 (338.2–830.8)         |
| South Sudan                        | 2350.3 (1944.0–2880.2)        | 342.8 (–199.4–1016.7)        | 2693.1 (1968.1–3583.4)        | 14.6 (–8.5–41.2)        | 474.4 (316.5–669.6)        | 68.9 (–37.7–206.2)         | 543.2 (343.3–794.6)         |
| Uganda                             | 3578.5 (2889.6–4394.0)        | 759.9 (–70.8–1864.7)         | 4338.4 (3178.7–5781.0)        | 21.3 (–2.2–49.2)        | 729.7 (483.6–1036.4)       | 154.3 (–15.6–398.3)        | 884.0 (555.9–1354.2)        |
| Tanzania                           | 2403.3 (1976.1–2929.0)        | 432.7 (–116.8–1102.8)        | 2836.1 (2124.9–3744.8)        | 18.0 (–4.9–45.5)        | 488.4 (321.7–691.9)        | 87.8 (–23.1–230.2)         | 576.1 (355.7–861.4)         |
| Zambia                             | 2031.4 (1661.5–2472.2)        | 254.1 (–223.3–845.6)         | 2285.5 (1685.1–3035.9)        | 12.5 (–11.2–40.8)       | 412.5 (271.3–594.7)        | 51.7 (–44.7–181.0)         | 464.2 (285.8–703.2)         |
| <b>Southern sub-Saharan Africa</b> | <b>2807.3 (2428.2–3292.9)</b> | <b>1066.6 (742.0–1437.2)</b> | <b>3874.0 (3255.2–4609.8)</b> | <b>38.0 (27.1–48.6)</b> | <b>560.7 (387.3–774.8)</b> | <b>212.9 (128.1–330.1)</b> | <b>773.6 (523.5–1094.1)</b> |
| Botswana                           | 2914.5 (2400.3–3561.3)        | 371.9 (–277.5–1174.5)        | 3286.4 (2418.1–4397.9)        | 12.7 (–9.7–40.4)        | 584.9 (390.1–840.7)        | 75.1 (–54.4–245.1)         | 660.0 (410.6–1003.9)        |
| Eswatini                           | 2786.4 (2282.6–3383.1)        | 1010.4 (241.5–2029.4)        | 3796.8 (2784.0–5138.3)        | 36.2 (8.5–68.6)         | 558.6 (376.1–802.3)        | 202.7 (41.8–435.0)         | 761.3 (470.1–1169.5)        |
| Lesotho                            | 4005.4 (3301.3–4866.8)        | 984.6 (–61.5–2123.5)         | 4990.0 (3700.5–6573.2)        | 24.6 (–1.5–54.0)        | 798.0 (538.8–1133.4)       | 195.9 (–11.1–455.1)        | 994.0 (628.1–1487.5)        |
| Namibia                            | 2121.0 (1753.8–2547.0)        | 620.8 (35.9–1302.0)          | 2741.8 (2005.5–3655.3)        | 29.2 (1.7–59.9)         | 429.0 (290.0–613.8)        | 125.6 (8.2–271.5)          | 554.6 (343.7–830.3)         |
| South Africa                       | 3129.4 (2725.7–3629.0)        | 1335.6 (896.3–1816.5)        | 4465.0 (3741.7–5286.2)        | 42.7 (30.0–55.6)        | 624.1 (431.2–865.3)        | 266.2 (155.1–415.0)        | 890.2 (603.4–1259.3)        |
| Zimbabwe                           | 1564.0 (1276.3–1915.5)        | 306.3 (–67.3–793.7)          | 1870.3 (1365.9–2450.9)        | 19.6 (–4.9–47.4)        | 315.3 (211.3–458.5)        | 61.7 (–14.3–160.4)         | 377.0 (232.1–572.2)         |
| <b>Western sub-Saharan Africa</b>  | <b>1967.1 (1652.6–2360.3)</b> | <b>448.9 (335.7–591.8)</b>   | <b>2416.0 (2030.7–2892.0)</b> | <b>22.8 (17.8–27.9)</b> | <b>399.3 (270.3–561.0)</b> | <b>90.9 (56.9–134.0)</b>   | <b>490.2 (331.6–700.0)</b>  |
| Benin                              | 2161.7 (1775.8–2630.8)        | 221.9 (–286.7–821.7)         | 2383.6 (1740.9–3203.4)        | 10.3 (–13.2–36.8)       | 439.4 (287.8–622.4)        | 44.7 (–60.8–176.2)         | 484.1 (297.9–724.9)         |
| Burkina Faso                       | 2107.2 (1736.0–2560.2)        | 246.1 (–232.8–802.3)         | 2353.3 (1747.3–3172.5)        | 11.7 (–11.5–37.9)       | 429.5 (285.4–616.0)        | 50.2 (–47.6–171.6)         | 479.8 (302.2–729.0)         |
| Cabo Verde                         | 3556.9 (2961.3–4272.4)        | 1652.0 (448.7–2968.1)        | 5209.0 (3822.5–6790.3)        | 46.5 (12.1–82.5)        | 721.7 (484.8–1008.4)       | 334.0 (90.1–620.6)         | 1055.8 (650.9–1584.1)       |
| Cameroon                           | 2405.4 (1966.5–2944.5)        | 285.7 (–274.9–980.1)         | 2691.1 (1938.3–3611.5)        | 11.9 (–11.1–38.6)       | 488.8 (326.0–697.3)        | 58.2 (–56.2–191.1)         | 546.9 (330.2–807.5)         |
| Chad                               | 2471.5 (2002.4–3040.4)        | 356.8 (–200.9–1050.2)        | 2828.3 (2086.3–3803.6)        | 14.5 (–8.7–41.4)        | 502.1 (333.6–713.2)        | 72.7 (–45.2–223.3)         | 574.9 (354.2–862.0)         |
| Côte d'Ivoire                      | 1949.9 (1589.8–2370.8)        | 240.4 (–221.3–795.2)         | 2190.3 (1613.4–2997.4)        | 12.3 (–11.6–40.7)       | 396.4 (262.5–567.8)        | 49.1 (–46.4–171.4)         | 445.5 (275.0–683.7)         |
| The Gambia                         | 3168.1 (2579.5–3874.0)        | 613.8 (–152.9–1550.4)        | 3781.9 (2762.3–5115.4)        | 19.4 (–4.8–46.4)        | 639.5 (422.8–912.8)        | 124.2 (–28.6–321.0)        | 763.7 (475.4–1158.9)        |
| Ghana                              | 2542.4 (2091.1–3107.9)        | 438.4 (–149.8–1167.9)        | 2980.8 (2231.1–3958.2)        | 17.2 (–6.0–45.1)        | 516.9 (341.1–747.0)        | 88.6 (–28.6–249.1)         | 605.4 (373.0–909.1)         |
| Guinea                             | 2205.6 (1820.0–2693.8)        | 375.9 (–166.9–1025.8)        | 2581.5 (1919.9–3391.4)        | 17.1 (–7.3–47.3)        | 447.8 (300.9–637.3)        | 74.7 (–38.3–209.4)         | 522.5 (335.8–778.6)         |
| Guinea-Bissau                      | 2260.8 (1845.6–2786.7)        | 393.5 (–150.8–1085.1)        | 2654.3 (1966.6–3557.2)        | 17.4 (–7.1–47.3)        | 459.0 (304.0–658.0)        | 79.7 (–32.8–230.2)         | 538.8 (340.5–809.6)         |

|                       |                        |                       |                        |                   |                     |                    |                     |
|-----------------------|------------------------|-----------------------|------------------------|-------------------|---------------------|--------------------|---------------------|
| Liberia               | 2508.1 (2040.2–3078.3) | 427.4 (–157.6–1238.9) | 2935.6 (2176.2–3967.2) | 17.1 (–6.4–46.6)  | 498.8 (329.8–705.2) | 85.5 (–30.5–252.4) | 584.3 (357.4–890.4) |
| Mali                  | 1519.1 (1237.9–1869.3) | 310.0 (–68.3–747.1)   | 1829.1 (1319.2–2441.0) | 20.3 (–4.8–48.9)  | 309.3 (205.0–441.6) | 63.0 (–13.7–167.8) | 372.3 (228.3–563.1) |
| Mauritania            | 1845.6 (1523.8–2252.5) | 426.5 (–35.2–945.4)   | 2272.1 (1700.3–3012.8) | 23.1 (–1.8–51.6)  | 376.6 (248.9–539.4) | 87.3 (–6.3–205.5)  | 463.9 (283.4–701.7) |
| Niger                 | 1792.8 (1469.3–2213.8) | 204.3 (–227.2–714.0)  | 1997.1 (1465.9–2659.3) | 11.4 (–13.0–37.9) | 366.3 (242.4–528.2) | 41.4 (–47.0–151.7) | 407.7 (250.4–615.1) |
| Nigeria               | 1735.1 (1467.2–2043.5) | 578.6 (454.7–731.2)   | 2313.7 (1952.3–2757.4) | 33.3 (27.8–39.0)  | 351.6 (240.8–495.1) | 117.0 (76.4–168.8) | 468.6 (317.6–650.6) |
| São Tomé and Príncipe | 2093.4 (1707.9–2582.5) | 433.2 (–93.9–1071.3)  | 2526.5 (1827.6–3390.7) | 20.7 (–4.5–48.8)  | 427.6 (281.4–618.7) | 88.5 (–18.0–231.1) | 516.1 (319.3–794.8) |
| Senegal               | 2115.0 (1757.4–2585.7) | 615.5 (50.2–1324.4)   | 2730.6 (2033.6–3651.3) | 29.1 (2.6–59.8)   | 428.9 (285.1–611.7) | 124.3 (10.0–267.6) | 553.2 (342.4–817.4) |
| Sierra Leone          | 2373.9 (1947.2–2921.7) | 374.1 (–206.6–1020.0) | 2748.0 (2025.2–3618.9) | 15.8 (–9.3–43.4)  | 481.3 (319.3–692.6) | 75.5 (–43.7–227.7) | 556.8 (349.5–832.4) |
| Togo                  | 2489.1 (2041.6–3015.4) | 336.0 (–228.6–1029.0) | 2825.1 (2104.5–3767.3) | 13.6 (–9.0–41.7)  | 505.9 (333.8–720.7) | 67.9 (–47.5–213.2) | 573.8 (362.8–860.9) |

**Table S7: Prevalence and DALYs of MDD in 1000s, with 95% uncertainty intervals, by location, for the year 2020**

| Location                                                | Baseline prevalence           | Additional prevalence      | Final prevalence              | % change                | Baseline DALYs             | Additional DALYs          | Final DALYs                |
|---------------------------------------------------------|-------------------------------|----------------------------|-------------------------------|-------------------------|----------------------------|---------------------------|----------------------------|
| <b>Global</b>                                           | <b>193000 (167000–224000)</b> | <b>53200 (44800–62900)</b> | <b>246000 (212000–285000)</b> | <b>27.6 (25.1–30.3)</b> | <b>38700 (26400–53900)</b> | <b>10700 (7210–14900)</b> | <b>49400 (33600–68700)</b> |
| <b>Central Europe, eastern Europe, and central Asia</b> | <b>10600 (9200–12300)</b>     | <b>3120 (2440–3960)</b>    | <b>13700 (11800–16000)</b>    | <b>29.4 (23.9–35.8)</b> | <b>2110 (1440–2970)</b>    | <b>619 (409–890)</b>      | <b>2730 (1860–3820)</b>    |
| <b>Central Asia</b>                                     | <b>2040 (1720–2440)</b>       | <b>708 (413–1050)</b>      | <b>2740 (2240–3380)</b>       | <b>34.7 (21.8–49.2)</b> | <b>413 (279–584)</b>       | <b>143 (75.4–233)</b>     | <b>557 (363–789)</b>       |
| Armenia                                                 | 73.1 (61.6–87.1)              | 26.6 (4.64–52)             | 99.7 (73.5–131)               | 36.4 (6.3–70.4)         | 14.6 (9.74–20.8)           | 5.31 (0.937–11)           | 19.9 (12.3–29.6)           |
| Azerbaijan                                              | 192 (160–230)                 | 66.8 (13.8–132)            | 259 (194–344)                 | 34.8 (7.7–67.5)         | 39 (26.1–55.4)             | 13.5 (2.87–28.2)          | 52.5 (33.1–79.4)           |
| Georgia                                                 | 112 (94.5–133)                | 30.9 (0.999–67.2)          | 143 (107–188)                 | 27.5 (0.9–59.1)         | 22.3 (14.9–31.4)           | 6.11 (0.161–13.9)         | 28.4 (17.5–41.9)           |
| Kazakhstan                                              | 459 (390–542)                 | 161 (28.8–310)             | 619 (459–812)                 | 35.0 (6.4–67.9)         | 92.5 (62.9–131)            | 32.3 (5.82–65.2)          | 125 (79.3–181)             |
| Kyrgyzstan                                              | 148 (125–177)                 | 75.6 (23.4–142)            | 223 (164–301)                 | 51.2 (16.2–91.9)        | 30.2 (20.2–43)             | 15.4 (4.69–31.1)          | 45.6 (27.7–70.1)           |
| Mongolia                                                | 101 (85.2–121)                | 2.17 (–21.3–30.5)          | 103 (75.7–138)                | 2.2 (–20.1–30.1)        | 20.5 (13.6–29.1)           | 0.425 (–4.5–6.3)          | 21 (13.1–31.7)             |
| Tajikistan                                              | 148 (122–181)                 | 57.3 (14.6–111)            | 206 (152–272)                 | 38.6 (9.9–74.0)         | 30.3 (20.2–43)             | 11.7 (2.96–23.4)          | 42 (25.8–63.5)             |
| Turkmenistan                                            | 100 (84.1–121)                | 37.5 (7.99–73.5)           | 138 (101–185)                 | 37.5 (8.1–73.1)         | 20.4 (13.4–29.4)           | 7.65 (1.55–16.7)          | 28.1 (17.3–42.3)           |
| Uzbekistan                                              | 704 (583–855)                 | 250 (48.3–497)             | 954 (700–1260)                | 35.5 (6.9–68.4)         | 144 (96.2–203)             | 51 (9.24–109)             | 195 (119–290)              |
| <b>Central Europe</b>                                   | <b>2370 (2040–2750)</b>       | <b>590 (401–830)</b>       | <b>2960 (2520–3470)</b>       | <b>24.9 (17.1–34.6)</b> | <b>468 (318–650)</b>       | <b>116 (67.9–179)</b>     | <b>585 (396–807)</b>       |
| Albania                                                 | 45.6 (38.5–54.2)              | 17.6 (3.35–36.4)           | 63.2 (46.3–84.6)              | 38.7 (7.2–76.9)         | 9.14 (6.15–13)             | 3.55 (0.671–7.71)         | 12.7 (7.6–19.1)            |
| Bosnia and Herzegovina                                  | 77 (64.4–92.6)                | 21.2 (1.42–43.8)           | 98.2 (74.4–127)               | 27.6 (1.9–56.8)         | 15.2 (10–21.4)             | 4.15 (0.354–9.42)         | 19.3 (12.3–28.8)           |
| Bulgaria                                                | 165 (136–196)                 | 38.6 (–3.37–90.2)          | 204 (154–267)                 | 23.5 (–2.0–53.0)        | 32.3 (21.6–45.3)           | 7.57 (–0.629–18)          | 39.9 (25.4–59.2)           |
| Croatia                                                 | 117 (98.1–139)                | 23.3 (–3.65–57.3)          | 141 (104–184)                 | 19.8 (–3.4–47.9)        | 23 (15.6–32.2)             | 4.58 (–0.811–12)          | 27.6 (17.4–42)             |
| Czechia                                                 | 265 (224–313)                 | 62 (–7.02–138)             | 327 (246–422)                 | 23.5 (–2.5–52.9)        | 51.9 (35.2–73)             | 12.1 (–1.21–28.3)         | 64.1 (40.9–91.4)           |
| Hungary                                                 | 248 (209–297)                 | 35.6 (–22.3–98.2)          | 284 (215–370)                 | 14.3 (–8.4–39.4)        | 48.6 (32.7–68.4)           | 6.98 (–4.28–20.9)         | 55.6 (34–81.7)             |
| Montenegro                                              | 13.8 (11.7–16.7)              | 4.46 (0.357–8.96)          | 18.3 (13.6–23.9)              | 32.2 (2.5–63.4)         | 2.75 (1.84–3.82)           | 0.883 (0.0577–1.84)       | 3.63 (2.22–5.24)           |
| North Macedonia                                         | 40.8 (34–48.8)                | 14.9 (3.71–29.5)           | 55.7 (41.4–73.2)              | 36.5 (9.3–70.1)         | 8.1 (5.41–11.3)            | 2.95 (0.676–6.01)         | 11.1 (6.9–16.4)            |
| Poland                                                  | 597 (509–697)                 | 145 (96.3–204)             | 742 (625–875)                 | 24.3 (16.6–32.8)        | 119 (81.7–167)             | 28.7 (17.2–44.2)          | 147 (102–206)              |
| Romania                                                 | 410 (344–484)                 | 133 (19.3–275)             | 542 (407–715)                 | 32.4 (4.7–67.2)         | 81.1 (54.1–113)            | 26.2 (3.83–59.7)          | 107 (67.2–158)             |
| Serbia                                                  | 211 (176–251)                 | 52.5 (–0.0897–117)         | 263 (199–344)                 | 24.8 (–0.0–55.3)        | 41.5 (27.9–57.9)           | 10.3 (–0.0191–24.4)       | 51.9 (32.6–77.1)           |
| Slovakia                                                | 121 (100–143)                 | 28.6 (–2.57–65.1)          | 149 (110–198)                 | 23.8 (–2.3–52.9)        | 23.9 (15.6–33.6)           | 5.64 (–0.483–13.6)        | 29.5 (19–43.5)             |
| Slovenia                                                | 61.6 (52–73.1)                | 14.1 (–0.923–32.2)         | 75.6 (57–99.1)                | 22.8 (–1.6–51.0)        | 12.1 (8.16–17)             | 2.74 (–0.164–6.51)        | 14.8 (9.22–21.9)           |
| <b>Eastern Europe</b>                                   | <b>6190 (5330–7150)</b>       | <b>1820 (1340–2470)</b>    | <b>8020 (6830–9430)</b>       | <b>29.4 (22.1–38.3)</b> | <b>1230 (838–1710)</b>     | <b>360 (229–547)</b>      | <b>1590 (1090–2250)</b>    |
| Belarus                                                 | 346 (294–406)                 | 85.5 (–1.52–189)           | 432 (322–557)                 | 24.7 (–0.5–54.0)        | 68.7 (46.1–95.9)           | 16.9 (–0.245–39.5)        | 85.6 (54.1–126)            |
| Estonia                                                 | 48.9 (40.5–57.8)              | 7.09 (–4.07–20.2)          | 56 (41.5–72.8)                | 14.5 (–8.3–40.6)        | 9.61 (6.38–13.5)           | 1.39 (–0.757–4.24)        | 11 (6.82–16)               |
| Latvia                                                  | 72.3 (60.5–85.3)              | 13.2 (–3.87–34.9)          | 85.5 (63.5–114)               | 18.2 (–5.4–47.1)        | 14.2 (9.51–19.7)           | 2.59 (–0.655–6.87)        | 16.8 (10.4–25.1)           |

|                                  |                            |                          |                            |                         |                         |                          |                          |
|----------------------------------|----------------------------|--------------------------|----------------------------|-------------------------|-------------------------|--------------------------|--------------------------|
| Lithuania                        | 114 (96.8–134)             | 29.8 (–0.781–64.5)       | 144 (108–187)              | 26.1 (–0.7–54.7)        | 22.6 (14.9–31.6)        | 5.9 (–0.192–13.8)        | 28.5 (17.7–43.1)         |
| Republic of Moldova              | 106 (89.2–127)             | 37.6 (7.82–74.6)         | 144 (106–189)              | 35.3 (7.1–69.4)         | 21.2 (14.1–30.4)        | 7.45 (1.44–15.2)         | 28.6 (18–43.2)           |
| Russia                           | 3780 (3220–4390)           | 1210 (983–1490)          | 4990 (4270–5840)           | 32.0 (27.2–37.1)        | 749 (510–1050)          | 239 (159–341)            | 988 (677–1390)           |
| Ukraine                          | 1730 (1480–2000)           | 442 (46.3–932)           | 2170 (1680–2800)           | 25.6 (2.6–52.4)         | 340 (233–475)           | 86.8 (8.84–195)          | 427 (284–644)            |
| <b>High-income</b>               | <b>33700 (29700–38300)</b> | <b>9130 (7300–11200)</b> | <b>42900 (37700–49100)</b> | <b>27.1 (22.6–31.5)</b> | <b>6740 (4650–9280)</b> | <b>1820 (1170–2600)</b>  | <b>8570 (5920–11900)</b> |
| <b>Australasia</b>               | <b>1060 (906–1240)</b>     | <b>116 (–99.3–368)</b>   | <b>1170 (886–1490)</b>     | <b>10.9 (–9.5–35.2)</b> | <b>212 (146–301)</b>    | <b>23.4 (–19.9–78.7)</b> | <b>236 (150–352)</b>     |
| Australia                        | 920 (784–1090)             | 105 (–105–358)           | 1020 (755–1330)            | 11.4 (–11.8–39.4)       | 185 (127–262)           | 21.2 (–21.2–75.9)        | 206 (128–315)            |
| New Zealand                      | 135 (117–158)              | 11.4 (–15–41.4)          | 146 (113–187)              | 8.5 (–11.7–30.7)        | 27.2 (19–38.2)          | 2.32 (–3.14–9.05)        | 29.5 (18.7–43.3)         |
| <b>High income Asia Pacific</b>  | <b>3380 (2970–3820)</b>    | <b>371 (97.4–686)</b>    | <b>3750 (3240–4340)</b>    | <b>11.0 (2.9–20.0)</b>  | <b>682 (474–946)</b>    | <b>74.7 (19.2–149)</b>   | <b>756 (526–1060)</b>    |
| Brunei                           | 4.76 (3.87–5.81)           | 0.581 (–0.591–2)         | 5.34 (3.88–7.28)           | 12.2 (–12.4–40.7)       | 0.982 (0.642–1.43)      | 0.119 (–0.119–0.413)     | 1.1 (0.672–1.68)         |
| Japan                            | 2340 (2080–2630)           | 257 (122–400)            | 2600 (2300–2950)           | 11.0 (5.2–16.8)         | 471 (329–651)           | 51.6 (22–86.1)           | 523 (365–731)            |
| Singapore                        | 92.4 (79.2–107)            | 15.9 (–6.29–43.2)        | 108 (83.2–143)             | 17.2 (–6.1–45.8)        | 18.9 (12.9–26.5)        | 3.27 (–1.23–9.17)        | 22.2 (14–33.5)           |
| South Korea                      | 940 (806–1090)             | 97.6 (–133–352)          | 1040 (785–1340)            | 10.4 (–13.8–37.7)       | 191 (129–269)           | 19.7 (–26.4–75.3)        | 210 (131–317)            |
| <b>High income North America</b> | <b>12900 (11500–14600)</b> | <b>4250 (3350–5250)</b>  | <b>17100 (15100–19600)</b> | <b>33.0 (27.2–39.5)</b> | <b>2570 (1800–3540)</b> | <b>848 (556–1230)</b>    | <b>3420 (2390–4770)</b>  |
| Canada                           | 878 (749–1040)             | 206 (–20.6–474)          | 1080 (825–1420)            | 23.4 (–2.5–53.6)        | 178 (121–254)           | 41.6 (–4.59–105)         | 219 (141–324)            |
| Greenland                        | 2.94 (2.48–3.48)           | 0.52 (–0.166–1.32)       | 3.46 (2.64–4.57)           | 17.7 (–5.5–43.5)        | 0.597 (0.404–0.843)     | 0.106 (–0.0353–0.281)    | 0.703 (0.447–1.06)       |
| USA                              | 12000 (10700–13600)        | 4040 (3200–5010)         | 16000 (14000–18300)        | 33.7 (27.4–40.6)        | 2390 (1680–3290)        | 806 (517–1160)           | 3200 (2240–4460)         |
| <b>Southern Latin America</b>    | <b>1590 (1390–1830)</b>    | <b>659 (313–1060)</b>    | <b>2250 (1810–2760)</b>    | <b>41.6 (20.2–66.1)</b> | <b>321 (220–448)</b>    | <b>133 (60.2–239)</b>    | <b>454 (299–661)</b>     |
| Argentina                        | 905 (803–1030)             | 404 (139–732)            | 1310 (1010–1690)           | 44.6 (15.3–80.6)        | 184 (128–256)           | 82 (26.1–164)            | 266 (166–406)            |
| Chile                            | 594 (501–712)              | 241 (54.6–447)           | 835 (614–1100)             | 40.6 (10.2–76.0)        | 120 (80.2–169)          | 48.4 (11.5–93.6)         | 168 (106–253)            |
| Uruguay                          | 86.8 (73.4–103)            | 14.6 (–5.72–39.6)        | 101 (76.3–132)             | 16.9 (–6.7–44.2)        | 17.5 (11.9–24.6)        | 2.94 (–1.09–8.14)        | 20.4 (12.8–30)           |
| <b>Western Europe</b>            | <b>14900 (12900–17000)</b> | <b>3740 (2560–5150)</b>  | <b>18600 (16100–21600)</b> | <b>25.2 (17.5–33.4)</b> | <b>2960 (2020–4110)</b> | <b>745 (429–1130)</b>    | <b>3710 (2540–5250)</b>  |
| Andorra                          | 2.7 (2.25–3.26)            | 0.974 (0.199–1.96)       | 3.67 (2.72–4.87)           | 36.0 (7.8–70.2)         | 0.542 (0.36–0.771)      | 0.196 (0.0378–0.42)      | 0.738 (0.45–1.11)        |
| Austria                          | 204 (175–237)              | 48.3 (–3.07–112)         | 253 (190–331)              | 23.6 (–1.5–52.2)        | 40.9 (28–57.2)          | 9.59 (–0.55–22.8)        | 50.5 (32.6–73.8)         |
| Belgium                          | 347 (294–407)              | 101 (12.8–215)           | 448 (333–584)              | 29.2 (3.4–60.9)         | 69.3 (46.4–96.6)        | 20.3 (2.13–45.7)         | 89.7 (55.3–133)          |
| Cyprus                           | 32.2 (26.7–38.8)           | 6.66 (–1.66–15.8)        | 38.9 (28.7–50.8)           | 20.7 (–5.5–49.3)        | 6.5 (4.34–9.22)         | 1.34 (–0.308–3.5)        | 7.84 (4.78–11.7)         |
| Denmark                          | 169 (142–199)              | 28.6 (–12.9–76.2)        | 198 (149–258)              | 17.0 (–7.4–44.4)        | 33.8 (22.8–47.6)        | 5.72 (–2.46–15.9)        | 39.5 (24.5–58.2)         |
| Finland                          | 203 (174–236)              | 21.7 (–23.4–78.2)        | 225 (169–292)              | 10.6 (–12.0–36.5)       | 40.7 (27.7–57.8)        | 4.38 (–4.45–16.1)        | 45.1 (27.5–68.2)         |
| France                           | 2220 (1890–2590)           | 741 (103–1450)           | 2960 (2230–3890)           | 33.3 (4.7–64.9)         | 443 (303–622)           | 148 (18–323)             | 591 (367–893)            |
| Germany                          | 2480 (2110–2900)           | 414 (–170–1090)          | 2890 (2180–3790)           | 16.7 (–7.0–44.3)        | 491 (333–689)           | 81.1 (–36.2–225)         | 572 (374–834)            |
| Greece                           | 504 (421–599)              | 87.3 (–35–224)           | 591 (436–763)              | 17.3 (–7.8–43.6)        | 100 (68–142)            | 17.4 (–6.77–46.5)        | 118 (74.3–175)           |

|                                    |                            |                         |                            |                         |                         |                        |                         |
|------------------------------------|----------------------------|-------------------------|----------------------------|-------------------------|-------------------------|------------------------|-------------------------|
| Iceland                            | 7.62 (6.44–9.04)           | 1.43 (–0.443–3.61)      | 9.05 (6.84–11.7)           | 18.7 (–5.8–47.7)        | 1.54 (1.03–2.15)        | 0.286 (–0.0896–0.783)  | 1.82 (1.12–2.73)        |
| Ireland                            | 182 (159–210)              | 48.1 (1.92–101)         | 230 (176–297)              | 26.5 (1.0–55.0)         | 36.5 (25.3–50)          | 9.71 (0.38–21)         | 46.2 (28.3–68)          |
| Israel                             | 314 (263–374)              | 87.6 (5.96–181)         | 402 (301–521)              | 27.9 (1.9–55.8)         | 63.6 (42.6–89.8)        | 17.7 (1.13–39.6)       | 81.2 (51.4–122)         |
| Italy                              | 2020 (1740–2320)           | 462 (297–635)           | 2480 (2120–2900)           | 22.9 (14.8–30.6)        | 400 (275–558)           | 91.5 (51.4–137)        | 492 (333–686)           |
| Luxembourg                         | 16.4 (14.4–19)             | 4.67 (0.326–9.91)       | 21.1 (16.3–26.8)           | 28.5 (1.8–59.5)         | 3.29 (2.26–4.54)        | 0.933 (0.0614–2.03)    | 4.22 (2.71–6.26)        |
| Malta                              | 10.9 (9.09–13.1)           | 2.12 (–0.578–5.42)      | 13 (9.71–17.1)             | 19.4 (–5.2–49.9)        | 2.18 (1.47–3.13)        | 0.423 (–0.117–1.16)    | 2.61 (1.64–3.92)        |
| Monaco                             | 1.4 (1.12–1.72)            | 0.283 (–0.0601–0.69)    | 1.68 (1.24–2.23)           | 20.2 (–4.3–49.9)        | 0.279 (0.184–0.406)     | 0.0561 (–0.0114–0.138) | 0.335 (0.207–0.497)     |
| Netherlands                        | 515 (432–607)              | 141 (3–303)             | 656 (497–861)              | 27.4 (0.5–56.5)         | 103 (69.4–145)          | 28.3 (0.641–64)        | 132 (82.3–196)          |
| Norway                             | 169 (145–197)              | 28.6 (11.9–48.7)        | 197 (166–234)              | 16.9 (7.2–27.8)         | 34 (23.1–47.5)          | 5.74 (2.03–10.6)       | 39.8 (26.6–56.2)        |
| Portugal                           | 476 (401–559)              | 142 (14–282)            | 617 (474–791)              | 29.8 (3.0–58.1)         | 94.2 (63.7–132)         | 28 (2.95–58)           | 122 (76.8–181)          |
| San Marino                         | 1.24 (0.989–1.53)          | 0.405 (0.0567–0.81)     | 1.64 (1.15–2.18)           | 32.8 (4.6–63.8)         | 0.247 (0.164–0.358)     | 0.081 (0.0109–0.17)    | 0.328 (0.202–0.502)     |
| Spain                              | 1860 (1580–2140)           | 549 (56.9–1100)         | 2410 (1820–3020)           | 29.5 (3.1–60.1)         | 373 (254–513)           | 110 (9.84–233)         | 483 (302–707)           |
| Sweden                             | 380 (332–434)              | 93.2 (15.4–179)         | 473 (376–586)              | 24.5 (4.0–47.0)         | 76.1 (52.3–106)         | 18.6 (2.97–38.9)       | 94.8 (63–136)           |
| Switzerland                        | 280 (246–318)              | 48.6 (–17–125)          | 329 (252–415)              | 17.4 (–6.1–44.2)        | 55.8 (38.2–77.6)        | 9.7 (–3–26.5)          | 65.5 (41.6–95.7)        |
| UK                                 | 2440 (2110–2820)           | 677 (554–822)           | 3120 (2700–3610)           | 27.8 (24.0–31.7)        | 487 (332–681)           | 135 (91.1–194)         | 623 (427–864)           |
| <b>Latin America and Caribbean</b> | <b>15400 (13400–17800)</b> | <b>5360 (4320–6610)</b> | <b>20800 (18000–24000)</b> | <b>34.8 (29.5–40.7)</b> | <b>3090 (2120–4280)</b> | <b>1080 (706–1550)</b> | <b>4170 (2840–5750)</b> |
| <b>Andean Latin America</b>        | <b>1130 (950–1360)</b>     | <b>645 (371–985)</b>    | <b>1780 (1410–2220)</b>    | <b>56.9 (33.4–82.1)</b> | <b>230 (155–329)</b>    | <b>131 (68–219)</b>    | <b>361 (235–527)</b>    |
| Bolivia                            | 274 (227–331)              | 155 (49.9–276)          | 429 (307–578)              | 56.7 (19.4–99.0)        | 55.4 (36.7–78.9)        | 31.2 (10.3–59.8)       | 86.6 (54–131)           |
| Ecuador                            | 417 (344–500)              | 223 (80.6–395)          | 640 (468–851)              | 53.5 (20.2–96.1)        | 84.8 (56.5–121)         | 45.2 (15.9–86.1)       | 130 (79.8–193)          |
| Peru                               | 443 (370–537)              | 267 (85.4–520)          | 710 (500–997)              | 60.3 (19.2–111.2)       | 89.8 (60–128)           | 54.2 (16.3–108)        | 144 (83.4–224)          |
| <b>Caribbean</b>                   | <b>1350 (1150–1610)</b>    | <b>295 (140–474)</b>    | <b>1650 (1360–1990)</b>    | <b>21.8 (10.3–34.7)</b> | <b>272 (182–381)</b>    | <b>59.2 (23.7–106)</b> | <b>331 (220–471)</b>    |
| Antigua and Barbuda                | 2.06 (1.69–2.5)            | 0.407 (–0.0974–1.03)    | 2.46 (1.84–3.24)           | 19.8 (–4.4–48.8)        | 0.414 (0.273–0.592)     | 0.0819 (–0.0172–0.219) | 0.496 (0.311–0.754)     |
| Bahamas                            | 8.75 (7.15–10.7)           | 3.41 (0.889–6.62)       | 12.2 (8.92–16.4)           | 39.0 (10.5–72.2)        | 1.77 (1.17–2.53)        | 0.688 (0.166–1.39)     | 2.45 (1.54–3.73)        |
| Barbados                           | 7.94 (6.69–9.44)           | 1.3 (–0.511–3.68)       | 9.24 (6.84–12.1)           | 16.4 (–6.8–45.6)        | 1.59 (1.05–2.27)        | 0.26 (–0.105–0.767)    | 1.85 (1.14–2.79)        |
| Belize                             | 9.22 (7.55–11.1)           | 3.84 (0.98–7.35)        | 13.1 (9.54–17.7)           | 41.5 (10.7–78.2)        | 1.88 (1.26–2.72)        | 0.779 (0.185–1.58)     | 2.66 (1.64–4.12)        |
| Bermuda                            | 1.84 (1.54–2.19)           | 0.341 (–0.107–0.81)     | 2.18 (1.64–2.79)           | 18.6 (–5.4–43.5)        | 0.366 (0.244–0.518)     | 0.0677 (–0.0209–0.174) | 0.434 (0.281–0.64)      |
| Cuba                               | 415 (351–490)              | 60.2 (–33.4–172)        | 475 (368–618)              | 14.5 (–7.9–41.1)        | 82.5 (54.7–115)         | 11.9 (–6.28–34.8)      | 94.5 (59.7–137)         |
| Dominica                           | 1.62 (1.35–1.95)           | 0.296 (–0.118–0.769)    | 1.92 (1.44–2.56)           | 18.3 (–7.0–48.1)        | 0.325 (0.218–0.456)     | 0.0593 (–0.0224–0.163) | 0.384 (0.238–0.584)     |
| Dominican Republic                 | 311 (258–375)              | 104 (16–215)            | 415 (307–552)              | 33.5 (5.1–67.1)         | 62.9 (42.1–89.4)        | 21.1 (3.28–47.8)       | 84 (52.7–128)           |
| Grenada                            | 2.53 (2.12–3.06)           | 0.464 (–0.119–1.16)     | 3 (2.25–3.98)              | 18.3 (–4.7–45.7)        | 0.511 (0.336–0.73)      | 0.0938 (–0.0255–0.244) | 0.605 (0.373–0.889)     |

|                                     |                            |                          |                            |                         |                         |                        |                         |
|-------------------------------------|----------------------------|--------------------------|----------------------------|-------------------------|-------------------------|------------------------|-------------------------|
| Guyana                              | 30.2 (25.3–36)             | 9.34 (1.49–19.1)         | 39.6 (29.6–51.9)           | 30.9 (5.2–62.1)         | 6.08 (4.13–8.64)        | 1.88 (0.281–4.08)      | 7.96 (5.1–11.8)         |
| Haiti                               | 291 (238–360)              | 50.2 (–16.3–128)         | 342 (246–452)              | 17.3 (–6.1–42.9)        | 58.7 (38.7–84.8)        | 10.1 (–3.75–27.6)      | 68.9 (41.9–104)         |
| Jamaica                             | 62.9 (52.2–75.9)           | 13.2 (–2.84–32.4)        | 76.1 (55.4–98.1)           | 21.1 (–4.6–51.0)        | 12.7 (8.54–18)          | 2.68 (–0.563–6.82)     | 15.4 (9.48–22.6)        |
| Puerto Rico                         | 82.3 (69.5–97.9)           | 20.7 (–1.82–45.6)        | 103 (76.2–135)             | 25.2 (–2.5–54.0)        | 16.4 (10.9–23.2)        | 4.1 (–0.326–9.64)      | 20.5 (12.7–29.9)        |
| Saint Kitts and Nevis               | 2.04 (1.61–2.54)           | 0.359 (–0.128–0.94)      | 2.4 (1.73–3.2)             | 17.7 (–6.0–44.9)        | 0.41 (0.272–0.606)      | 0.0722 (–0.0233–0.197) | 0.482 (0.303–0.736)     |
| Saint Lucia                         | 4.75 (4–5.71)              | 0.893 (–0.207–2.32)      | 5.64 (4.32–7.45)           | 18.8 (–4.4–47.6)        | 0.952 (0.63–1.36)       | 0.179 (–0.0424–0.477)  | 1.13 (0.71–1.7)         |
| Saint Vincent and the Grenadines    | 2.99 (2.51–3.58)           | 0.547 (–0.206–1.38)      | 3.54 (2.64–4.61)           | 18.3 (–7.0–46.2)        | 0.601 (0.399–0.849)     | 0.11 (–0.0449–0.3)     | 0.712 (0.439–1.08)      |
| Suriname                            | 22.5 (19–26.7)             | 5.88 (0.381–12.4)        | 28.4 (21.3–36.8)           | 26.2 (1.8–54.8)         | 4.52 (3–6.48)           | 1.18 (0.0749–2.56)     | 5.69 (3.56–8.2)         |
| Trinidad and Tobago                 | 44.7 (37.5–52.6)           | 9.07 (–1.93–23.1)        | 53.7 (40.5–71.2)           | 20.3 (–4.3–52.2)        | 8.95 (6.05–12.7)        | 1.83 (–0.378–4.87)     | 10.8 (6.65–16.2)        |
| Virgin Islands                      | 2.92 (2.44–3.48)           | 0.362 (–0.318–1.15)      | 3.29 (2.45–4.34)           | 12.4 (–11.0–39.1)       | 0.58 (0.385–0.826)      | 0.0715 (–0.0659–0.243) | 0.651 (0.413–0.974)     |
| <b>Central Latin America</b>        | <b>6190 (5300–7220)</b>    | <b>2460 (1930–3150)</b>  | <b>8650 (7360–10200)</b>   | <b>39.8 (32.8–47.4)</b> | <b>1250 (843–1740)</b>  | <b>497 (326–723)</b>   | <b>1740 (1170–2460)</b> |
| Colombia                            | 720 (601–868)              | 258 (40.7–509)           | 977 (719–1320)             | 35.8 (5.6–69.2)         | 146 (97.2–212)          | 52.2 (7.82–110)        | 198 (122–296)           |
| Costa Rica                          | 128 (107–152)              | 44.9 (8.47–87.4)         | 172 (129–226)              | 35.2 (6.7–68.7)         | 25.7 (17.1–36.3)        | 9.08 (1.63–19.9)       | 34.8 (21.3–53.2)        |
| El Salvador                         | 167 (138–202)              | 44.3 (2.91–101)          | 211 (156–282)              | 26.5 (1.8–59.3)         | 33.7 (22.5–48.5)        | 8.91 (0.577–20.7)      | 42.6 (26.2–63.8)        |
| Guatemala                           | 405 (335–490)              | 169 (50.7–322)           | 573 (425–765)              | 41.7 (11.9–77.0)        | 81.4 (54.7–115)         | 33.9 (9.43–68.9)       | 115 (72.2–174)          |
| Honduras                            | 202 (166–247)              | 103 (30.6–190)           | 305 (222–417)              | 50.7 (16.0–89.3)        | 40.9 (27–57.8)          | 20.7 (5.94–40)         | 61.6 (37.8–92.9)        |
| Mexico                              | 3590 (3110–4140)           | 1510 (1180–1890)         | 5100 (4380–5940)           | 42.2 (34.8–50.6)        | 723 (491–999)           | 305 (193–444)          | 1030 (689–1430)         |
| Nicaragua                           | 155 (128–186)              | 45.6 (6.43–94.1)         | 201 (149–265)              | 29.4 (4.1–58.0)         | 31.5 (21.1–45.9)        | 9.29 (1.21–20.6)       | 40.8 (25–60.4)          |
| Panama                              | 92.8 (77–113)              | 52.2 (18.8–93.9)         | 145 (104–194)              | 56.3 (20.7–99.7)        | 18.8 (12.6–26.6)        | 10.6 (3.58–20.4)       | 29.3 (17.7–44.8)        |
| Venezuela                           | 734 (612–877)              | 233 (26.6–470)           | 967 (716–1280)             | 31.8 (3.7–64.9)         | 148 (98.5–210)          | 47 (5.07–105)          | 195 (120–297)           |
| <b>Tropical Latin America</b>       | <b>6720 (5970–7590)</b>    | <b>1960 (1320–2600)</b>  | <b>8680 (7500–9930)</b>    | <b>29.1 (20.5–38.2)</b> | <b>1340 (929–1850)</b>  | <b>390 (232–588)</b>   | <b>1730 (1190–2390)</b> |
| Brazil                              | 6560 (5820–7400)           | 1900 (1270–2530)         | 8460 (7330–9670)           | 29.0 (20.3–38.2)        | 1310 (907–1800)         | 379 (222–575)          | 1690 (1160–2320)        |
| Paraguay                            | 161 (134–194)              | 56.7 (11.4–112)          | 218 (161–290)              | 35.1 (7.2–68.1)         | 32.6 (21.9–46.2)        | 11.5 (2.17–24.8)       | 44.1 (27.3–67)          |
| <b>North Africa and Middle East</b> | <b>20700 (17200–25100)</b> | <b>7710 (5590–10300)</b> | <b>28400 (23300–34800)</b> | <b>37.2 (29.5–46.0)</b> | <b>4210 (2810–5970)</b> | <b>1560 (971–2340)</b> | <b>5770 (3860–8190)</b> |
| Afghanistan                         | 1230 (983–1530)            | 435 (90.7–837)           | 1660 (1170–2220)           | 35.4 (7.3–68.5)         | 249 (164–362)           | 88.6 (16.7–188)        | 338 (201–522)           |
| Algeria                             | 1360 (1110–1660)           | 347 (8.69–754)           | 1710 (1250–2270)           | 25.5 (0.6–54.1)         | 276 (182–396)           | 70.7 (1.51–168)        | 347 (213–526)           |
| Bahrain                             | 61.6 (50.4–75)             | 17.6 (2.25–37.4)         | 79.1 (57.9–105)            | 28.5 (3.7–57.9)         | 12.5 (8.36–17.9)        | 3.56 (0.414–8.05)      | 16.1 (9.96–24)          |
| Egypt                               | 2780 (2250–3420)           | 1190 (393–2250)          | 3970 (2910–5430)           | 42.8 (15.2–75.4)        | 567 (377–810)           | 242 (72.6–483)         | 809 (494–1230)          |
| Iran                                | 3430 (2820–4160)           | 1610 (1230–2080)         | 5050 (4130–6140)           | 47.0 (38.4–56.0)        | 692 (467–983)           | 325 (203–480)          | 1020 (674–1430)         |
| Iraq                                | 1240 (1010–1520)           | 518 (139–973)            | 1760 (1260–2350)           | 41.7 (10.9–76.4)        | 252 (167–362)           | 105 (27–208)           | 357 (218–532)           |

|                                               |                            |                            |                            |                         |                          |                           |                           |
|-----------------------------------------------|----------------------------|----------------------------|----------------------------|-------------------------|--------------------------|---------------------------|---------------------------|
| Jordan                                        | 346 (278–428)              | 89.1 (0.884–195)           | 435 (318–588)              | 25.8 (0.3–53.2)         | 70.7 (46.2–101)          | 18.2 (0.152–40.9)         | 88.9 (54.3–133)           |
| Kuwait                                        | 161 (128–199)              | 58.8 (13.4–113)            | 220 (161–289)              | 36.7 (8.1–67.9)         | 32.7 (21.5–47.3)         | 12 (2.61–24.6)            | 44.7 (27.4–68.2)          |
| Lebanon                                       | 218 (180–266)              | 60.8 (4.73–123)            | 278 (201–372)              | 27.9 (2.1–57.5)         | 43.7 (28.9–62.9)         | 12.3 (0.838–27.5)         | 56 (34.1–85.5)            |
| Libya                                         | 258 (207–317)              | 85.4 (13.2–173)            | 344 (251–457)              | 33.1 (4.9–64.8)         | 52.4 (34.9–74.8)         | 17.3 (2.52–38.4)          | 69.7 (42.7–106)           |
| Morocco                                       | 1550 (1290–1880)           | 591 (141–1160)             | 2140 (1580–2830)           | 38.1 (9.2–72.3)         | 314 (210–442)            | 120 (28.3–250)            | 434 (276–656)             |
| Oman                                          | 152 (123–190)              | 34.3 (–5.56–78.8)          | 186 (133–254)              | 22.5 (–3.5–52.2)        | 31.3 (20.5–45)           | 7.02 (–1.15–17)           | 38.3 (23.1–57)            |
| Palestine                                     | 236 (190–290)              | 95.1 (27.4–177)            | 331 (242–439)              | 40.3 (11.6–73.0)        | 48.2 (31.7–69)           | 19.4 (5.19–38.7)          | 67.6 (40.9–101)           |
| Qatar                                         | 108 (85.3–136)             | 39.7 (9.16–77.7)           | 147 (105–201)              | 37.0 (8.2–72.4)         | 22.2 (14.3–31.8)         | 8.16 (1.71–17.2)          | 30.3 (18.7–46.1)          |
| Saudi Arabia                                  | 1300 (1050–1590)           | 491 (107–935)              | 1790 (1250–2430)           | 37.8 (8.4–71.9)         | 264 (176–375)            | 99.9 (20.5–201)           | 364 (215–556)             |
| Sudan                                         | 1230 (990–1510)            | 413 (88.8–827)             | 1640 (1200–2270)           | 33.6 (7.2–64.7)         | 251 (164–362)            | 84.3 (17–187)             | 336 (205–510)             |
| Syria                                         | 462 (371–567)              | 106 (–11.7–249)            | 569 (418–745)              | 23.0 (–2.8–52.2)        | 93.3 (61.4–132)          | 21.5 (–2.11–53.5)         | 115 (69.2–176)            |
| Tunisia                                       | 542 (448–652)              | 173 (23.3–359)             | 715 (535–947)              | 31.9 (4.4–65.1)         | 109 (73.4–155)           | 34.8 (4.09–75.1)          | 144 (91.3–219)            |
| Turkey                                        | 2660 (2190–3210)           | 1060 (257–2040)            | 3720 (2680–4960)           | 39.8 (10.3–74.6)        | 539 (362–772)            | 214 (51.5–438)            | 753 (477–1120)            |
| United Arab Emirates                          | 318 (247–406)              | 81.6 (–1.44–186)           | 400 (290–546)              | 25.7 (–0.5–54.3)        | 65 (42.3–95.2)           | 16.7 (–0.289–38.8)        | 81.7 (49–127)             |
| Yemen                                         | 1070 (863–1340)            | 208 (–40.7–503)            | 1280 (947–1690)            | 19.4 (–3.8–47.1)        | 217 (144–315)            | 42.2 (–7.7–107)           | 259 (158–387)             |
| <b>South Asia</b>                             | <b>48500 (42200–56500)</b> | <b>17500 (13900–21600)</b> | <b>66100 (56900–77100)</b> | <b>36.1 (29.7–42.8)</b> | <b>9740 (6640–13600)</b> | <b>3510 (2320–5080)</b>   | <b>13300 (8990–18400)</b> |
| Bangladesh                                    | 5790 (4840–6940)           | 2240 (505–4440)            | 8030 (5920–10700)          | 38.7 (8.8–74.7)         | 1170 (783–1640)          | 452 (97.9–956)            | 1620 (1010–2500)          |
| Bhutan                                        | 22.2 (18.4–26.9)           | 3.19 (–2.36–9.88)          | 25.4 (18.6–33.8)           | 14.4 (–10.5–44.1)       | 4.47 (2.96–6.35)         | 0.643 (–0.454–2.06)       | 5.12 (3.21–7.66)          |
| India                                         | 36100 (31500–41800)        | 12600 (9970–15700)         | 48700 (42100–56900)        | 35.0 (28.5–41.9)        | 7220 (4950–9990)         | 2520 (1640–3650)          | 9740 (6650–13600)         |
| Nepal                                         | 1130 (963–1310)            | 404 (90.4–774)             | 1530 (1140–2010)           | 35.8 (7.9–66.8)         | 226 (152–318)            | 81.3 (14.9–165)           | 307 (186–456)             |
| Pakistan                                      | 5550 (4650–6610)           | 2280 (1270–3520)           | 7830 (6300–9800)           | 41.1 (23.1–62.8)        | 1120 (758–1580)          | 461 (224–790)             | 1580 (1030–2310)          |
| <b>Southeast Asia, east Asia, and Oceania</b> | <b>36800 (32100–42200)</b> | <b>4220 (2620–6060)</b>    | <b>41000 (35700–47300)</b> | <b>11.5 (7.2–16.0)</b>  | <b>7420 (5090–10400)</b> | <b>850 (458–1350)</b>     | <b>8270 (5630–11600)</b>  |
| <b>East Asia</b>                              | <b>27300 (23900–31400)</b> | <b>2390 (928–3960)</b>     | <b>29700 (25700–34300)</b> | <b>8.7 (3.5–14.1)</b>   | <b>5480 (3730–7710)</b>  | <b>478 (182–869)</b>      | <b>5960 (4090–8400)</b>   |
| China                                         | 26600 (23300–30500)        | 2350 (884–3860)            | 28900 (25000–33200)        | 8.9 (3.3–14.5)          | 5330 (3630–7490)         | 471 (179–856)             | 5800 (3980–8180)          |
| North Korea                                   | 399 (338–476)              | 20.4 (–69.2–137)           | 420 (307–562)              | 5.1 (–17.5–34.0)        | 80.7 (53.4–114)          | 4.03 (–14.6–28)           | 84.7 (53–126)             |
| Taiwan (province of China)                    | 356 (301–422)              | 16 (–68.9–114)             | 372 (270–495)              | 4.5 (–19.9–33.5)        | 71.3 (47.1–102)          | 3.3 (–13.7–23.6)          | 74.6 (45.2–113)           |
| <b>Oceania</b>                                | <b>209 (172–256)</b>       | <b>3.41 (–36.9–52.3)</b>   | <b>213 (163–281)</b>       | <b>1.7 (–17.6–24.0)</b> | <b>42.9 (28.6–62.4)</b>  | <b>0.715 (–7.62–11.3)</b> | <b>43.7 (27.6–65.1)</b>   |
| American Samoa                                | 0.705 (0.588–0.858)        | 0.0771 (–0.0831–0.279)     | 0.783 (0.58–1.04)          | 10.9 (–12.3–38.6)       | 0.143 (0.0959–0.204)     | 0.0156 (–0.0174–0.0582)   | 0.159 (0.0981–0.238)      |
| Cook Islands                                  | 0.355 (0.286–0.441)        | 0.0353 (–0.0483–0.139)     | 0.39 (0.279–0.536)         | 9.9 (–13.4–37.6)        | 0.0712 (0.0479–0.103)    | 0.00714 (–0.00901–0.0291) | 0.0784 (0.0478–0.121)     |
| Federated States of Micronesia                | 1.55 (1.28–1.89)           | 0.0454 (–0.325–0.499)      | 1.6 (1.16–2.14)            | 3.0 (–20.8–31.8)        | 0.318 (0.212–0.455)      | 0.00958 (–0.0705–0.107)   | 0.328 (0.196–0.513)       |
| Fiji                                          | 14.2 (11.8–17)             | 1.14 (–2.37–4.8)           | 15.3 (11.2–20.3)           | 8.1 (–16.1–32.9)        | 2.89 (1.95–4.12)         | 0.233 (–0.507–1.01)       | 3.12 (1.93–4.73)          |



|                          |                          |                            |                           |                         |                           |                              |                           |
|--------------------------|--------------------------|----------------------------|---------------------------|-------------------------|---------------------------|------------------------------|---------------------------|
| Guam                     | 3.15 (2.66–3.79)         | 0.799 (–0.00307–1.79)      | 3.95 (2.94–5.27)          | 25.3 (–0.1–55.5)        | 0.646 (0.434–0.922)       | 0.164 (–0.000748–0.389)      | 0.81 (0.493–1.22)         |
| Kiribati                 | 1.75 (1.43–2.16)         | 0.0887 (–0.328–0.552)      | 1.84 (1.36–2.48)          | 5.1 (–18.0–32.1)        | 0.358 (0.241–0.513)       | 0.0183 (–0.0662–0.116)       | 0.376 (0.229–0.578)       |
| Marshall Islands         | 0.824 (0.675–1)          | 0.0307 (–0.161–0.277)      | 0.855 (0.616–1.16)        | 3.7 (–19.0–31.3)        | 0.168 (0.113–0.243)       | 0.00634 (–0.0314–0.0581)     | 0.175 (0.107–0.272)       |
| Nauru                    | 0.179 (0.138–0.231)      | 0.0217 (–0.0226–0.0708)    | 0.2 (0.138–0.281)         | 12.1 (–12.7–38.6)       | 0.0366 (0.0235–0.0545)    | 0.00441 (–0.00497–0.0152)    | 0.041 (0.0241–0.0639)     |
| Niue                     | 0.0324 (0.026–0.0403)    | 0.00306 (–0.00476–0.0129)  | 0.0355 (0.0256–0.0478)    | 9.5 (–14.5–38.0)        | 0.00652 (0.00436–0.00961) | 0.00062 (–9e–04–0.00262)     | 0.00715 (0.00442–0.0112)  |
| Northern Mariana Islands | 0.7 (0.58–0.834)         | 0.138 (–0.0303–0.351)      | 0.838 (0.628–1.11)        | 19.8 (–4.1–48.6)        | 0.142 (0.0953–0.202)      | 0.0281 (–0.00557–0.0746)     | 0.17 (0.106–0.258)        |
| Palau                    | 0.369 (0.291–0.464)      | 0.0296 (–0.054–0.138)      | 0.398 (0.283–0.538)       | 8.1 (–15.1–36.4)        | 0.0743 (0.049–0.109)      | 0.00592 (–0.0109–0.0278)     | 0.0803 (0.0489–0.124)     |
| Papua New Guinea         | 157 (128–193)            | 0.32 (–38.5–44.5)          | 158 (114–216)             | 0.3 (–24.7–28.6)        | 32.3 (21.6–46.9)          | 0.0796 (–7.95–9.76)          | 32.4 (19.8–49.5)          |
| Samoa                    | 2.75 (2.29–3.38)         | 0.0548 (–0.611–0.803)      | 2.81 (2.05–3.82)          | 2.0 (–21.2–29.8)        | 0.563 (0.369–0.807)       | 0.0114 (–0.125–0.181)        | 0.574 (0.352–0.884)       |
| Solomon Islands          | 9.65 (7.82–11.9)         | 0.225 (–2.07–2.8)          | 9.87 (7.01–13.9)          | 2.3 (–20.9–30.0)        | 1.98 (1.32–2.89)          | 0.0464 (–0.431–0.663)        | 2.03 (1.25–3.16)          |
| Tokelau                  | 0.0247 (0.0198–0.031)    | 0.00259 (–0.00332–0.00948) | 0.0273 (0.0193–0.0371)    | 10.4 (–13.3–37.7)       | 0.00502 (0.00331–0.00735) | 0.000529 (–0.000683–0.00204) | 0.00555 (0.00331–0.00863) |
| Tonga                    | 1.26 (1.05–1.54)         | 0.141 (–0.17–0.503)        | 1.4 (1.01–1.87)           | 11.2 (–14.4–38.7)       | 0.257 (0.172–0.369)       | 0.0288 (–0.0351–0.106)       | 0.286 (0.174–0.435)       |
| Tuvalu                   | 0.216 (0.168–0.273)      | 0.0219 (–0.0272–0.0781)    | 0.238 (0.168–0.326)       | 10.1 (–13.4–35.0)       | 0.044 (0.0291–0.0655)     | 0.00445 (–0.00537–0.0164)    | 0.0485 (0.0295–0.0741)    |
| Vanuatu                  | 4.37 (3.61–5.36)         | 0.0749 (–0.97–1.32)        | 4.44 (3.16–6.26)          | 1.6 (–22.6–28.8)        | 0.897 (0.604–1.31)        | 0.0147 (–0.2–0.274)          | 0.912 (0.551–1.42)        |
| <b>Southeast Asia</b>    | <b>9250 (7880–10900)</b> | <b>1830 (1220–2570)</b>    | <b>11100 (9270–13300)</b> | <b>19.7 (13.5–26.1)</b> | <b>1890 (1280–2660)</b>   | <b>374 (212–583)</b>         | <b>2270 (1520–3200)</b>   |
| Cambodia                 | 265 (222–319)            | 30.2 (–34.1–110)           | 295 (218–396)             | 11.4 (–11.5–41.6)       | 54.4 (36–77.9)            | 6.24 (–6.63–23.8)            | 60.6 (37–93)              |
| Indonesia                | 3090 (2590–3640)         | 685 (423–1000)             | 3770 (3130–4540)          | 22.2 (14.0–31.0)        | 635 (433–899)             | 141 (75.6–224)               | 776 (527–1100)            |
| Laos                     | 99.7 (82.3–121)          | 15.3 (–9.2–45.4)           | 115 (83.9–154)            | 15.4 (–9.6–44.3)        | 20.6 (13.8–29.6)          | 3.17 (–1.91–9.95)            | 23.8 (14.5–34.9)          |
| Malaysia                 | 656 (547–793)            | 88.9 (–60.5–276)           | 745 (540–979)             | 13.5 (–8.8–42.6)        | 134 (90–191)              | 18.2 (–11.8–59.5)            | 152 (95.4–229)            |
| Maldives                 | 8.85 (7.31–10.7)         | 2.38 (0.227–5)             | 11.2 (8.35–15)            | 26.8 (2.6–55.0)         | 1.82 (1.22–2.55)          | 0.491 (0.0414–1.16)          | 2.32 (1.46–3.59)          |
| Mauritius                | 37.7 (31.6–45)           | 5.15 (–3.94–15.5)          | 42.8 (31.9–55.9)          | 13.7 (–10.6–41.6)       | 7.58 (5.02–10.8)          | 1.04 (–0.775–3.26)           | 8.62 (5.45–13)            |
| Myanmar                  | 505 (410–620)            | 141 (6.61–302)             | 647 (472–866)             | 27.9 (1.4–56.8)         | 103 (68.7–148)            | 28.8 (1.24–66.8)             | 132 (80.7–198)            |
| Philippines              | 1740 (1460–2050)         | 610 (473–769)              | 2350 (1960–2790)          | 35.1 (29.5–41.0)        | 356 (243–503)             | 125 (82.3–180)               | 481 (328–679)             |
| Seychelles               | 1.52 (1.27–1.82)         | 0.268 (–0.103–0.742)       | 1.78 (1.31–2.4)           | 17.6 (–7.0–47.2)        | 0.309 (0.206–0.44)        | 0.0547 (–0.0209–0.16)        | 0.364 (0.225–0.561)       |
| Sri Lanka                | 359 (306–422)            | 71.2 (–13.8–176)           | 430 (329–553)             | 19.9 (–4.1–47.2)        | 73.1 (49.2–103)           | 14.6 (–2.26–38.5)            | 87.7 (55.2–132)           |
| Thailand                 | 1330 (1120–1590)         | 94 (–209–486)              | 1420 (1040–1920)          | 7.1 (–16.4–36.5)        | 267 (181–382)             | 18.9 (–45.3–102)             | 286 (176–442)             |
| Timor–Leste              | 17.5 (14.3–21.5)         | 2.67 (–1.47–7.9)           | 20.1 (14.6–27.5)          | 15.3 (–8.9–45.2)        | 3.59 (2.4–5.15)           | 0.549 (–0.309–1.77)          | 4.14 (2.62–6.32)          |
| Vietnam                  | 1140 (946–1370)          | 78.6 (–199–412)            | 1220 (872–1630)           | 6.9 (–17.8–35.3)        | 233 (154–332)             | 16.1 (–42.9–90.8)            | 249 (149–377)             |

|                                    |                            |                         |                            |                         |                         |                        |                         |
|------------------------------------|----------------------------|-------------------------|----------------------------|-------------------------|-------------------------|------------------------|-------------------------|
| <b>Sub-Saharan Africa</b>          | <b>26800 (22600–32100)</b> | <b>6160 (4660–7960)</b> | <b>32900 (27700–39500)</b> | <b>23.0 (18.3–27.9)</b> | <b>5430 (3680–7660)</b> | <b>1250 (785–1860)</b> | <b>6680 (4500–9440)</b> |
| <b>Central sub-Saharan Africa</b>  | <b>4620 (3780–5630)</b>    | <b>1020 (226–1980)</b>  | <b>5640 (4390–7250)</b>    | <b>22.0 (4.9–41.9)</b>  | <b>939 (626–1350)</b>   | <b>207 (41.9–432)</b>  | <b>1150 (727–1660)</b>  |
| Angola                             | 1080 (876–1320)            | 233 (–28.2–528)         | 1310 (973–1710)            | 21.7 (–2.7–47.8)        | 220 (146–320)           | 47.3 (–5.84–112)       | 267 (163–397)           |
| Central African Republic           | 211 (173–259)              | 37.4 (–14–100)          | 249 (179–335)              | 17.7 (–6.1–46.0)        | 42.7 (28.5–61.6)        | 7.57 (–2.68–21.2)      | 50.3 (30.3–79.1)        |
| Congo                              | 208 (170–250)              | 48 (–1.45–113)          | 256 (190–344)              | 23.1 (–0.6–54.3)        | 42.2 (27.9–60.7)        | 9.74 (–0.257–25.2)     | 51.9 (31.8–78.9)        |
| Democratic Republic of the Congo   | 3000 (2440–3650)           | 673 (–56.8–1550)        | 3670 (2680–4920)           | 22.4 (–2.2–50.9)        | 608 (405–877)           | 137 (–7.47–339)        | 745 (454–1120)          |
| Equatorial Guinea                  | 57 (46–70.3)               | 12.6 (–0.53–30.4)       | 69.6 (51.2–92.6)           | 22.1 (–1.0–51.1)        | 11.6 (7.72–16.7)        | 2.58 (–0.0862–6.45)    | 14.2 (8.73–21.6)        |
| Gabon                              | 72 (59.2–86.9)             | 13.1 (–3.74–33.7)       | 85.1 (64.1–113)            | 18.1 (–5.5–45.7)        | 14.6 (9.69–20.7)        | 2.65 (–0.771–7.21)     | 17.2 (10.7–25.7)        |
| <b>Eastern sub-Saharan Africa</b>  | <b>10600 (8920–12700)</b>  | <b>2180 (1410–3060)</b> | <b>12800 (10600–15400)</b> | <b>20.5 (13.5–27.4)</b> | <b>2160 (1460–3030)</b> | <b>442 (252–702)</b>   | <b>2600 (1750–3660)</b> |
| Burundi                            | 288 (235–351)              | 28.4 (–36.7–112)        | 317 (235–432)              | 9.8 (–12.5–36.7)        | 58.5 (38.5–83.3)        | 5.74 (–7.53–24.1)      | 64.2 (39.5–98)          |
| Comoros                            | 19 (15.7–23)               | 4.19 (–0.358–9.8)       | 23.2 (17.6–31)             | 22.0 (–1.8–49.4)        | 3.87 (2.56–5.56)        | 0.848 (–0.0814–2.04)   | 4.71 (3.03–7.05)        |
| Djibouti                           | 33 (26.8–40.4)             | 5.95 (–1.57–15.5)       | 39 (28.4–51.9)             | 18.0 (–4.5–45.6)        | 6.75 (4.4–9.8)          | 1.22 (–0.302–3.23)     | 7.96 (4.95–12.1)        |
| Eritrea                            | 178 (145–218)              | 17.7 (–21.8–62.6)       | 196 (147–259)              | 10.1 (–11.8–34.8)       | 36.2 (23.7–51.9)        | 3.61 (–4.41–13.5)      | 39.8 (24.7–59.5)        |
| Ethiopia                           | 2600 (2190–3090)           | 534 (200–899)           | 3130 (2570–3820)           | 20.6 (7.7–33.9)         | 530 (361–753)           | 109 (39.1–201)         | 639 (424–908)           |
| Kenya                              | 1310 (1130–1520)           | 444 (351–553)           | 1750 (1500–2050)           | 34.0 (28.7–39.6)        | 266 (181–368)           | 90.3 (59.8–132)        | 356 (247–500)           |
| Madagascar                         | 710 (582–866)              | 136 (–48–337)           | 846 (615–1150)             | 19.2 (–6.7–46.2)        | 145 (96.9–208)          | 27.8 (–9.5–74.7)       | 173 (103–261)           |
| Malawi                             | 378 (310–461)              | 75.2 (–22.9–192)        | 453 (332–604)              | 19.9 (–6.0–49.9)        | 77.1 (51–110)           | 15.4 (–4.06–40.3)      | 92.5 (55.7–139)         |
| Mozambique                         | 737 (608–892)              | 131 (–46.5–369)         | 868 (641–1150)             | 17.7 (–6.3–48.2)        | 148 (98–211)            | 26.1 (–8.79–73.9)      | 174 (106–255)           |
| Rwanda                             | 374 (307–457)              | 62 (–24–168)            | 436 (317–580)              | 16.6 (–5.9–44.4)        | 75.8 (50.2–108)         | 12.5 (–4.79–36.1)      | 88.3 (55.3–133)         |
| Somalia                            | 482 (392–601)              | 85.5 (–28.2–225)        | 568 (423–757)              | 17.8 (–6.0–44.9)        | 98.2 (64.7–141)         | 17.3 (–5.35–46.5)      | 116 (70.7–174)          |
| South Sudan                        | 232 (192–284)              | 33.8 (–19.7–100)        | 265 (194–353)              | 14.6 (–8.5–41.2)        | 46.8 (31.2–66)          | 6.79 (–3.72–20.3)      | 53.5 (33.8–78.3)        |
| Uganda                             | 1490 (1210–1840)           | 317 (–29.6–779)         | 1810 (1330–2410)           | 21.3 (–2.2–49.2)        | 305 (202–433)           | 64.5 (–6.54–166)       | 369 (232–566)           |
| Tanzania                           | 1390 (1140–1690)           | 249 (–67.4–636)         | 1630 (1220–2160)           | 18.0 (–4.9–45.5)        | 282 (185–399)           | 50.6 (–13.3–133)       | 332 (205–497)           |
| Zambia                             | 385 (315–469)              | 48.2 (–42.4–160)        | 434 (320–576)              | 12.5 (–11.2–40.8)       | 78.3 (51.5–113)         | 9.81 (–8.49–34.3)      | 88.1 (54.2–133)         |
| <b>Southern sub-Saharan Africa</b> | <b>2210 (1910–2590)</b>    | <b>840 (585–1130)</b>   | <b>3050 (2560–3630)</b>    | <b>38.0 (27.1–48.6)</b> | <b>442 (305–610)</b>    | <b>168 (101–260)</b>   | <b>609 (412–862)</b>    |
| Botswana                           | 67.7 (55.8–82.8)           | 8.64 (–6.45–27.3)       | 76.4 (56.2–102)            | 12.7 (–9.7–40.4)        | 13.6 (9.07–19.5)        | 1.74 (–1.26–5.7)       | 15.3 (9.54–23.3)        |
| Eswatini                           | 32.1 (26.3–38.9)           | 11.6 (2.78–23.3)        | 43.7 (32–59.1)             | 36.2 (8.5–68.6)         | 6.43 (4.33–9.23)        | 2.33 (0.481–5)         | 8.76 (5.41–13.5)        |
| Lesotho                            | 74.3 (61.2–90.3)           | 18.3 (–1.14–39.4)       | 92.6 (68.6–122)            | 24.6 (–1.5–54.0)        | 14.8 (9.99–21)          | 3.63 (–0.206–8.44)     | 18.4 (11.7–27.6)        |
| Namibia                            | 51.5 (42.6–61.9)           | 15.1 (0.874–31.6)       | 66.6 (48.7–88.8)           | 29.2 (1.7–59.9)         | 10.4 (7.05–14.9)        | 3.05 (0.2–6.6)         | 13.5 (8.35–20.2)        |
| South Africa                       | 1740 (1520–2020)           | 743 (499–1010)          | 2490 (2080–2940)           | 42.7 (30.0–55.6)        | 347 (240–482)           | 148 (86.3–231)         | 496 (336–701)           |

|                                   |                          |                         |                           |                         |                         |                       |                         |
|-----------------------------------|--------------------------|-------------------------|---------------------------|-------------------------|-------------------------|-----------------------|-------------------------|
| Zimbabwe                          | 240 (196–294)            | 47 (–10.3–122)          | 287 (210–376)             | 19.6 (–4.9–47.4)        | 48.4 (32.4–70.4)        | 9.47 (–2.19–24.6)     | 57.9 (35.6–87.9)        |
| <b>Western sub-Saharan Africa</b> | <b>9320 (7830–11200)</b> | <b>2130 (1590–2800)</b> | <b>11400 (9620–13700)</b> | <b>22.8 (17.8–27.9)</b> | <b>1890 (1280–2660)</b> | <b>430 (269–635)</b>  | <b>2320 (1570–3310)</b> |
| Benin                             | 286 (235–348)            | 29.3 (–37.9–109)        | 315 (230–424)             | 10.3 (–13.2–36.8)       | 58.1 (38.1–82.3)        | 5.92 (–8.04–23.3)     | 64 (39.4–95.9)          |
| Burkina Faso                      | 504 (415–612)            | 58.8 (–55.7–192)        | 563 (418–759)             | 11.7 (–11.5–37.9)       | 103 (68.2–147)          | 12 (–11.4–41)         | 115 (72.2–174)          |
| Cabo Verde                        | 20.4 (17–24.5)           | 9.46 (2.57–17)          | 29.8 (21.9–38.9)          | 46.5 (12.1–82.5)        | 4.13 (2.78–5.77)        | 1.91 (0.516–3.55)     | 6.05 (3.73–9.07)        |
| Cameroon                          | 749 (612–916)            | 88.9 (–85.6–305)        | 837 (603–1120)            | 11.9 (–11.1–38.6)       | 152 (101–217)           | 18.1 (–17.5–59.5)     | 170 (103–251)           |
| Chad                              | 419 (340–516)            | 60.5 (–34.1–178)        | 480 (354–645)             | 14.5 (–8.7–41.4)        | 85.2 (56.6–121)         | 12.3 (–7.67–37.9)     | 97.5 (60.1–146)         |
| Côte d'Ivoire                     | 524 (427–637)            | 64.6 (–59.5–214)        | 589 (434–806)             | 12.3 (–11.6–40.7)       | 107 (70.6–153)          | 13.2 (–12.5–46.1)     | 120 (73.9–184)          |
| The Gambia                        | 74.4 (60.6–91)           | 14.4 (–3.59–36.4)       | 88.8 (64.9–120)           | 19.4 (–4.8–46.4)        | 15 (9.93–21.4)          | 2.92 (–0.671–7.54)    | 17.9 (11.2–27.2)        |
| Ghana                             | 829 (682–1010)           | 143 (–48.9–381)         | 972 (728–1290)            | 17.2 (–6.0–45.1)        | 169 (111–244)           | 28.9 (–9.34–81.3)     | 197 (122–297)           |
| Guinea                            | 285 (235–348)            | 48.6 (–21.6–133)        | 334 (248–438)             | 17.1 (–7.3–47.3)        | 57.9 (38.9–82.4)        | 9.66 (–4.95–27.1)     | 67.5 (43.4–101)         |
| Guinea-Bissau                     | 45.8 (37.4–56.4)         | 7.97 (–3.05–22)         | 53.8 (39.8–72.1)          | 17.4 (–7.1–47.3)        | 9.3 (6.16–13.3)         | 1.62 (–0.665–4.66)    | 10.9 (6.9–16.4)         |
| Liberia                           | 128 (104–157)            | 21.8 (–8.03–63.1)       | 150 (111–202)             | 17.1 (–6.4–46.6)        | 25.4 (16.8–35.9)        | 4.36 (–1.55–12.9)     | 29.8 (18.2–45.4)        |
| Mali                              | 351 (286–432)            | 71.7 (–15.8–173)        | 423 (305–565)             | 20.3 (–4.8–48.9)        | 71.5 (47.4–102)         | 14.6 (–3.18–38.8)     | 86.1 (52.8–130)         |
| Mauritania                        | 77.2 (63.7–94.2)         | 17.8 (–1.47–39.5)       | 95 (71.1–126)             | 23.1 (–1.8–51.6)        | 15.8 (10.4–22.6)        | 3.65 (–0.263–8.6)     | 19.4 (11.9–29.4)        |
| Niger                             | 435 (357–537)            | 49.6 (–55.1–173)        | 485 (356–645)             | 11.4 (–13.0–37.9)       | 88.9 (58.8–128)         | 10 (–11.4–36.8)       | 98.9 (60.8–149)         |
| Nigeria                           | 3850 (3260–4540)         | 1280 (1010–1620)        | 5140 (4330–6120)          | 33.3 (27.8–39.0)        | 781 (535–1100)          | 260 (170–375)         | 1040 (705–1440)         |
| São Tomé and Príncipe             | 4.35 (3.55–5.37)         | 0.901 (–0.195–2.23)     | 5.25 (3.8–7.05)           | 20.7 (–4.5–48.8)        | 0.889 (0.585–1.29)      | 0.184 (–0.0374–0.481) | 1.07 (0.664–1.65)       |
| Senegal                           | 325 (270–397)            | 94.6 (7.72–204)         | 420 (313–561)             | 29.1 (2.6–59.8)         | 65.9 (43.8–94)          | 19.1 (1.53–41.1)      | 85 (52.6–126)           |
| Sierra Leone                      | 203 (167–250)            | 32 (–17.7–87.3)         | 235 (173–310)             | 15.8 (–9.3–43.4)        | 41.2 (27.3–59.3)        | 6.46 (–3.74–19.5)     | 47.7 (29.9–71.2)        |
| Togo                              | 202 (166–245)            | 27.3 (–18.6–83.6)       | 229 (171–306)             | 13.6 (–9.0–41.7)        | 41.1 (27.1–58.5)        | 5.52 (–3.86–17.3)     | 46.6 (29.5–69.9)        |

**Table S8: Prevalence and DALYs of Anxiety disorders per 100 000 persons, with 95% uncertainty intervals, by location, for the year 2020**

| Location                                                | Baseline prevalence           | Additional prevalence        | Final prevalence              | % change                | Baseline DALYs             | Additional DALYs          | Final DALYs                |
|---------------------------------------------------------|-------------------------------|------------------------------|-------------------------------|-------------------------|----------------------------|---------------------------|----------------------------|
| <b>Global</b>                                           | <b>3824.9 (3283.3–4468.1)</b> | <b>977.5 (824.8–1161.6)</b>  | <b>4802.4 (4108.2–5588.6)</b> | <b>25.6 (23.2–28.0)</b> | <b>454.8 (307.0–642.5)</b> | <b>116.1 (79.3–163.8)</b> | <b>570.9 (387.3–802.2)</b> |
| <b>Central Europe, eastern Europe, and central Asia</b> | <b>3274.3 (2801.2–3821.9)</b> | <b>981.0 (774.1–1214.4)</b>  | <b>4255.3 (3593.1–4970.8)</b> | <b>30.0 (24.9–35.0)</b> | <b>385.5 (259.6–543.8)</b> | <b>115.4 (76.5–166.5)</b> | <b>500.9 (338.5–703.0)</b> |
| <b>Central Asia</b>                                     | <b>2087.1 (1688.0–2594.0)</b> | <b>696.3 (392.6–1037.9)</b>  | <b>2783.4 (2158.9–3493.7)</b> | <b>33.4 (19.1–47.9)</b> | <b>250.9 (161.6–363.3)</b> | <b>83.5 (39.8–137.8)</b>  | <b>334.4 (215.4–486.0)</b> |
| Armenia                                                 | 2744.5 (2222.5–3389.6)        | 1046.9 (217.4–2091.9)        | 3791.5 (2736.8–5119.3)        | 38.2 (7.7–74.3)         | 326.7 (216.4–474.2)        | 124.4 (24.6–263.3)        | 451.1 (270.7–674.7)        |
| Azerbaijan                                              | 2363.5 (1898.2–2923.0)        | 757.0 (25.4–1665.9)          | 3120.5 (2139.7–4248.1)        | 32.0 (1.1–69.0)         | 284.0 (186.9–411.6)        | 91.0 (2.9–214.9)          | 375.0 (223.6–583.1)        |
| Georgia                                                 | 2414.6 (1958.3–2945.8)        | 750.4 (56.0–1624.5)          | 3165.1 (2259.7–4297.0)        | 31.2 (2.4–65.8)         | 285.5 (188.2–413.6)        | 88.6 (7.5–204.7)          | 374.1 (225.8–562.9)        |
| Kazakhstan                                              | 2059.4 (1665.9–2541.7)        | 698.0 (92.0–1467.0)          | 2757.4 (1978.3–3745.6)        | 34.0 (4.1–69.3)         | 246.1 (160.1–356.0)        | 83.3 (10.2–182.8)         | 329.4 (202.0–512.2)        |
| Kyrgyzstan                                              | 1965.6 (1576.8–2433.6)        | 948.1 (260.4–1804.4)         | 2913.7 (2083.1–4076.7)        | 48.2 (14.3–90.0)        | 237.2 (151.2–346.4)        | 113.7 (29.1–224.7)        | 350.9 (210.2–534.8)        |
| Mongolia                                                | 2020.6 (1610.0–2535.2)        | 35.9 (–444.6–585.7)          | 2056.5 (1446.5–2840.1)        | 1.8 (–22.3–28.8)        | 242.5 (156.1–343.6)        | 4.2 (–55.7–75.1)          | 246.8 (144.4–370.0)        |
| Tajikistan                                              | 2114.8 (1689.6–2692.9)        | 698.7 (82.3–1463.5)          | 2813.5 (2008.2–3887.9)        | 33.0 (3.7–67.6)         | 256.0 (164.5–371.6)        | 84.5 (8.3–187.7)          | 340.5 (203.1–532.8)        |
| Turkmenistan                                            | 2151.7 (1714.8–2672.0)        | 751.3 (75.5–1562.6)          | 2903.0 (2097.0–3987.6)        | 35.0 (3.4–70.8)         | 259.3 (169.9–376.9)        | 90.7 (8.2–201.9)          | 350.0 (212.5–546.8)        |
| Uzbekistan                                              | 1948.8 (1549.1–2445.3)        | 652.3 (74.2–1375.0)          | 2601.1 (1809.5–3605.9)        | 33.5 (3.8–67.7)         | 235.1 (149.8–346.8)        | 78.4 (8.1–173.2)          | 313.5 (188.9–479.3)        |
| <b>Central Europe</b>                                   | <b>3681.1 (3084.0–4381.6)</b> | <b>989.9 (670.0–1379.8)</b>  | <b>4671.0 (3863.3–5668.9)</b> | <b>26.9 (18.9–34.9)</b> | <b>432.0 (288.8–621.3)</b> | <b>116.1 (66.9–179.8)</b> | <b>548.1 (368.2–780.6)</b> |
| Albania                                                 | 3933.8 (3176.0–4803.1)        | 1431.1 (250.0–2891.0)        | 5364.9 (3895.4–7147.6)        | 36.5 (6.1–71.5)         | 466.4 (308.9–674.1)        | 169.9 (26.3–361.7)        | 636.3 (392.7–979.5)        |
| Bosnia and Herzegovina                                  | 3874.0 (3148.3–4797.4)        | 1119.7 (67.5–2543.9)         | 4993.7 (3575.3–6794.2)        | 28.9 (1.8–63.6)         | 453.6 (303.0–654.5)        | 131.1 (7.8–311.0)         | 584.7 (365.8–888.7)        |
| Bulgaria                                                | 3911.0 (3169.7–4799.9)        | 1004.8 (–43.4–2293.2)        | 4915.8 (3569.2–6630.4)        | 25.7 (–1.2–57.6)        | 457.6 (304.6–663.7)        | 117.3 (–4.9–292.2)        | 575.0 (358.3–884.3)        |
| Croatia                                                 | 3929.4 (3191.0–4812.0)        | 862.4 (–209.0–2114.3)        | 4791.8 (3408.4–6564.0)        | 22.0 (–5.5–52.1)        | 460.0 (306.8–667.2)        | 100.6 (–24.7–258.3)       | 560.5 (345.0–854.8)        |
| Czechia                                                 | 3592.3 (2922.5–4404.2)        | 952.2 (–29.3–2270.0)         | 4544.5 (3304.3–6271.2)        | 26.5 (–0.8–61.6)        | 419.4 (274.3–600.9)        | 111.2 (–4.1–264.8)        | 530.6 (319.1–800.5)        |
| Hungary                                                 | 3815.7 (3098.3–4647.4)        | 623.9 (–351.5–1791.8)        | 4439.6 (3196.8–6068.3)        | 16.3 (–9.2–46.8)        | 445.4 (298.8–649.5)        | 73.1 (–39.8–223.4)        | 518.4 (315.2–810.0)        |
| Montenegro                                              | 3839.6 (3111.9–4699.3)        | 1272.2 (118.0–2669.5)        | 5111.8 (3585.5–6821.1)        | 33.2 (3.2–69.0)         | 453.4 (298.9–651.9)        | 150.5 (13.3–347.6)        | 603.9 (358.7–913.9)        |
| North Macedonia                                         | 3847.0 (3142.7–4708.6)        | 1406.8 (259.4–2913.2)        | 5253.8 (3758.5–7128.9)        | 36.6 (7.1–73.8)         | 454.3 (297.6–657.5)        | 166.4 (30.2–362.0)        | 620.7 (381.7–959.7)        |
| Poland                                                  | 3589.0 (3109.0–4127.9)        | 906.1 (608.8–1226.8)         | 4495.1 (3860.6–5206.8)        | 25.3 (17.5–33.8)        | 421.4 (286.6–591.5)        | 106.3 (63.0–165.5)        | 527.7 (361.1–729.0)        |
| Romania                                                 | 3581.9 (2902.6–4413.3)        | 1239.1 (95.6–2629.1)         | 4820.9 (3421.3–6580.1)        | 34.6 (3.2–69.1)         | 421.3 (278.4–612.3)        | 145.5 (9.7–332.1)         | 566.9 (339.8–868.3)        |
| Serbia                                                  | 3697.4 (3001.6–4508.8)        | 1031.0 (22.2–2474.8)         | 4728.4 (3462.3–6402.7)        | 27.9 (0.6–64.7)         | 435.1 (285.8–631.6)        | 121.3 (2.5–297.2)         | 556.4 (341.8–840.3)        |
| Slovakia                                                | 3758.2 (3055.6–4589.0)        | 949.8 (–40.5–2026.5)         | 4708.1 (3507.6–6309.1)        | 25.3 (–1.1–54.1)        | 442.4 (291.6–639.5)        | 112.3 (–4.3–259.6)        | 554.6 (344.2–854.1)        |
| Slovenia                                                | 3741.6 (3057.6–4562.5)        | 990.4 (–58.2–2345.3)         | 4732.0 (3373.6–6480.1)        | 26.4 (–1.6–61.4)        | 437.3 (292.1–630.4)        | 115.7 (–6.4–292.9)        | 553.0 (334.1–860.7)        |
| <b>Eastern Europe</b>                                   | <b>3603.2 (3128.7–4130.9)</b> | <b>1108.2 (835.7–1427.2)</b> | <b>4711.4 (4038.1–5478.9)</b> | <b>30.8 (23.9–38.5)</b> | <b>422.5 (286.5–589.9)</b> | <b>129.8 (83.3–190.4)</b> | <b>552.3 (374.5–773.5)</b> |
| Belarus                                                 | 3814.5 (3096.6–4700.2)        | 979.8 (–116.1–2379.6)        | 4794.3 (3425.5–6610.1)        | 25.6 (–3.1–60.0)        | 449.0 (296.0–645.6)        | 114.7 (–12.3–282.4)       | 563.6 (347.2–859.5)        |
| Estonia                                                 | 3766.9 (3063.4–4568.0)        | 659.1 (–366.3–1784.7)        | 4426.0 (3167.4–5947.5)        | 17.6 (–9.8–49.6)        | 441.7 (294.9–640.4)        | 77.5 (–47.3–228.1)        | 519.2 (317.1–795.4)        |
| Latvia                                                  | 4009.8 (3265.3–4839.9)        | 830.2 (–181.4–2162.2)        | 4840.0 (3492.7–6551.8)        | 20.7 (–4.7–54.5)        | 469.4 (311.7–671.0)        | 97.5 (–20.0–272.1)        | 566.9 (346.3–870.1)        |

|                                  |                               |                               |                               |                         |                             |                            |                             |
|----------------------------------|-------------------------------|-------------------------------|-------------------------------|-------------------------|-----------------------------|----------------------------|-----------------------------|
| Lithuania                        | 4659.4 (3772.5–5649.5)        | 1348.8 (65.5–2844.7)          | 6008.2 (4326.8–8128.7)        | 29.0 (1.4–62.0)         | 545.3 (361.8–785.5)         | 157.7 (7.0–369.3)          | 703.1 (433.3–1055.8)        |
| Republic of Moldova              | 4227.1 (3423.8–5211.2)        | 1592.6 (283.0–2998.4)         | 5819.7 (4088.9–7716.8)        | 37.8 (7.0–71.3)         | 499.2 (331.0–720.9)         | 188.6 (29.9–396.7)         | 687.8 (404.6–1059.2)        |
| Russia                           | 3597.1 (3129.3–4121.4)        | 1149.6 (945.6–1412.0)         | 4746.8 (4130.2–5460.8)        | 32.0 (26.9–37.3)        | 421.8 (285.7–594.0)         | 134.6 (90.0–193.0)         | 556.4 (379.8–776.4)         |
| Ukraine                          | 3438.1 (2990.0–3963.1)        | 968.0 (27.1–2102.5)           | 4406.2 (3324.5–5765.8)        | 28.2 (0.8–60.9)         | 402.6 (275.6–562.6)         | 113.3 (3.1–257.8)          | 515.9 (332.1–772.4)         |
| <b>High-income</b>               | <b>5356.8 (4609.1–6233.3)</b> | <b>1349.0 (1044.1–1678.8)</b> | <b>6705.7 (5773.4–7829.4)</b> | <b>25.2 (20.3–30.7)</b> | <b>627.7 (428.1–877.7)</b>  | <b>158.0 (103.6–234.7)</b> | <b>785.7 (536.8–1101.1)</b> |
| <b>Australasia</b>               | <b>6225.5 (5158.6–7610.0)</b> | <b>680.9 (–531.5–2118.3)</b>  | <b>6906.4 (5209.8–9073.8)</b> | <b>10.9 (–8.7–34.8)</b> | <b>735.0 (488.5–1053.6)</b> | <b>80.9 (–61.7–278.2)</b>  | <b>815.9 (516.0–1222.3)</b> |
| Australia                        | 5975.6 (4887.8–7410.4)        | 696.1 (–713.8–2400.9)         | 6671.7 (4845.9–9038.0)        | 11.6 (–12.3–40.8)       | 705.6 (465.9–1018.4)        | 82.9 (–79.8–312.3)         | 788.5 (489.2–1221.6)        |
| New Zealand                      | 7485.8 (6443.1–8730.3)        | 585.8 (–777.2–2218.1)         | 8071.6 (6331.5–10221.4)       | 7.9 (–10.7–30.4)        | 883.4 (592.4–1222.2)        | 68.7 (–91.8–273.3)         | 952.1 (630.3–1388.4)        |
| <b>High income Asia Pacific</b>  | <b>2765.9 (2370.2–3231.2)</b> | <b>341.6 (68.3–672.6)</b>     | <b>3107.5 (2582.1–3708.1)</b> | <b>12.4 (2.4–23.9)</b>  | <b>329.2 (222.5–467.1)</b>  | <b>40.7 (8.1–86.5)</b>     | <b>369.9 (244.0–529.3)</b>  |
| Brunei                           | 3081.8 (2465.7–3823.4)        | 310.7 (–459.1–1241.0)         | 3392.5 (2404.5–4775.8)        | 10.1 (–15.4–40.3)       | 373.5 (240.1–544.0)         | 37.4 (–58.6–159.1)         | 410.9 (241.5–631.9)         |
| Japan                            | 2455.2 (2151.2–2780.3)        | 311.1 (182.9–460.7)           | 2766.3 (2387.1–3185.1)        | 12.7 (7.6–18.5)         | 291.0 (198.3–406.5)         | 36.9 (17.8–62.3)           | 328.0 (220.0–463.3)         |
| Singapore                        | 2984.8 (2399.0–3701.7)        | 539.8 (–237.9–1495.8)         | 3524.6 (2550.8–4780.6)        | 18.2 (–8.2–50.8)        | 359.7 (236.9–517.9)         | 65.2 (–30.8–194.5)         | 424.9 (256.3–655.6)         |
| South Korea                      | 3480.3 (2818.2–4295.8)        | 393.6 (–515.6–1456.8)         | 3873.9 (2745.3–5250.6)        | 11.3 (–14.3–41.0)       | 416.6 (274.2–605.7)         | 47.2 (–61.8–178.7)         | 463.8 (282.0–705.6)         |
| <b>High income North America</b> | <b>5918.3 (5114.4–6866.2)</b> | <b>1643.8 (1243.0–2076.2)</b> | <b>7562.1 (6465.9–8780.2)</b> | <b>27.8 (21.7–34.1)</b> | <b>687.4 (468.7–961.2)</b>  | <b>190.8 (121.5–282.7)</b> | <b>878.2 (598.1–1230.3)</b> |
| Canada                           | 4539.3 (3665.8–5629.5)        | 948.5 (–233.4–2486.9)         | 5487.7 (3968.0–7472.6)        | 20.9 (–5.1–52.5)        | 535.6 (351.7–776.5)         | 111.7 (–24.6–299.7)        | 647.3 (395.6–1001.0)        |
| Greenland                        | 5127.5 (4064.6–6395.5)        | 893.8 (–420.2–2393.7)         | 6021.3 (4339.3–8069.3)        | 17.5 (–7.3–47.9)        | 605.1 (395.9–876.9)         | 105.8 (–43.1–316.7)        | 710.9 (435.3–1068.8)        |
| USA                              | 6072.0 (5260.5–7004.0)        | 1721.3 (1287.4–2189.8)        | 7793.3 (6670.2–9037.6)        | 28.4 (22.2–35.2)        | 704.4 (483.2–981.2)         | 199.5 (127.5–294.7)        | 904.0 (619.1–1267.9)        |
| <b>Southern Latin America</b>    | <b>5356.3 (4722.0–6055.4)</b> | <b>1972.2 (743.1–3244.6)</b>  | <b>7328.5 (5851.2–8922.7)</b> | <b>36.8 (13.9–60.0)</b> | <b>636.8 (437.4–898.1)</b>  | <b>234.2 (83.4–429.8)</b>  | <b>871.0 (565.0–1257.4)</b> |
| Argentina                        | 5171.3 (4648.1–5684.2)        | 1976.7 (375.1–3673.5)         | 7148.0 (5430.1–9103.9)        | 38.2 (7.2–70.9)         | 616.6 (427.0–862.5)         | 235.5 (45.0–484.5)         | 852.1 (538.6–1281.0)        |
| Chile                            | 5803.8 (4700.6–7134.7)        | 2165.2 (410.5–4262.1)         | 7969.1 (5889.3–10831.1)       | 37.4 (7.2–74.3)         | 685.7 (449.2–984.7)         | 255.4 (44.1–531.0)         | 941.1 (568.9–1439.6)        |
| Uruguay                          | 5419.3 (4414.9–6621.4)        | 887.4 (–551.2–2401.1)         | 6306.7 (4544.5–8518.1)        | 16.4 (–10.5–43.4)       | 642.1 (420.9–918.2)         | 105.4 (–65.2–307.8)        | 747.5 (447.5–1147.6)        |
| <b>Western Europe</b>            | <b>5935.3 (5000.5–7016.8)</b> | <b>1482.6 (963.6–2090.0)</b>  | <b>7417.9 (6216.2–8868.3)</b> | <b>25.0 (16.6–34.1)</b> | <b>697.0 (472.7–976.3)</b>  | <b>174.0 (99.5–271.1)</b>  | <b>870.9 (585.8–1239.2)</b> |
| Andorra                          | 5852.2 (4790.8–7172.8)        | 1950.7 (242.6–3873.8)         | 7802.9 (5625.3–10375.6)       | 33.4 (4.4–66.4)         | 690.6 (453.5–984.8)         | 229.2 (24.4–492.8)         | 919.8 (581.6–1369.1)        |
| Austria                          | 6173.3 (5040.4–7547.2)        | 1387.0 (–209.7–3177.0)        | 7560.3 (5594.5–9886.4)        | 22.5 (–3.1–51.5)        | 728.4 (491.9–1045.5)        | 163.0 (–21.9–379.1)        | 891.4 (543.8–1326.4)        |
| Belgium                          | 5360.8 (4358.2–6505.2)        | 1575.2 (–36.5–3436.7)         | 6936.1 (4952.8–9206.1)        | 29.3 (–0.7–60.8)        | 630.7 (419.3–902.8)         | 185.0 (–4.5–421.1)         | 815.7 (512.2–1253.5)        |
| Cyprus                           | 6326.8 (5109.0–7766.7)        | 1199.2 (–313.1–3039.4)        | 7526.0 (5452.3–9988.6)        | 18.9 (–5.0–46.6)        | 751.0 (496.5–1083.9)        | 142.6 (–36.8–382.6)        | 893.6 (557.3–1368.6)        |
| Denmark                          | 5396.8 (4419.3–6555.8)        | 991.8 (–402.3–2752.0)         | 6388.5 (4606.7–8722.2)        | 18.3 (–7.5–51.0)        | 637.4 (421.6–916.1)         | 116.1 (–48.6–339.4)        | 753.5 (458.2–1140.0)        |
| Finland                          | 4187.8 (3428.5–5064.8)        | 470.6 (–535.1–1713.2)         | 4658.4 (3281.6–6271.4)        | 11.2 (–12.6–40.0)       | 492.4 (325.5–698.3)         | 55.5 (–64.8–220.1)         | 547.9 (342.3–837.6)         |
| France                           | 6613.0 (5415.9–8002.3)        | 2159.6 (327.3–4409.7)         | 8772.7 (6380.2–11735.5)       | 32.7 (5.0–68.9)         | 777.2 (519.5–1103.2)        | 253.2 (36.7–576.1)         | 1030.4 (648.1–1583.2)       |
| Germany                          | 6650.9 (5407.5–8046.3)        | 1093.6 (–516.6–3111.8)        | 7744.5 (5728.7–10285.8)       | 16.5 (–8.0–46.7)        | 775.9 (513.8–1106.3)        | 127.9 (–58.2–385.0)        | 903.8 (544.6–1345.9)        |
| Greece                           | 5992.9 (4888.1–7219.5)        | 1179.6 (–354.3–3033.5)        | 7172.5 (5234.4–9598.7)        | 19.7 (–6.0–50.1)        | 704.0 (469.6–1007.1)        | 139.0 (–40.7–376.7)        | 842.9 (529.9–1255.2)        |
| Iceland                          | 5495.9 (4467.3–6630.8)        | 1046.3 (–353.6–2587.8)        | 6542.2 (4796.0–8628.3)        | 19.1 (–6.7–47.5)        | 653.1 (432.1–929.8)         | 124.5 (–41.1–342.6)        | 777.6 (473.7–1179.3)        |

|                                    |                               |                               |                                |                         |                            |                            |                             |
|------------------------------------|-------------------------------|-------------------------------|--------------------------------|-------------------------|----------------------------|----------------------------|-----------------------------|
| Ireland                            | 6720.1 (5441.2–8163.4)        | 1794.1 (–44.8–3833.4)         | 8514.2 (6100.0–11271.1)        | 26.7 (–0.7–57.6)        | 795.8 (528.5–1139.1)       | 211.6 (–5.8–477.5)         | 1007.4 (631.3–1493.1)       |
| Israel                             | 3801.4 (3122.7–4613.5)        | 1052.8 (–5.9–2427.4)          | 4854.2 (3534.4–6614.9)         | 27.7 (–0.1–62.6)        | 454.4 (302.4–650.0)        | 125.6 (–0.9–295.4)         | 580.0 (357.9–877.8)         |
| Italy                              | 5808.1 (5065.5–6603.5)        | 1427.6 (917.9–1993.6)         | 7235.7 (6209.1–8312.0)         | 24.6 (16.0–33.8)        | 681.0 (463.3–955.8)        | 167.0 (100.8–267.5)        | 848.0 (574.6–1187.5)        |
| Luxembourg                         | 5656.8 (4588.5–6911.6)        | 1559.8 (–3.6–3440.5)          | 7216.6 (5120.2–9710.0)         | 27.5 (–0.1–57.8)        | 669.0 (440.1–955.0)        | 184.2 (–0.5–409.4)         | 853.2 (512.3–1292.2)        |
| Malta                              | 6152.6 (4984.6–7514.5)        | 1174.9 (–451.4–2993.1)        | 7327.5 (5367.8–9725.0)         | 19.2 (–6.9–48.1)        | 725.7 (484.5–1045.4)       | 138.4 (–51.5–382.2)        | 864.1 (534.3–1315.4)        |
| Monaco                             | 5734.7 (4687.0–6961.4)        | 1242.7 (–231.8–2966.0)        | 6977.4 (5054.9–9173.3)         | 21.7 (–4.7–53.2)        | 673.2 (443.3–972.3)        | 145.5 (–26.1–356.7)        | 818.7 (498.6–1219.9)        |
| Netherlands                        | 6786.8 (5533.5–8182.5)        | 1845.7 (75.0–4056.9)          | 8632.5 (6377.9–11410.4)        | 27.3 (1.0–58.4)         | 801.7 (535.1–1146.5)       | 217.1 (8.3–501.1)          | 1018.8 (643.9–1514.3)       |
| Norway                             | 7106.9 (6188.5–8121.7)        | 1199.6 (549.2–1880.3)         | 8306.5 (7135.6–9729.2)         | 16.9 (7.8–25.9)         | 841.2 (576.2–1179.6)       | 141.9 (59.8–249.0)         | 983.1 (666.6–1373.0)        |
| Portugal                           | 8239.7 (6710.7–10034.1)       | 2417.1 (233.6–5100.4)         | 10656.8 (7936.4–14028.2)       | 29.3 (3.1–62.0)         | 964.5 (640.6–1379.5)       | 283.3 (30.9–641.8)         | 1247.8 (772.4–1937.0)       |
| San Marino                         | 5826.7 (4743.4–7088.0)        | 1881.2 (104.9–3959.2)         | 7707.8 (5564.7–10262.4)        | 32.3 (1.7–67.7)         | 684.7 (458.1–969.5)        | 219.7 (11.0–478.6)         | 904.4 (563.9–1332.0)        |
| Spain                              | 5078.6 (4156.6–6136.7)        | 1579.3 (197.5–3359.3)         | 6657.9 (4863.8–8969.1)         | 31.1 (3.7–64.6)         | 597.5 (389.6–847.7)        | 186.0 (22.7–400.9)         | 783.5 (465.6–1151.2)        |
| Sweden                             | 5281.3 (4613.2–6007.3)        | 1228.5 (70.3–2641.4)          | 6509.8 (5170.6–8072.9)         | 23.3 (1.4–50.9)         | 624.2 (421.6–872.1)        | 145.0 (7.0–334.8)          | 769.2 (488.9–1126.6)        |
| Switzerland                        | 7138.1 (5851.4–8634.1)        | 1080.8 (–636.3–3282.0)        | 8218.9 (5947.7–11211.2)        | 15.1 (–9.2–44.9)        | 839.0 (560.9–1192.5)       | 127.7 (–74.4–414.0)        | 966.7 (579.3–1475.1)        |
| UK                                 | 4803.4 (4160.3–5484.5)        | 1380.7 (1145.9–1664.1)        | 6184.1 (5391.0–7102.4)         | 28.8 (24.6–33.0)        | 564.7 (385.9–789.9)        | 162.2 (106.9–234.0)        | 726.9 (491.8–1015.4)        |
| <b>Latin America and Caribbean</b> | <b>5705.9 (4865.4–6732.9)</b> | <b>1804.1 (1425.8–2225.1)</b> | <b>7510.0 (6397.9–8786.6)</b>  | <b>31.7 (25.8–37.7)</b> | <b>677.7 (457.5–958.2)</b> | <b>214.1 (142.6–307.3)</b> | <b>891.8 (603.3–1250.3)</b> |
| <b>Andean Latin America</b>        | <b>5337.8 (4287.4–6703.7)</b> | <b>2774.6 (1648.6–4159.3)</b> | <b>8112.4 (6338.1–10270.2)</b> | <b>52.2 (30.7–75.6)</b> | <b>640.7 (418.5–931.7)</b> | <b>332.7 (178.2–536.9)</b> | <b>973.4 (631.4–1448.6)</b> |
| Bolivia                            | 5378.1 (4305.0–6715.8)        | 2722.5 (925.6–5011.9)         | 8100.5 (5851.2–10966.1)        | 50.8 (17.8–91.4)        | 644.5 (420.8–938.5)        | 326.1 (108.1–654.7)        | 970.5 (602.1–1471.0)        |
| Ecuador                            | 5135.2 (4109.2–6446.0)        | 2475.0 (886.4–4517.9)         | 7610.2 (5515.1–10223.2)        | 48.3 (18.7–86.6)        | 616.8 (402.3–893.2)        | 296.6 (105.2–567.0)        | 913.4 (564.1–1356.1)        |
| Peru                               | 5430.3 (4350.7–6812.7)        | 2949.6 (1179.5–5057.5)        | 8379.9 (6122.0–11173.5)        | 54.5 (22.3–92.8)        | 652.0 (422.4–954.2)        | 353.9 (133.0–672.6)        | 1005.8 (632.4–1508.9)       |
| <b>Caribbean</b>                   | <b>4517.0 (3646.4–5539.4)</b> | <b>1036.0 (441.6–1722.2)</b>  | <b>5553.0 (4445.6–7035.9)</b>  | <b>23.0 (10.2–37.7)</b> | <b>537.1 (352.0–774.8)</b> | <b>123.3 (50.2–232.6)</b>  | <b>660.4 (424.8–957.1)</b>  |
| Antigua and Barbuda                | 4738.5 (3823.7–5849.7)        | 1018.5 (–244.0–2542.5)        | 5757.1 (4137.5–7786.2)         | 21.5 (–6.0–52.3)        | 564.1 (371.4–816.2)        | 121.9 (–27.2–319.8)        | 686.0 (405.1–1057.7)        |
| Bahamas                            | 4706.6 (3791.1–5840.8)        | 1789.3 (393.2–3564.2)         | 6495.9 (4720.3–8772.3)         | 38.1 (9.3–73.4)         | 561.4 (364.0–807.8)        | 212.6 (49.3–429.4)         | 774.1 (487.2–1173.9)        |
| Barbados                           | 4789.6 (3855.2–5883.5)        | 932.0 (–313.0–2343.9)         | 5721.6 (4167.0–7460.3)         | 19.6 (–6.5–52.7)        | 566.7 (372.8–819.8)        | 110.6 (–36.7–298.5)        | 677.3 (411.0–1055.4)        |
| Belize                             | 4288.9 (3452.5–5406.2)        | 1662.6 (344.7–3261.8)         | 5951.5 (4218.9–8114.8)         | 38.8 (8.5–73.6)         | 515.0 (336.9–749.8)        | 198.7 (40.7–406.6)         | 713.8 (436.7–1077.9)        |
| Bermuda                            | 4809.2 (3935.0–5915.0)        | 1023.7 (–241.5–2586.2)        | 5832.9 (4222.8–7918.2)         | 21.3 (–5.2–52.7)        | 568.9 (372.1–813.5)        | 120.9 (–27.3–323.2)        | 689.9 (413.8–1048.0)        |
| Cuba                               | 4693.5 (3799.0–5755.7)        | 911.6 (–336.5–2544.9)         | 5605.0 (4060.8–7732.3)         | 19.4 (–7.3–51.6)        | 554.5 (370.2–793.1)        | 108.2 (–37.0–314.1)        | 662.7 (406.0–1022.0)        |
| Dominica                           | 4578.7 (3723.6–5619.5)        | 939.2 (–284.4–2503.3)         | 5517.8 (3995.9–7537.4)         | 20.5 (–6.6–52.9)        | 543.5 (359.1–788.4)        | 110.7 (–35.9–303.1)        | 654.2 (398.6–998.9)         |
| Dominican Republic                 | 4460.1 (3590.0–5553.4)        | 1438.1 (165.9–2973.5)         | 5898.1 (4210.8–7945.8)         | 32.3 (3.5–66.7)         | 534.6 (347.8–778.8)        | 173.0 (19.4–381.3)         | 707.6 (418.6–1096.1)        |
| Grenada                            | 4603.1 (3706.9–5696.3)        | 881.1 (–397.7–2315.8)         | 5484.2 (3866.8–7444.0)         | 19.2 (–8.2–49.5)        | 548.4 (357.8–801.2)        | 105.3 (–48.0–294.6)        | 653.7 (393.8–996.8)         |
| Guyana                             | 4431.4 (3552.4–5504.4)        | 1295.0 (89.0–2859.2)          | 5726.4 (4108.2–7901.9)         | 29.3 (2.2–63.2)         | 525.9 (346.5–766.4)        | 153.4 (10.7–355.5)         | 679.3 (409.7–1040.7)        |
| Haiti                              | 4323.6 (3451.6–5409.5)        | 694.2 (–429.8–2073.7)         | 5017.8 (3556.9–6834.1)         | 16.2 (–10.1–47.8)       | 514.5 (336.3–750.9)        | 82.4 (–53.0–250.1)         | 596.9 (359.6–906.7)         |
| Jamaica                            | 4477.2 (3604.6–5553.8)        | 914.3 (–235.3–2262.0)         | 5391.5 (3901.1–7285.7)         | 20.4 (–4.9–49.4)        | 535.7 (348.7–776.6)        | 109.6 (–29.2–292.9)        | 645.3 (385.6–1002.7)        |

|                                     |                               |                               |                                |                         |                             |                            |                              |
|-------------------------------------|-------------------------------|-------------------------------|--------------------------------|-------------------------|-----------------------------|----------------------------|------------------------------|
| Puerto Rico                         | 4896.5 (3968.8–5989.9)        | 1347.6 (–34.2–3042.3)         | 6244.1 (4517.3–8369.7)         | 27.6 (–0.8–60.5)        | 576.7 (378.3–832.4)         | 157.7 (–4.2–357.7)         | 734.4 (460.3–1110.0)         |
| Saint Kitts and Nevis               | 4774.4 (3839.2–5913.9)        | 965.5 (–311.9–2438.9)         | 5739.9 (4146.7–7765.2)         | 20.2 (–5.9–49.5)        | 567.5 (369.9–820.0)         | 114.7 (–34.2–301.7)        | 682.2 (418.9–1057.0)         |
| Saint Lucia                         | 4731.7 (3851.8–5871.0)        | 956.2 (–274.2–2480.5)         | 5687.9 (4147.3–7619.5)         | 20.3 (–5.9–52.6)        | 560.3 (371.2–808.1)         | 113.0 (–32.2–306.5)        | 673.3 (420.8–1029.6)         |
| Saint Vincent and the Grenadines    | 4521.9 (3675.4–5577.2)        | 840.5 (–341.5–2342.5)         | 5362.5 (3857.1–7314.7)         | 18.6 (–7.6–51.0)        | 537.4 (351.4–767.5)         | 99.9 (–39.1–292.4)         | 637.3 (384.7–981.9)          |
| Suriname                            | 4398.0 (3573.8–5427.3)        | 1210.4 (–54.7–2636.0)         | 5608.4 (4048.9–7562.2)         | 27.5 (–1.2–58.9)        | 521.5 (340.1–756.3)         | 143.0 (–6.1–351.5)         | 664.4 (401.9–1023.0)         |
| Trinidad and Tobago                 | 4376.6 (3520.6–5381.5)        | 951.4 (–241.4–2465.4)         | 5328.0 (3829.5–7400.5)         | 21.6 (–5.7–54.5)        | 517.5 (338.4–757.4)         | 112.5 (–27.1–308.3)        | 630.0 (378.0–966.7)          |
| Virgin Islands                      | 4741.7 (3843.8–5828.2)        | 625.7 (–579.8–2145.6)         | 5367.4 (3853.8–7373.4)         | 13.2 (–12.4–44.6)       | 557.2 (371.6–801.0)         | 73.3 (–68.5–263.4)         | 630.5 (391.5–970.6)          |
| <b>Central Latin America</b>        | <b>4037.2 (3400.5–4805.2)</b> | <b>1512.4 (1091.1–1966.1)</b> | <b>5549.6 (4579.0–6623.4)</b>  | <b>37.5 (28.3–47.0)</b> | <b>482.8 (323.0–685.3)</b>  | <b>180.8 (114.6–272.5)</b> | <b>663.6 (444.0–947.8)</b>   |
| Colombia                            | 4865.0 (3889.5–6011.4)        | 1718.6 (308.6–3349.0)         | 6583.5 (4801.4–8673.7)         | 35.4 (6.6–68.8)         | 582.8 (378.3–833.7)         | 206.2 (30.8–422.5)         | 789.0 (488.4–1202.2)         |
| Costa Rica                          | 4379.9 (3554.3–5457.7)        | 1554.5 (179.6–3123.6)         | 5934.3 (4256.6–8130.7)         | 35.6 (4.4–70.9)         | 522.9 (340.9–757.1)         | 184.8 (21.8–393.5)         | 707.7 (431.1–1078.1)         |
| El Salvador                         | 4357.9 (3509.6–5462.0)        | 1111.2 (–120.5–2614.0)        | 5469.1 (3829.8–7397.4)         | 25.6 (–2.6–57.7)        | 521.4 (343.0–753.1)         | 133.2 (–13.6–323.4)        | 654.5 (394.9–989.2)          |
| Guatemala                           | 4073.8 (3277.1–5166.1)        | 1608.4 (370.1–3214.6)         | 5682.2 (4004.0–7888.1)         | 39.4 (9.2–75.4)         | 487.1 (314.7–708.4)         | 192.0 (41.9–404.1)         | 679.1 (421.7–1048.4)         |
| Honduras                            | 4049.2 (3235.1–5061.8)        | 1879.6 (489.4–3531.9)         | 5928.8 (4184.9–8082.1)         | 46.4 (13.3–85.6)        | 487.3 (314.1–706.6)         | 227.2 (61.9–468.5)         | 714.5 (411.3–1116.3)         |
| Mexico                              | 3662.0 (3136.2–4233.4)        | 1455.6 (1135.9–1816.7)        | 5117.7 (4365.0–5954.1)         | 39.8 (32.8–48.0)        | 437.3 (295.4–616.9)         | 173.5 (113.6–250.4)        | 610.8 (414.7–858.4)          |
| Nicaragua                           | 4231.7 (3435.3–5314.3)        | 1084.5 (–131.6–2659.8)        | 5316.2 (3651.7–7478.0)         | 25.5 (–3.5–59.5)        | 508.4 (331.7–739.0)         | 130.4 (–13.7–330.6)        | 638.7 (382.3–1006.7)         |
| Panama                              | 3883.8 (3138.9–4791.2)        | 2179.1 (818.9–3955.0)         | 6062.9 (4398.7–8248.8)         | 56.2 (21.6–95.7)        | 465.1 (304.0–671.1)         | 259.9 (92.0–498.5)         | 725.1 (441.9–1086.8)         |
| Venezuela                           | 4142.1 (3334.7–5116.3)        | 1320.4 (138.5–2875.8)         | 5462.5 (3930.1–7312.8)         | 32.0 (3.3–66.0)         | 495.3 (324.9–720.4)         | 158.2 (15.7–354.7)         | 653.5 (404.7–995.6)          |
| <b>Tropical Latin America</b>       | <b>7925.4 (6842.8–9164.5)</b> | <b>2017.2 (1373.3–2702.5)</b> | <b>9942.6 (8533.9–11581.0)</b> | <b>25.5 (17.9–33.7)</b> | <b>934.8 (631.3–1310.4)</b> | <b>237.7 (141.4–366.1)</b> | <b>1172.5 (796.1–1634.3)</b> |
| Brazil                              | 7964.9 (6892.1–9191.2)        | 2016.5 (1362.4–2704.4)        | 9981.3 (8585.7–11601.4)        | 25.4 (17.7–33.9)        | 939.2 (634.0–1316.0)        | 237.5 (141.1–363.1)        | 1176.6 (802.5–1642.2)        |
| Paraguay                            | 6741.0 (5411.1–8347.3)        | 2039.7 (105.5–4211.3)         | 8780.7 (6441.2–11785.6)        | 30.3 (1.6–62.1)         | 805.1 (523.9–1168.8)        | 243.8 (13.8–548.3)         | 1048.8 (667.1–1629.0)        |
| <b>North Africa and Middle East</b> | <b>5148.9 (4210.4–6289.4)</b> | <b>1664.8 (1178.0–2251.6)</b> | <b>6813.6 (5557.9–8391.8)</b>  | <b>32.4 (24.9–41.1)</b> | <b>616.6 (408.5–882.7)</b>  | <b>198.8 (124.5–303.9)</b> | <b>815.4 (542.7–1166.8)</b>  |
| Afghanistan                         | 4565.5 (3556.9–5735.6)        | 1314.0 (2.9–2974.1)           | 5879.5 (4118.9–8276.5)         | 28.8 (0.1–61.4)         | 548.5 (348.1–814.8)         | 156.7 (0.2–366.6)          | 705.3 (431.9–1092.7)         |
| Algeria                             | 4890.2 (3935.6–6053.1)        | 1189.3 (–179.5–2786.5)        | 6079.5 (4380.7–8152.0)         | 24.4 (–3.6–58.3)        | 586.4 (382.2–853.4)         | 142.8 (–20.2–356.5)        | 729.2 (431.2–1092.8)         |
| Bahrain                             | 5110.6 (4048.3–6335.3)        | 1369.7 (–113.4–3113.1)        | 6480.3 (4465.5–8750.2)         | 26.8 (–2.2–58.3)        | 611.5 (397.6–881.5)         | 162.8 (–15.3–392.3)        | 774.3 (466.5–1176.9)         |
| Egypt                               | 4396.4 (3516.1–5510.3)        | 1632.1 (271.1–3445.4)         | 6028.6 (4264.0–8367.3)         | 37.2 (7.1–73.7)         | 530.2 (345.4–778.6)         | 196.6 (36.2–419.2)         | 726.7 (441.3–1120.4)         |
| Iran                                | 7147.5 (6142.3–8247.9)        | 2799.5 (2144.1–3523.8)        | 9947.0 (8535.3–11618.3)        | 39.2 (31.4–47.6)        | 849.1 (575.1–1189.9)        | 332.2 (214.1–494.8)        | 1181.3 (800.6–1672.0)        |
| Iraq                                | 5158.2 (4087.3–6444.5)        | 1749.6 (260.0–3621.2)         | 6907.9 (4931.8–9414.2)         | 34.0 (4.7–69.3)         | 619.7 (396.2–910.3)         | 209.1 (32.2–430.8)         | 828.8 (505.4–1259.5)         |
| Jordan                              | 5140.6 (4127.7–6416.7)        | 1136.9 (–338.6–2846.9)        | 6277.5 (4437.7–8777.6)         | 22.0 (–6.4–53.4)        | 621.5 (400.3–902.0)         | 137.5 (–33.8–366.5)        | 759.0 (456.2–1186.4)         |
| Kuwait                              | 5200.4 (4088.3–6552.4)        | 1631.7 (158.1–3458.2)         | 6832.1 (4851.8–9355.9)         | 31.4 (2.7–64.2)         | 622.4 (406.8–910.1)         | 195.6 (17.9–454.6)         | 817.9 (493.4–1227.3)         |
| Lebanon                             | 6284.8 (5061.4–7740.6)        | 1624.8 (–35.1–3723.1)         | 7909.6 (5697.3–10592.5)        | 25.9 (–0.7–57.8)        | 747.1 (482.8–1081.5)        | 192.4 (–4.6–446.7)         | 939.5 (580.3–1410.4)         |
| Libya                               | 5604.9 (4498.6–6910.8)        | 1508.0 (–9.5–3422.8)          | 7112.8 (5158.6–9674.7)         | 26.9 (–0.2–58.1)        | 670.2 (432.1–971.0)         | 180.5 (–2.7–425.7)         | 850.6 (502.7–1288.6)         |
| Morocco                             | 5099.8 (4106.5–6309.4)        | 1816.6 (262.8–3534.0)         | 6916.3 (4893.8–9379.5)         | 35.6 (5.4–67.4)         | 609.4 (392.7–882.9)         | 216.5 (28.8–453.6)         | 825.9 (501.9–1247.0)         |

|                                               |                               |                              |                               |                         |                            |                           |                            |
|-----------------------------------------------|-------------------------------|------------------------------|-------------------------------|-------------------------|----------------------------|---------------------------|----------------------------|
| Oman                                          | 4909.7 (3823.5–6195.0)        | 963.4 (–399.7–2490.5)        | 5873.1 (4124.7–8086.0)        | 19.7 (–7.3–48.6)        | 593.9 (378.6–868.9)        | 116.5 (–43.1–312.0)       | 710.4 (424.6–1114.0)       |
| Palestine                                     | 5279.3 (4177.5–6647.3)        | 1881.2 (272.9–3784.7)        | 7160.5 (4992.2–9801.9)        | 35.6 (5.3–73.3)         | 636.1 (404.0–921.3)        | 227.0 (29.9–512.6)        | 863.0 (518.7–1332.2)       |
| Qatar                                         | 4769.8 (3719.9–6064.0)        | 1486.3 (111.4–3124.6)        | 6256.2 (4279.1–8634.1)        | 31.1 (2.3–65.2)         | 575.9 (366.9–832.6)        | 178.9 (15.5–393.2)        | 754.9 (442.2–1139.6)       |
| Saudi Arabia                                  | 5146.2 (4076.4–6497.1)        | 1771.7 (239.7–3726.2)        | 6917.9 (4849.0–9637.7)        | 34.3 (4.9–68.7)         | 616.7 (396.6–912.8)        | 212.5 (27.8–477.1)        | 829.2 (502.9–1300.2)       |
| Sudan                                         | 4882.9 (3879.5–6189.9)        | 1410.8 (62.6–3185.1)         | 6293.8 (4492.2–8800.9)        | 28.9 (1.6–64.3)         | 589.3 (375.9–863.7)        | 168.8 (7.9–394.5)         | 758.1 (455.3–1173.3)       |
| Syria                                         | 5723.9 (4618.5–7103.1)        | 1193.6 (–275.0–3065.9)       | 6917.4 (4887.1–9439.0)        | 20.8 (–4.7–52.1)        | 682.4 (439.0–983.7)        | 141.9 (–33.6–379.6)       | 824.3 (501.4–1296.3)       |
| Tunisia                                       | 5389.4 (4363.9–6637.9)        | 1607.3 (14.1–3499.8)         | 6996.7 (4955.9–9490.8)        | 29.8 (0.3–64.7)         | 642.0 (417.8–930.2)        | 190.8 (1.8–432.9)         | 832.8 (511.7–1278.1)       |
| Turkey                                        | 4565.7 (3712.0–5628.0)        | 1598.1 (254.4–3335.1)        | 6163.8 (4363.8–8309.0)        | 35.1 (5.5–71.2)         | 545.4 (358.5–780.6)        | 189.6 (29.6–406.9)        | 735.0 (461.4–1084.2)       |
| United Arab Emirates                          | 4645.4 (3621.5–5905.3)        | 1117.8 (–124.1–2746.7)       | 5763.2 (4025.7–8091.4)        | 24.0 (–2.4–56.3)        | 557.3 (358.2–814.8)        | 134.0 (–15.6–336.5)       | 691.4 (406.4–1070.0)       |
| Yemen                                         | 4771.1 (3741.1–6028.6)        | 667.7 (–512.6–2097.7)        | 5438.8 (3881.6–7392.5)        | 14.1 (–10.8–43.8)       | 570.5 (369.2–830.6)        | 79.8 (–65.8–262.7)        | 650.3 (388.0–985.4)        |
| <b>South Asia</b>                             | <b>3019.7 (2590.4–3531.6)</b> | <b>1058.3 (813.0–1318.7)</b> | <b>4077.9 (3459.3–4786.7)</b> | <b>35.1 (28.2–42.0)</b> | <b>358.2 (243.5–503.0)</b> | <b>125.3 (81.0–181.3)</b> | <b>483.5 (328.8–679.5)</b> |
| Bangladesh                                    | 3184.4 (2552.4–4012.8)        | 1154.1 (137.8–2406.7)        | 4338.5 (3030.2–5966.6)        | 36.2 (4.6–75.3)         | 379.5 (247.9–551.5)        | 137.2 (14.9–314.1)        | 516.7 (311.3–796.6)        |
| Bhutan                                        | 3280.7 (2641.8–4124.8)        | 516.7 (–383.3–1531.7)        | 3797.4 (2624.2–5165.6)        | 15.8 (–11.4–46.8)       | 391.9 (255.6–577.1)        | 61.5 (–40.5–193.7)        | 453.4 (267.8–708.5)        |
| India                                         | 3013.4 (2594.0–3492.9)        | 1049.3 (816.8–1309.5)        | 4062.7 (3451.5–4734.1)        | 34.8 (28.5–41.5)        | 356.9 (242.8–500.6)        | 124.1 (81.5–180.0)        | 480.9 (327.5–675.3)        |
| Nepal                                         | 3121.5 (2507.2–3938.6)        | 1141.5 (159.4–2232.4)        | 4263.0 (3007.2–5758.7)        | 36.6 (4.8–71.5)         | 371.0 (242.1–542.9)        | 134.9 (18.3–276.6)        | 505.9 (314.0–768.5)        |
| Pakistan                                      | 2927.8 (2505.0–3426.4)        | 1036.4 (521.2–1687.2)        | 3964.2 (3182.4–4845.8)        | 35.4 (18.0–55.7)        | 349.5 (236.8–492.9)        | 123.4 (54.1–218.7)        | 473.0 (314.1–684.6)        |
| <b>Southeast Asia, east Asia, and Oceania</b> | <b>3367.2 (2903.3–3891.5)</b> | <b>466.0 (307.2–632.0)</b>   | <b>3833.2 (3281.8–4478.2)</b> | <b>13.8 (9.3–18.3)</b>  | <b>403.4 (271.6–571.6)</b> | <b>55.8 (31.8–85.0)</b>   | <b>459.2 (307.8–651.2)</b> |
| <b>East Asia</b>                              | <b>3302.6 (2862.8–3776.4)</b> | <b>361.9 (172.0–555.3)</b>   | <b>3664.6 (3158.1–4238.3)</b> | <b>11.0 (5.1–16.9)</b>  | <b>394.8 (266.3–558.0)</b> | <b>43.3 (17.8–74.5)</b>   | <b>438.0 (298.0–618.8)</b> |
| China                                         | 3284.4 (2851.3–3756.3)        | 366.9 (175.0–567.6)          | 3651.2 (3148.5–4220.1)        | 11.2 (5.3–17.3)         | 392.6 (264.9–554.6)        | 43.8 (18.4–74.8)          | 436.4 (296.0–617.4)        |
| North Korea                                   | 3745.9 (3042.5–4543.5)        | 259.8 (–702.8–1403.6)        | 4005.7 (2881.8–5489.9)        | 6.9 (–17.9–36.7)        | 450.2 (295.2–649.2)        | 30.7 (–89.2–178.5)        | 480.9 (293.9–771.8)        |
| Taiwan (province of China)                    | 3899.4 (3184.6–4748.5)        | 181.2 (–798.9–1221.7)        | 4080.6 (2931.6–5448.7)        | 4.7 (–19.6–32.7)        | 463.8 (305.0–664.1)        | 21.9 (–99.7–154.6)        | 485.6 (285.5–745.9)        |
| <b>Oceania</b>                                | <b>3542.6 (2827.0–4453.6)</b> | <b>42.7 (–578.6–838.4)</b>   | <b>3585.3 (2658.1–4801.5)</b> | <b>1.2 (–16.7–22.9)</b> | <b>427.6 (272.6–624.4)</b> | <b>5.1 (–73.8–98.6)</b>   | <b>432.7 (267.6–654.0)</b> |
| American Samoa                                | 3816.3 (3101.4–4738.1)        | 332.8 (–604.4–1398.3)        | 4149.1 (3000.2–5679.1)        | 8.7 (–15.4–37.0)        | 456.2 (299.1–658.5)        | 39.9 (–74.1–172.3)        | 496.0 (302.9–759.6)        |
| Cook Islands                                  | 4072.5 (3325.8–4949.2)        | 355.2 (–606.4–1555.6)        | 4427.8 (3215.6–5946.8)        | 8.8 (–15.1–37.1)        | 482.0 (316.7–699.5)        | 42.0 (–75.2–190.9)        | 524.0 (324.9–806.6)        |
| Federated States of Micronesia                | 3748.7 (3031.4–4608.4)        | 116.9 (–708.5–1276.4)        | 3865.6 (2714.7–5273.7)        | 3.1 (–18.9–34.1)        | 451.7 (290.1–656.0)        | 13.8 (–88.6–151.3)        | 465.6 (284.8–716.8)        |
| Fiji                                          | 3725.1 (3008.0–4562.6)        | 283.2 (–617.0–1359.5)        | 4008.3 (2873.7–5455.0)        | 7.7 (–16.7–36.5)        | 446.7 (290.0–641.4)        | 34.0 (–78.5–175.0)        | 480.7 (298.5–748.0)        |
| Guam                                          | 3798.5 (3099.8–4633.8)        | 878.6 (–245.5–2207.9)        | 4677.2 (3258.7–6331.9)        | 23.2 (–6.5–56.1)        | 455.8 (299.2–660.3)        | 105.4 (–29.6–281.3)       | 561.2 (341.9–875.0)        |
| Kiribati                                      | 3622.3 (2891.2–4498.7)        | 169.8 (–655.2–1171.4)        | 3792.2 (2697.7–5154.3)        | 4.7 (–18.0–30.9)        | 436.2 (278.6–629.6)        | 20.7 (–83.1–150.2)        | 456.9 (275.8–716.7)        |
| Marshall Islands                              | 3660.1 (2927.8–4583.0)        | 125.1 (–768.1–1189.2)        | 3785.2 (2681.4–5226.5)        | 3.4 (–20.7–30.6)        | 440.4 (284.2–637.6)        | 15.2 (–92.4–148.9)        | 455.6 (265.7–714.3)        |
| Nauru                                         | 3565.9 (2855.1–4454.2)        | 347.9 (–527.2–1451.2)        | 3913.7 (2712.9–5531.4)        | 9.7 (–14.5–39.2)        | 430.5 (273.4–628.3)        | 41.7 (–65.6–181.8)        | 472.2 (289.1–735.9)        |
| Niue                                          | 3956.6 (3224.6–4823.7)        | 338.4 (–625.6–1466.6)        | 4295.0 (3100.8–5893.3)        | 8.5 (–15.2–36.3)        | 469.1 (310.3–676.4)        | 39.7 (–78.6–177.3)        | 508.7 (322.6–779.0)        |



|                                   |                               |                            |                               |                         |                            |                          |                            |
|-----------------------------------|-------------------------------|----------------------------|-------------------------------|-------------------------|----------------------------|--------------------------|----------------------------|
| Northern Mariana Islands          | 4096.3 (3310.3–5014.0)        | 823.8 (–215.4–2233.3)      | 4920.1 (3581.0–6736.4)        | 20.1 (–5.9–53.9)        | 489.0 (322.0–711.2)        | 98.4 (–25.2–276.5)       | 587.4 (363.8–905.2)        |
| Palau                             | 3957.7 (3181.4–4839.9)        | 299.9 (–627.0–1429.5)      | 4257.5 (3079.9–5789.1)        | 7.6 (–15.7–35.6)        | 468.9 (310.9–677.8)        | 35.3 (–76.2–176.4)       | 504.3 (317.5–761.2)        |
| Papua New Guinea                  | 3518.8 (2782.9–4427.0)        | –6.7 (–810.7–949.6)        | 3512.1 (2500.9–4877.2)        | –0.3 (–23.1–27.2)       | 425.1 (269.0–619.8)        | –0.9 (–104.2–119.0)      | 424.3 (257.8–652.5)        |
| Samoa                             | 3556.1 (2891.2–4408.8)        | 78.5 (–744.3–1132.5)       | 3634.6 (2572.1–5063.8)        | 2.2 (–20.9–30.7)        | 428.8 (279.9–620.2)        | 9.0 (–96.6–132.5)        | 437.8 (262.4–665.4)        |
| Solomon Islands                   | 3459.0 (2747.7–4330.3)        | 36.9 (–758.0–875.4)        | 3495.9 (2489.4–4788.0)        | 1.1 (–22.1–26.0)        | 418.4 (271.6–612.2)        | 4.6 (–91.7–112.9)        | 423.0 (261.7–658.3)        |
| Tokelau                           | 3751.4 (3061.2–4623.9)        | 382.9 (–549.9–1420.8)      | 4134.2 (2932.9–5482.1)        | 10.3 (–14.6–38.8)       | 448.7 (297.5–648.9)        | 45.8 (–65.9–179.8)       | 494.6 (302.4–753.0)        |
| Tonga                             | 3610.1 (2904.8–4440.8)        | 335.7 (–557.4–1409.4)      | 3945.8 (2784.1–5327.1)        | 9.3 (–15.4–40.0)        | 435.3 (281.7–637.0)        | 41.3 (–68.0–179.9)       | 476.5 (289.1–745.9)        |
| Tuvalu                            | 3676.9 (2960.9–4526.2)        | 338.7 (–530.6–1443.0)      | 4015.6 (2863.2–5492.2)        | 9.2 (–14.9–37.8)        | 441.4 (287.7–638.1)        | 41.0 (–69.8–188.2)       | 482.3 (291.4–750.8)        |
| Vanuatu                           | 3459.9 (2759.0–4304.4)        | 35.4 (–722.9–951.8)        | 3495.4 (2496.3–4789.9)        | 1.1 (–21.1–28.0)        | 418.5 (268.3–605.3)        | 4.6 (–88.9–117.5)        | 423.1 (257.2–649.3)        |
| Southeast Asia                    | 3501.1 (2966.5–4123.2)        | 695.7 (454.0–970.2)        | 4196.7 (3535.9–4982.4)        | 19.9 (13.5–26.7)        | 421.1 (282.5–597.3)        | 83.6 (46.9–129.2)        | 504.8 (333.9–720.4)        |
| Cambodia                          | 3781.5 (3064.0–4689.8)        | 453.1 (–461.3–1632.8)      | 4234.6 (3003.6–5782.6)        | 12.0 (–12.0–42.2)       | 454.7 (296.0–657.9)        | 55.0 (–55.3–204.0)       | 509.7 (319.8–796.4)        |
| Indonesia                         | 3531.8 (3037.7–4088.6)        | 717.2 (412.0–1083.8)       | 4249.0 (3605.3–5017.2)        | 20.3 (12.2–29.0)        | 426.3 (285.9–596.7)        | 86.5 (42.5–141.1)        | 512.8 (343.9–723.5)        |
| Laos                              | 4328.1 (3558.8–5299.4)        | 613.8 (–450.0–1889.7)      | 4941.8 (3645.6–6561.9)        | 14.2 (–10.5–44.3)       | 523.7 (343.1–764.5)        | 73.5 (–56.5–230.5)       | 597.2 (378.1–897.9)        |
| Malaysia                          | 4461.5 (3557.7–5569.4)        | 618.3 (–461.3–2008.8)      | 5079.8 (3634.5–7139.4)        | 13.9 (–11.0–43.9)       | 535.9 (348.3–781.1)        | 74.3 (–53.4–257.3)       | 610.2 (362.7–930.1)        |
| Maldives                          | 3481.3 (2759.4–4449.8)        | 841.6 (–105.8–2094.3)      | 4322.9 (3089.2–6014.3)        | 24.2 (–3.0–57.1)        | 420.7 (270.9–613.3)        | 101.4 (–14.2–256.0)      | 522.1 (319.5–803.9)        |
| Mauritius                         | 3959.2 (3233.1–4879.5)        | 596.5 (–407.3–1813.2)      | 4555.7 (3314.2–6244.1)        | 15.1 (–10.3–45.0)       | 467.5 (306.8–673.4)        | 70.2 (–43.8–219.8)       | 537.7 (330.6–839.5)        |
| Myanmar                           | 3713.8 (2977.2–4527.2)        | 997.4 (–58.3–2240.0)       | 4711.1 (3409.6–6438.6)        | 26.9 (–1.5–60.0)        | 445.6 (288.0–639.1)        | 120.0 (–7.8–285.3)       | 565.6 (331.9–870.0)        |
| Philippines                       | 3778.4 (3240.2–4367.2)        | 1270.9 (1010.7–1577.9)     | 5049.3 (4324.5–5878.0)        | 33.6 (27.8–40.0)        | 455.4 (307.3–641.3)        | 153.0 (100.2–224.4)      | 608.4 (411.3–857.3)        |
| Seychelles                        | 3683.2 (2971.5–4544.8)        | 653.9 (–301.1–1831.3)      | 4337.2 (3103.4–5883.8)        | 17.8 (–7.7–47.9)        | 440.6 (289.5–635.6)        | 78.3 (–33.1–230.1)       | 518.9 (310.0–797.4)        |
| Sri Lanka                         | 3884.6 (3192.1–4743.0)        | 744.2 (–275.3–2008.0)      | 4628.8 (3304.5–6287.6)        | 19.1 (–7.1–51.2)        | 462.4 (302.7–669.9)        | 88.2 (–34.3–252.2)       | 550.6 (329.9–847.6)        |
| Thailand                          | 3761.5 (3035.5–4647.1)        | 300.2 (–644.3–1457.0)      | 4061.7 (2844.9–5549.6)        | 7.9 (–17.0–37.5)        | 446.6 (293.6–644.5)        | 35.6 (–80.2–170.8)       | 482.2 (289.8–723.5)        |
| Timor–Leste                       | 3246.8 (2598.9–4034.8)        | 502.7 (–370.2–1496.6)      | 3749.4 (2675.1–5001.2)        | 15.6 (–11.8–44.9)       | 392.6 (253.4–575.1)        | 61.2 (–44.1–194.2)       | 453.8 (272.3–718.9)        |
| Vietnam                           | 2284.5 (1835.6–2826.1)        | 158.4 (–386.8–830.3)       | 2442.8 (1721.6–3331.2)        | 6.9 (–17.2–34.5)        | 275.3 (181.4–396.9)        | 19.2 (–46.3–102.6)       | 294.5 (178.3–456.8)        |
| <b>Sub-Saharan Africa</b>         | <b>3001.9 (2465.1–3671.3)</b> | <b>644.0 (479.0–829.9)</b> | <b>3645.9 (2985.7–4475.5)</b> | <b>21.5 (17.1–25.7)</b> | <b>361.8 (237.5–519.5)</b> | <b>77.5 (50.0–116.0)</b> | <b>439.3 (289.0–633.7)</b> |
| <b>Central sub-Saharan Africa</b> | <b>3187.4 (2538.4–4034.5)</b> | <b>622.8 (8.0–1331.7)</b>  | <b>3810.1 (2857.6–5029.4)</b> | <b>19.6 (0.3–41.5)</b>  | <b>382.6 (246.2–554.2)</b> | <b>74.7 (0.7–169.5)</b>  | <b>457.2 (286.6–683.3)</b> |
| Angola                            | 3125.0 (2465.2–3980.2)        | 619.9 (–170.0–1646.0)      | 3744.9 (2651.6–5113.1)        | 19.9 (–5.6–52.1)        | 376.8 (239.1–547.2)        | 74.5 (–19.4–203.4)       | 451.3 (268.2–680.3)        |
| Central African Republic          | 3471.0 (2751.9–4401.7)        | 533.8 (–361.6–1618.5)      | 4004.8 (2882.3–5571.4)        | 15.5 (–11.0–44.0)       | 414.7 (265.7–603.5)        | 64.1 (–42.0–197.4)       | 478.8 (284.6–726.9)        |
| Congo                             | 3370.7 (2687.9–4216.7)        | 722.8 (–172.9–1819.8)      | 4093.4 (2915.8–5669.1)        | 21.4 (–4.9–52.6)        | 403.9 (259.0–591.7)        | 86.3 (–20.8–236.9)       | 490.2 (292.7–753.8)        |
| Democratic Republic of the Congo  | 3171.5 (2512.9–4028.9)        | 623.4 (–221.8–1599.5)      | 3794.9 (2713.1–5117.0)        | 19.7 (–7.0–50.7)        | 380.2 (243.2–550.4)        | 74.7 (–24.7–202.7)       | 454.9 (277.8–711.0)        |
| Equatorial Guinea                 | 3369.6 (2644.6–4354.7)        | 641.5 (–261.7–1745.8)      | 4011.1 (2788.1–5600.2)        | 19.0 (–7.9–48.4)        | 405.8 (258.0–589.5)        | 77.1 (–33.7–215.3)       | 482.8 (287.6–738.1)        |
| Gabon                             | 3496.1 (2775.4–4411.5)        | 598.2 (–334.7–1690.0)      | 4094.3 (2894.7–5645.9)        | 17.1 (–9.4–47.0)        | 418.2 (267.6–602.2)        | 71.5 (–38.4–199.9)       | 489.7 (284.1–745.2)        |
| <b>Eastern sub-Saharan Africa</b> | <b>3193.7 (2609.9–3956.1)</b> | <b>598.9 (365.7–870.5)</b> | <b>3792.6 (3084.1–4701.7)</b> | <b>18.8 (11.9–26.3)</b> | <b>385.4 (252.2–556.0)</b> | <b>72.2 (39.1–119.7)</b> | <b>457.6 (301.4–661.9)</b> |

|                                    |                               |                              |                               |                         |                            |                           |                            |
|------------------------------------|-------------------------------|------------------------------|-------------------------------|-------------------------|----------------------------|---------------------------|----------------------------|
| Burundi                            | 3076.4 (2430.2–3915.4)        | 313.2 (–457.0–1242.5)        | 3389.6 (2432.1–4738.6)        | 10.2 (–15.3–38.8)       | 370.3 (236.8–540.1)        | 37.4 (–60.4–150.9)        | 407.7 (248.3–635.6)        |
| Comoros                            | 3450.2 (2735.1–4354.5)        | 693.6 (–217.1–1853.3)        | 4143.8 (2879.3–5706.9)        | 20.1 (–6.2–52.5)        | 416.4 (265.7–606.0)        | 83.6 (–25.0–234.0)        | 500.0 (299.0–778.7)        |
| Djibouti                           | 3194.8 (2513.0–4046.4)        | 552.1 (–311.6–1557.0)        | 3746.9 (2617.6–5140.6)        | 17.3 (–10.1–47.9)       | 386.5 (248.2–561.1)        | 66.6 (–37.6–199.9)        | 453.1 (271.5–725.4)        |
| Eritrea                            | 3282.8 (2589.3–4171.5)        | 358.0 (–440.3–1312.1)        | 3640.8 (2541.4–5130.7)        | 10.9 (–13.4–39.6)       | 395.7 (253.6–578.3)        | 43.1 (–49.9–168.7)        | 438.9 (265.7–687.0)        |
| Ethiopia                           | 3154.2 (2671.6–3718.0)        | 612.4 (199.5–1074.0)         | 3766.6 (3037.8–4608.3)        | 19.4 (6.2–32.9)         | 381.7 (255.6–545.1)        | 74.1 (22.3–142.4)         | 455.8 (305.2–649.1)        |
| Kenya                              | 3179.6 (2712.1–3741.8)        | 972.6 (754.5–1208.9)         | 4152.2 (3531.3–4862.3)        | 30.6 (25.0–36.5)        | 384.2 (258.3–544.2)        | 117.4 (75.0–170.4)        | 501.6 (335.8–709.5)        |
| Madagascar                         | 3380.9 (2662.6–4333.4)        | 611.7 (–224.7–1656.4)        | 3992.7 (2792.1–5507.8)        | 18.1 (–7.1–46.5)        | 409.1 (260.0–602.0)        | 73.8 (–27.5–209.6)        | 482.9 (293.9–755.3)        |
| Malawi                             | 3255.8 (2573.6–4162.7)        | 601.0 (–229.6–1660.8)        | 3856.8 (2690.3–5260.1)        | 18.5 (–7.1–49.8)        | 393.7 (251.2–574.4)        | 71.9 (–26.3–201.6)        | 465.6 (275.2–711.9)        |
| Mozambique                         | 3191.5 (2521.1–4072.8)        | 485.8 (–312.6–1492.0)        | 3677.3 (2530.1–5054.7)        | 15.2 (–10.1–46.8)       | 379.9 (242.7–551.9)        | 58.3 (–36.2–185.2)        | 438.2 (264.6–676.6)        |
| Rwanda                             | 3376.7 (2685.5–4306.0)        | 563.7 (–335.7–1740.4)        | 3940.5 (2731.1–5489.1)        | 16.6 (–10.0–47.5)       | 406.5 (260.9–593.3)        | 67.3 (–42.4–208.8)        | 473.8 (283.1–729.3)        |
| Somalia                            | 2819.8 (2218.2–3577.7)        | 456.6 (–258.3–1293.5)        | 3276.4 (2224.2–4545.3)        | 16.2 (–10.5–47.1)       | 340.5 (215.6–505.3)        | 55.2 (–34.3–167.1)        | 395.7 (234.6–614.4)        |
| South Sudan                        | 3516.9 (2777.7–4440.2)        | 502.2 (–382.0–1566.1)        | 4019.1 (2833.3–5532.9)        | 14.3 (–11.3–42.3)       | 422.2 (271.0–618.5)        | 59.7 (–46.9–194.5)        | 481.9 (289.7–735.1)        |
| Uganda                             | 3152.0 (2455.1–4050.8)        | 667.4 (–155.6–1743.4)        | 3819.5 (2627.3–5273.1)        | 21.2 (–4.9–51.7)        | 381.3 (240.7–565.7)        | 80.3 (–19.8–221.4)        | 461.6 (285.5–733.8)        |
| Tanzania                           | 3217.5 (2560.7–4108.7)        | 503.9 (–288.5–1517.5)        | 3721.5 (2588.1–5179.7)        | 15.6 (–8.9–45.4)        | 388.3 (248.5–564.5)        | 61.1 (–36.1–188.8)        | 449.3 (272.0–710.0)        |
| Zambia                             | 3293.9 (2591.9–4201.4)        | 331.2 (–463.5–1322.2)        | 3625.1 (2608.8–5124.2)        | 10.0 (–14.2–38.2)       | 396.5 (253.6–583.0)        | 39.2 (–53.5–161.6)        | 435.7 (267.0–672.0)        |
| <b>Southern sub-Saharan Africa</b> | <b>3643.0 (3074.7–4332.9)</b> | <b>1272.8 (868.5–1755.5)</b> | <b>4915.9 (4094.3–5929.7)</b> | <b>35.0 (24.5–46.4)</b> | <b>432.0 (289.4–609.3)</b> | <b>150.6 (93.5–237.7)</b> | <b>582.6 (395.2–830.5)</b> |
| Botswana                           | 3598.0 (2868.1–4543.8)        | 404.6 (–517.3–1463.4)        | 4002.6 (2839.9–5605.4)        | 11.3 (–14.0–39.6)       | 429.0 (275.7–621.5)        | 48.1 (–60.4–181.5)        | 477.1 (286.0–750.4)        |
| Eswatini                           | 3346.9 (2679.8–4227.0)        | 1058.4 (124.0–2282.1)        | 4405.3 (3127.7–6114.0)        | 31.7 (4.3–65.9)         | 398.7 (252.9–581.4)        | 126.2 (13.7–284.4)        | 524.9 (312.7–808.5)        |
| Lesotho                            | 3468.4 (2759.1–4357.0)        | 808.8 (–159.3–1939.6)        | 4277.2 (3003.6–5863.4)        | 23.4 (–4.1–57.1)        | 411.6 (263.5–595.2)        | 96.3 (–18.0–248.7)        | 507.9 (306.8–786.6)        |
| Namibia                            | 3374.2 (2679.0–4236.2)        | 971.8 (–3.0–2230.8)          | 4346.0 (3083.0–6012.8)        | 28.7 (–0.1–63.6)        | 405.1 (264.4–588.8)        | 116.2 (–0.4–274.4)        | 521.3 (320.8–816.1)        |
| South Africa                       | 3861.2 (3292.9–4474.9)        | 1537.7 (1038.1–2115.0)       | 5399.0 (4492.6–6408.8)        | 39.9 (26.9–53.8)        | 456.3 (307.9–638.6)        | 181.3 (110.9–287.6)       | 637.6 (438.2–914.3)        |
| Zimbabwe                           | 2947.9 (2324.1–3752.8)        | 560.6 (–195.9–1522.5)        | 3508.5 (2479.2–4829.2)        | 19.1 (–6.6–50.4)        | 354.9 (227.1–515.7)        | 67.5 (–22.8–194.1)        | 422.4 (252.6–665.1)        |
| <b>Western sub-Saharan Africa</b>  | <b>2673.9 (2196.1–3249.5)</b> | <b>585.8 (429.9–763.3)</b>   | <b>3259.6 (2661.8–3969.7)</b> | <b>21.9 (17.0–27.5)</b> | <b>323.5 (211.0–467.3)</b> | <b>70.8 (43.0–110.4)</b>  | <b>394.4 (259.4–575.9)</b> |
| Benin                              | 2665.2 (2085.2–3392.0)        | 260.4 (–413.4–1003.3)        | 2925.6 (2042.4–4074.7)        | 9.8 (–15.4–37.7)        | 323.3 (204.1–476.8)        | 32.1 (–48.4–135.1)        | 355.4 (214.4–558.6)        |
| Burkina Faso                       | 2591.7 (2016.8–3291.3)        | 300.3 (–351.3–1189.8)        | 2892.0 (1944.3–4155.0)        | 11.4 (–14.4–44.4)       | 314.3 (197.2–461.7)        | 36.3 (–43.7–143.4)        | 350.6 (202.2–567.9)        |
| Cabo Verde                         | 2975.8 (2376.2–3726.2)        | 1415.3 (410.4–2791.0)        | 4391.1 (3154.3–6161.4)        | 47.7 (13.5–89.8)        | 358.9 (231.5–517.2)        | 170.0 (44.7–346.4)        | 528.8 (321.0–794.4)        |
| Cameroon                           | 2759.5 (2153.2–3525.9)        | 306.3 (–394.5–1138.2)        | 3065.8 (2135.6–4299.6)        | 11.1 (–13.9–42.3)       | 334.6 (209.6–501.0)        | 37.2 (–47.8–147.5)        | 371.9 (216.9–578.5)        |
| Chad                               | 2621.9 (2043.2–3356.7)        | 368.4 (–289.3–1228.6)        | 2990.3 (2077.2–4186.6)        | 14.0 (–11.7–48.8)       | 318.1 (203.1–467.2)        | 44.7 (–37.4–157.1)        | 362.8 (212.6–568.4)        |
| Côte d'Ivoire                      | 2783.3 (2195.1–3536.5)        | 340.3 (–355.2–1248.8)        | 3123.5 (2173.3–4356.6)        | 12.3 (–13.4–45.1)       | 337.1 (213.4–497.0)        | 41.6 (–41.8–158.9)        | 378.6 (232.8–590.2)        |
| The Gambia                         | 2831.1 (2228.7–3588.6)        | 504.4 (–280.6–1460.3)        | 3335.4 (2289.2–4668.9)        | 17.7 (–10.0–49.4)       | 342.4 (215.3–500.9)        | 60.9 (–32.3–191.5)        | 403.3 (228.7–641.0)        |
| Ghana                              | 2788.4 (2202.4–3528.5)        | 457.7 (–294.9–1416.6)        | 3246.1 (2297.0–4525.8)        | 16.5 (–10.8–50.1)       | 337.4 (216.0–491.2)        | 55.9 (–32.4–182.1)        | 393.3 (226.4–622.2)        |
| Guinea                             | 2768.3 (2188.1–3570.9)        | 463.4 (–257.8–1383.7)        | 3231.7 (2211.0–4524.2)        | 16.7 (–8.8–46.9)        | 335.6 (211.2–490.0)        | 56.0 (–30.6–171.6)        | 391.6 (228.6–620.9)        |

|                       |                        |                       |                        |                   |                     |                    |                     |
|-----------------------|------------------------|-----------------------|------------------------|-------------------|---------------------|--------------------|---------------------|
| Guinea-Bissau         | 2686.5 (2083.7-3418.9) | 436.5 (-235.6-1315.6) | 3122.9 (2172.2-4344.0) | 16.2 (-9.2-48.7)  | 325.3 (203.2-480.5) | 53.2 (-27.2-160.4) | 378.5 (220.6-599.9) |
| Liberia               | 2944.8 (2314.8-3716.4) | 498.2 (-273.8-1530.9) | 3443.1 (2389.1-4822.8) | 16.8 (-9.8-49.0)  | 351.3 (224.6-513.2) | 59.6 (-34.0-185.7) | 410.9 (244.1-645.1) |
| Mali                  | 2392.9 (1878.7-3025.3) | 447.2 (-208.0-1229.4) | 2840.1 (1998.5-3933.6) | 18.7 (-9.0-50.4)  | 289.9 (183.6-426.1) | 53.8 (-24.9-151.4) | 343.6 (204.7-531.7) |
| Mauritania            | 2598.4 (2068.4-3271.6) | 550.0 (-172.0-1348.5) | 3148.3 (2222.5-4320.6) | 21.2 (-6.9-52.2)  | 315.9 (199.6-461.0) | 66.9 (-19.1-178.6) | 382.9 (225.0-600.1) |
| Niger                 | 2416.4 (1881.0-3076.5) | 266.3 (-297.7-1007.7) | 2682.6 (1874.8-3604.7) | 11.2 (-12.5-41.4) | 294.5 (185.2-430.9) | 32.8 (-36.3-125.2) | 327.4 (196.2-515.9) |
| Nigeria               | 2663.9 (2256.3-3115.9) | 798.6 (607.7-1015.9)  | 3462.5 (2912.4-4095.4) | 30.0 (24.3-36.0)  | 321.9 (212.9-458.4) | 96.3 (62.2-140.1)  | 418.2 (281.5-597.2) |
| São Tomé and Príncipe | 2912.7 (2309.7-3713.6) | 540.2 (-235.2-1469.6) | 3453.0 (2438.6-4811.3) | 18.5 (-7.8-49.4)  | 353.8 (225.7-511.9) | 65.4 (-27.4-188.6) | 419.2 (253.1-654.0) |
| Senegal               | 2685.1 (2128.8-3379.5) | 794.2 (20.3-1797.7)   | 3479.3 (2422.1-4859.4) | 29.5 (0.9-66.4)   | 324.4 (205.6-479.4) | 96.1 (2.6-230.0)   | 420.5 (249.3-663.9) |
| Sierra Leone          | 3013.6 (2376.7-3873.1) | 431.8 (-348.3-1319.0) | 3445.4 (2374.7-4741.8) | 14.3 (-11.6-42.3) | 364.5 (229.7-538.6) | 52.2 (-39.7-170.3) | 416.7 (246.0-649.1) |
| Togo                  | 2992.8 (2383.6-3810.2) | 380.1 (-385.2-1359.0) | 3372.9 (2335.7-4707.6) | 12.7 (-13.2-42.6) | 361.8 (230.6-528.7) | 45.8 (-47.7-167.9) | 407.6 (239.7-628.7) |

**Table S9: Prevalence and DALYs of anxiety disorders in 1000s, with 95% uncertainty intervals, by location, for the year 2020**

| Location                                                | Baseline prevalence           | Additional prevalence      | Final prevalence              | % change                | Baseline DALYs             | Additional DALYs         | Final DALYs                |
|---------------------------------------------------------|-------------------------------|----------------------------|-------------------------------|-------------------------|----------------------------|--------------------------|----------------------------|
| <b>Global</b>                                           | <b>298000 (256000–348000)</b> | <b>76200 (64300–90600)</b> | <b>374000 (320000–436000)</b> | <b>25.6 (23.2–28.0)</b> | <b>35500 (23900–50100)</b> | <b>9050 (6180–12800)</b> | <b>44500 (30200–62500)</b> |
| <b>Central Europe, eastern Europe, and central Asia</b> | <b>13800 (11800–16100)</b>    | <b>4130 (3260–5110)</b>    | <b>17900 (15100–20900)</b>    | <b>30.0 (24.9–35.0)</b> | <b>1620 (1090–2290)</b>    | <b>486 (322–701)</b>     | <b>2110 (1420–2960)</b>    |
| <b>Central Asia</b>                                     | <b>2030 (1640–2520)</b>       | <b>677 (382–1010)</b>      | <b>2700 (2100–3390)</b>       | <b>33.4 (19.1–47.9)</b> | <b>244 (157–353)</b>       | <b>81.1 (38.7–134)</b>   | <b>325 (209–472)</b>       |
| Armenia                                                 | 82.9 (67.1–102)               | 31.6 (6.56–63.2)           | 114 (82.6–155)                | 38.2 (7.7–74.3)         | 9.86 (6.53–14.3)           | 3.76 (0.743–7.95)        | 13.6 (8.17–20.4)           |
| Azerbaijan                                              | 244 (196–302)                 | 78.2 (2.63–172)            | 323 (221–439)                 | 32.0 (1.1–69.0)         | 29.4 (19.3–42.5)           | 9.4 (0.304–22.2)         | 38.8 (23.1–60.3)           |
| Georgia                                                 | 87.9 (71.3–107)               | 27.3 (2.04–59.1)           | 115 (82.2–156)                | 31.2 (2.4–65.8)         | 10.4 (6.85–15.1)           | 3.23 (0.272–7.45)        | 13.6 (8.22–20.5)           |
| Kazakhstan                                              | 384 (310–474)                 | 130 (17.1–273)             | 514 (369–698)                 | 34.0 (4.1–69.3)         | 45.9 (29.8–66.4)           | 15.5 (1.89–34.1)         | 61.4 (37.6–95.5)           |
| Kyrgyzstan                                              | 132 (106–163)                 | 63.4 (17.4–121)            | 195 (139–273)                 | 48.2 (14.3–90.0)        | 15.9 (10.1–23.2)           | 7.61 (1.95–15)           | 23.5 (14.1–35.8)           |
| Mongolia                                                | 70.2 (56–88.1)                | 1.25 (–15.5–20.4)          | 71.5 (50.3–98.7)              | 1.8 (–22.3–28.8)        | 8.43 (5.43–11.9)           | 0.147 (–1.94–2.61)       | 8.58 (5.02–12.9)           |
| Tajikistan                                              | 203 (162–258)                 | 67 (7.9–140)               | 270 (193–373)                 | 33.0 (3.7–67.6)         | 24.6 (15.8–35.7)           | 8.11 (0.796–18)          | 32.7 (19.5–51.1)           |
| Turkmenistan                                            | 110 (87.9–137)                | 38.5 (3.87–80.1)           | 149 (108–204)                 | 35.0 (3.4–70.8)         | 13.3 (8.71–19.3)           | 4.65 (0.421–10.4)        | 17.9 (10.9–28)             |
| Uzbekistan                                              | 714 (568–896)                 | 239 (27.2–504)             | 953 (663–1320)                | 33.5 (3.8–67.7)         | 86.2 (54.9–127)            | 28.7 (2.99–63.5)         | 115 (69.2–176)             |
| <b>Central Europe</b>                                   | <b>4200 (3520–5000)</b>       | <b>1130 (764–1570)</b>     | <b>5330 (4410–6470)</b>       | <b>26.9 (18.9–34.9)</b> | <b>493 (329–709)</b>       | <b>132 (76.2–205)</b>    | <b>625 (420–890)</b>       |
| Albania                                                 | 105 (84.9–128)                | 38.3 (6.69–77.3)           | 143 (104–191)                 | 36.5 (6.1–71.5)         | 12.5 (8.26–18)             | 4.54 (0.703–9.67)        | 17 (10.5–26.2)             |
| Bosnia and Herzegovina                                  | 127 (103–158)                 | 36.8 (2.22–83.5)           | 164 (117–223)                 | 28.9 (1.8–63.6)         | 14.9 (9.95–21.5)           | 4.3 (0.256–10.2)         | 19.2 (12–29.2)             |
| Bulgaria                                                | 269 (218–330)                 | 69.1 (–2.99–158)           | 338 (245–456)                 | 25.7 (–1.2–57.6)        | 31.5 (21–45.6)             | 8.07 (–0.339–20.1)       | 39.5 (24.6–60.8)           |
| Croatia                                                 | 166 (135–204)                 | 36.5 (–8.85–89.5)          | 203 (144–278)                 | 22.0 (–5.5–52.1)        | 19.5 (13–28.2)             | 4.26 (–1.04–10.9)        | 23.7 (14.6–36.2)           |
| Czechia                                                 | 382 (311–469)                 | 101 (–3.12–242)            | 484 (352–667)                 | 26.5 (–0.8–61.6)        | 44.6 (29.2–64)             | 11.8 (–0.436–28.2)       | 56.5 (34–85.2)             |
| Hungary                                                 | 368 (299–449)                 | 60.2 (–33.9–173)           | 429 (309–586)                 | 16.3 (–9.2–46.8)        | 43 (28.8–62.7)             | 7.05 (–3.84–21.6)        | 50.1 (30.4–78.2)           |
| Montenegro                                              | 23.9 (19.4–29.2)              | 7.91 (0.734–16.6)          | 31.8 (22.3–42.4)              | 33.2 (3.2–69.0)         | 2.82 (1.86–4.05)           | 0.936 (0.0824–2.16)      | 3.76 (2.23–5.68)           |
| North Macedonia                                         | 82 (67–100)                   | 30 (5.53–62.1)             | 112 (80.2–152)                | 36.6 (7.1–73.8)         | 9.69 (6.35–14)             | 3.55 (0.644–7.72)        | 13.2 (8.14–20.5)           |
| Poland                                                  | 1380 (1190–1590)              | 348 (234–471)              | 1730 (1480–2000)              | 25.3 (17.5–33.8)        | 162 (110–227)              | 40.8 (24.2–63.6)         | 203 (139–280)              |
| Romania                                                 | 686 (556–845)                 | 237 (18.3–504)             | 924 (655–1260)                | 34.6 (3.2–69.1)         | 80.7 (53.3–117)            | 27.9 (1.85–63.6)         | 109 (65.1–166)             |
| Serbia                                                  | 328 (266–400)                 | 91.4 (1.97–219)            | 419 (307–567)                 | 27.9 (0.6–64.7)         | 38.6 (25.3–56)             | 10.7 (0.224–26.3)        | 49.3 (30.3–74.5)           |
| Slovakia                                                | 204 (166–249)                 | 51.6 (–2.2–110)            | 256 (191–343)                 | 25.3 (–1.1–54.1)        | 24 (15.8–34.7)             | 6.1 (–0.235–14.1)        | 30.1 (18.7–46.4)           |
| Slovenia                                                | 77.6 (63.4–94.6)              | 20.5 (–1.21–48.7)          | 98.2 (70–134)                 | 26.4 (–1.6–61.4)        | 9.07 (6.06–13.1)           | 2.4 (–0.132–6.08)        | 11.5 (6.93–17.9)           |
| <b>Eastern Europe</b>                                   | <b>7550 (6560–8660)</b>       | <b>2320 (1750–2990)</b>    | <b>9880 (8470–11500)</b>      | <b>30.8 (23.9–38.5)</b> | <b>886 (601–1240)</b>      | <b>272 (175–399)</b>     | <b>1160 (785–1620)</b>     |
| Belarus                                                 | 359 (291–442)                 | 92.1 (–10.9–224)           | 451 (322–621)                 | 25.6 (–3.1–60.0)        | 42.2 (27.8–60.7)           | 10.8 (–1.15–26.5)        | 53 (32.6–80.8)             |
| Estonia                                                 | 49.5 (40.2–60)                | 8.66 (–4.81–23.4)          | 58.1 (41.6–78.1)              | 17.6 (–9.8–49.6)        | 5.8 (3.87–8.41)            | 1.02 (–0.621–3)          | 6.82 (4.16–10.4)           |

|                                  |                            |                            |                            |                         |                         |                          |                          |
|----------------------------------|----------------------------|----------------------------|----------------------------|-------------------------|-------------------------|--------------------------|--------------------------|
| Latvia                           | 76.1 (61.9–91.8)           | 15.7 (–3.44–41)            | 91.8 (66.3–124)            | 20.7 (–4.7–54.5)        | 8.9 (5.91–12.7)         | 1.85 (–0.379–5.16)       | 10.8 (6.57–16.5)         |
| Lithuania                        | 129 (104–156)              | 37.3 (1.81–78.6)           | 166 (120–225)              | 29.0 (1.4–62.0)         | 15.1 (10–21.7)          | 4.36 (0.194–10.2)        | 19.4 (12–29.2)           |
| Republic of Moldova              | 154 (125–190)              | 58 (10.3–109)              | 212 (149–281)              | 37.8 (7.0–71.3)         | 18.2 (12.1–26.3)        | 6.87 (1.09–14.4)         | 25 (14.7–38.6)           |
| Russia                           | 5270 (4590–6040)           | 1680 (1390–2070)           | 6960 (6050–8000)           | 32.0 (26.9–37.3)        | 618 (419–870)           | 197 (132–283)            | 815 (557–1140)           |
| Ukraine                          | 1520 (1320–1750)           | 427 (12–927)               | 1940 (1470–2540)           | 28.2 (0.8–60.9)         | 177 (122–248)           | 50 (1.38–114)            | 227 (146–340)            |
| <b>High-income</b>               | <b>58200 (50100–67700)</b> | <b>14700 (11300–18200)</b> | <b>72900 (62800–85100)</b> | <b>25.2 (20.3–30.7)</b> | <b>6820 (4650–9540)</b> | <b>1720 (1130–2550)</b>  | <b>8540 (5830–12000)</b> |
| <b>Australasia</b>               | <b>1860 (1540–2270)</b>    | <b>203 (–159–633)</b>      | <b>2060 (1560–2710)</b>    | <b>10.9 (–8.7–34.8)</b> | <b>219 (146–315)</b>    | <b>24.2 (–18.4–83.1)</b> | <b>244 (154–365)</b>     |
| Australia                        | 1490 (1210–1840)           | 173 (–177–597)             | 1660 (1200–2250)           | 11.6 (–12.3–40.8)       | 175 (116–253)           | 20.6 (–19.8–77.6)        | 196 (122–304)            |
| New Zealand                      | 375 (322–437)              | 29.3 (–38.9–111)           | 404 (317–512)              | 7.9 (–10.7–30.4)        | 44.2 (29.6–61.2)        | 3.44 (–4.6–13.7)         | 47.7 (31.5–69.5)         |
| <b>High income Asia Pacific</b>  | <b>5170 (4430–6040)</b>    | <b>639 (128–1260)</b>      | <b>5810 (4830–6930)</b>    | <b>12.4 (2.4–23.9)</b>  | <b>615 (416–873)</b>    | <b>76.1 (15.1–162)</b>   | <b>691 (456–989)</b>     |
| Brunei                           | 13.7 (11–17.1)             | 1.39 (–2.05–5.54)          | 15.1 (10.7–21.3)           | 10.1 (–15.4–40.3)       | 1.67 (1.07–2.43)        | 0.167 (–0.261–0.71)      | 1.83 (1.08–2.82)         |
| Japan                            | 3130 (2740–3540)           | 396 (233–587)              | 3520 (3040–4060)           | 12.7 (7.6–18.5)         | 371 (253–518)           | 47 (22.6–79.3)           | 418 (280–590)            |
| Singapore                        | 170 (137–211)              | 30.7 (–13.5–85.2)          | 201 (145–272)              | 18.2 (–8.2–50.8)        | 20.5 (13.5–29.5)        | 3.71 (–1.76–11.1)        | 24.2 (14.6–37.3)         |
| South Korea                      | 1860 (1510–2300)           | 210 (–276–778)             | 2070 (1470–2810)           | 11.3 (–14.3–41.0)       | 223 (147–324)           | 25.2 (–33–95.5)          | 248 (151–377)            |
| <b>High income North America</b> | <b>21700 (18700–25200)</b> | <b>6020 (4550–7610)</b>    | <b>27700 (23700–32200)</b> | <b>27.8 (21.7–34.1)</b> | <b>2520 (1720–3520)</b> | <b>699 (445–1040)</b>    | <b>3220 (2190–4510)</b>  |
| Canada                           | 1670 (1350–2070)           | 348 (–85.7–913)            | 2010 (1460–2740)           | 20.9 (–5.1–52.5)        | 197 (129–285)           | 41 (–9.02–110)           | 238 (145–367)            |
| Greenland                        | 2.88 (2.28–3.59)           | 0.502 (–0.236–1.34)        | 3.38 (2.44–4.53)           | 17.5 (–7.3–47.9)        | 0.34 (0.222–0.493)      | 0.0594 (–0.0242–0.178)   | 0.399 (0.245–0.6)        |
| USA                              | 20000 (17300–23100)        | 5670 (4240–7220)           | 25700 (22000–29800)        | 28.4 (22.2–35.2)        | 2320 (1590–3230)        | 658 (420–971)            | 2980 (2040–4180)         |
| <b>Southern Latin America</b>    | <b>3600 (3170–4070)</b>    | <b>1320 (499–2180)</b>     | <b>4920 (3930–5990)</b>    | <b>36.8 (13.9–60.0)</b> | <b>428 (294–603)</b>    | <b>157 (56–289)</b>      | <b>585 (380–845)</b>     |
| Argentina                        | 2350 (2110–2580)           | 898 (170–1670)             | 3250 (2470–4140)           | 38.2 (7.2–70.9)         | 280 (194–392)           | 107 (20.5–220)           | 387 (245–582)            |
| Chile                            | 1060 (860–1310)            | 396 (75.1–780)             | 1460 (1080–1980)           | 37.4 (7.2–74.3)         | 125 (82.2–180)          | 46.7 (8.07–97.1)         | 172 (104–263)            |
| Uruguay                          | 186 (152–228)              | 30.5 (–19–82.6)            | 217 (156–293)              | 16.4 (–10.5–43.4)       | 22.1 (14.5–31.6)        | 3.63 (–2.24–10.6)        | 25.7 (15.4–39.5)         |
| <b>Western Europe</b>            | <b>25900 (21800–30600)</b> | <b>6470 (4210–9120)</b>    | <b>32400 (27100–38700)</b> | <b>25.0 (16.6–34.1)</b> | <b>3040 (2060–4260)</b> | <b>759 (435–1180)</b>    | <b>3800 (2560–5410)</b>  |
| Andorra                          | 4.94 (4.04–6.06)           | 1.65 (0.205–3.27)          | 6.59 (4.75–8.76)           | 33.4 (4.4–66.4)         | 0.583 (0.383–0.831)     | 0.193 (0.0206–0.416)     | 0.777 (0.491–1.16)       |
| Austria                          | 553 (452–676)              | 124 (–18.8–285)            | 677 (501–886)              | 22.5 (–3.1–51.5)        | 65.3 (44.1–93.7)        | 14.6 (–1.96–34)          | 79.9 (48.7–119)          |
| Belgium                          | 614 (499–745)              | 180 (–4.18–394)            | 794 (567–1050)             | 29.3 (–0.7–60.8)        | 72.2 (48–103)           | 21.2 (–0.512–48.2)       | 93.4 (58.7–144)          |
| Cyprus                           | 84.2 (68–103)              | 16 (–4.17–40.5)            | 100 (72.6–133)             | 18.9 (–5.0–46.6)        | 10 (6.61–14.4)          | 1.9 (–0.49–5.09)         | 11.9 (7.42–18.2)         |
| Denmark                          | 315 (258–382)              | 57.8 (–23.5–161)           | 373 (269–509)              | 18.3 (–7.5–51.0)        | 37.2 (24.6–53.4)        | 6.77 (–2.84–19.8)        | 43.9 (26.7–66.5)         |
| Finland                          | 232 (190–280)              | 26.1 (–29.6–94.9)          | 258 (182–347)              | 11.2 (–12.6–40.0)       | 27.3 (18–38.7)          | 3.07 (–3.59–12.2)        | 30.3 (19–46.4)           |
| France                           | 4380 (3590–5310)           | 1430 (217–2920)            | 5820 (4230–7780)           | 32.7 (5.0–68.9)         | 515 (344–731)           | 168 (24.4–382)           | 683 (430–1050)           |
| Germany                          | 5670 (4610–6860)           | 933 (–441–2650)            | 6600 (4890–8770)           | 16.5 (–8.0–46.7)        | 662 (438–943)           | 109 (–49.7–328)          | 771 (464–1150)           |
| Greece                           | 615 (501–740)              | 121 (–36.3–311)            | 735 (537–984)              | 19.7 (–6.0–50.1)        | 72.2 (48.1–103)         | 14.2 (–4.18–38.6)        | 86.4 (54.3–129)          |

|                                    |                            |                           |                            |                         |                         |                         |                         |
|------------------------------------|----------------------------|---------------------------|----------------------------|-------------------------|-------------------------|-------------------------|-------------------------|
| Iceland                            | 19.1 (15.5–23)             | 3.63 (–1.23–8.98)         | 22.7 (16.6–29.9)           | 19.1 (–6.7–47.5)        | 2.27 (1.5–3.23)         | 0.432 (–0.143–1.19)     | 2.7 (1.64–4.09)         |
| Ireland                            | 331 (268–402)              | 88.4 (–2.21–189)          | 419 (301–555)              | 26.7 (–0.7–57.6)        | 39.2 (26–56.1)          | 10.4 (–0.283–23.5)      | 49.6 (31.1–73.6)        |
| Israel                             | 360 (295–437)              | 99.6 (–0.556–230)         | 459 (334–626)              | 27.7 (–0.1–62.6)        | 43 (28.6–61.5)          | 11.9 (–0.0872–27.9)     | 54.9 (33.9–83.1)        |
| Italy                              | 3490 (3040–3970)           | 858 (552–1200)            | 4350 (3730–5000)           | 24.6 (16.0–33.8)        | 409 (278–575)           | 100 (60.6–161)          | 510 (345–714)           |
| Luxembourg                         | 35.7 (29–43.6)             | 9.85 (–0.0227–21.7)       | 45.6 (32.3–61.3)           | 27.5 (–0.1–57.8)        | 4.22 (2.78–6.03)        | 1.16 (–0.00292–2.59)    | 5.39 (3.24–8.16)        |
| Malta                              | 27.1 (22–33.1)             | 5.18 (–1.99–13.2)         | 32.3 (23.6–42.8)           | 19.2 (–6.9–48.1)        | 3.2 (2.13–4.6)          | 0.609 (–0.227–1.68)     | 3.81 (2.35–5.79)        |
| Monaco                             | 2.16 (1.77–2.62)           | 0.468 (–0.0873–1.12)      | 2.63 (1.9–3.46)            | 21.7 (–4.7–53.2)        | 0.254 (0.167–0.366)     | 0.0548 (–0.00984–0.134) | 0.308 (0.188–0.46)      |
| Netherlands                        | 1170 (951–1410)            | 317 (12.9–697)            | 1480 (1100–1960)           | 27.3 (1.0–58.4)         | 138 (92–197)            | 37.3 (1.43–86.1)        | 175 (111–260)           |
| Norway                             | 383 (333–437)              | 64.6 (29.6–101)           | 447 (384–524)              | 16.9 (7.8–25.9)         | 45.3 (31–63.5)          | 7.64 (3.22–13.4)        | 53 (35.9–73.9)          |
| Portugal                           | 877 (715–1070)             | 257 (24.9–543)            | 1130 (845–1490)            | 29.3 (3.1–62.0)         | 103 (68.2–147)          | 30.2 (3.29–68.3)        | 133 (82.3–206)          |
| San Marino                         | 1.92 (1.57–2.34)           | 0.621 (0.0346–1.31)       | 2.55 (1.84–3.39)           | 32.3 (1.7–67.7)         | 0.226 (0.151–0.32)      | 0.0726 (0.00363–0.158)  | 0.299 (0.186–0.44)      |
| Spain                              | 2330 (1900–2810)           | 723 (90.5–1540)           | 3050 (2230–4110)           | 31.1 (3.7–64.6)         | 274 (178–388)           | 85.2 (10.4–184)         | 359 (213–527)           |
| Sweden                             | 544 (476–619)              | 127 (7.25–272)            | 671 (533–832)              | 23.3 (1.4–50.9)         | 64.4 (43.5–89.9)        | 14.9 (0.726–34.5)       | 79.3 (50.4–116)         |
| Switzerland                        | 632 (518–765)              | 95.7 (–56.4–291)          | 728 (527–993)              | 15.1 (–9.2–44.9)        | 74.3 (49.7–106)         | 11.3 (–6.59–36.7)       | 85.6 (51.3–131)         |
| UK                                 | 3220 (2790–3670)           | 924 (767–1110)            | 4140 (3610–4760)           | 28.8 (24.6–33.0)        | 378 (258–529)           | 109 (71.6–157)          | 487 (329–680)           |
| <b>Latin America and Caribbean</b> | <b>33400 (28500–39500)</b> | <b>10600 (8360–13000)</b> | <b>44000 (37500–51500)</b> | <b>31.7 (25.8–37.7)</b> | <b>3970 (2680–5620)</b> | <b>1260 (836–1800)</b>  | <b>5230 (3540–7330)</b> |
| <b>Andean Latin America</b>        | <b>3410 (2740–4280)</b>    | <b>1770 (1050–2660)</b>   | <b>5180 (4050–6560)</b>    | <b>52.2 (30.7–75.6)</b> | <b>409 (267–595)</b>    | <b>212 (114–343)</b>    | <b>621 (403–925)</b>    |
| Bolivia                            | 624 (500–779)              | 316 (107–582)             | 940 (679–1270)             | 50.8 (17.8–91.4)        | 74.8 (48.8–109)         | 37.8 (12.6–76)          | 113 (69.9–171)          |
| Ecuador                            | 923 (739–1160)             | 445 (159–812)             | 1370 (991–1840)            | 48.3 (18.7–86.6)        | 111 (72.3–161)          | 53.3 (18.9–102)         | 164 (101–244)           |
| Peru                               | 1860 (1490–2330)           | 1010 (404–1730)           | 2870 (2100–3830)           | 54.5 (22.3–92.8)        | 223 (145–327)           | 121 (45.6–230)          | 345 (217–517)           |
| Caribbean                          | 2140 (1730–2620)           | 490 (209–815)             | 2630 (2100–3330)           | 23.0 (10.2–37.7)        | 254 (167–367)           | 58.4 (23.8–110)         | 313 (201–453)           |
| Antigua and Barbuda                | 4.2 (3.39–5.19)            | 0.903 (–0.216–2.25)       | 5.1 (3.67–6.9)             | 21.5 (–6.0–52.3)        | 0.5 (0.329–0.724)       | 0.108 (–0.0242–0.284)   | 0.608 (0.359–0.938)     |
| Bahamas                            | 18.1 (14.6–22.5)           | 6.89 (1.51–13.7)          | 25 (18.2–33.8)             | 38.1 (9.3–73.4)         | 2.16 (1.4–3.11)         | 0.819 (0.19–1.65)       | 2.98 (1.88–4.52)        |
| Barbados                           | 14.2 (11.4–17.5)           | 2.77 (–0.929–6.96)        | 17 (12.4–22.2)             | 19.6 (–6.5–52.7)        | 1.68 (1.11–2.43)        | 0.328 (–0.109–0.886)    | 2.01 (1.22–3.13)        |
| Belize                             | 18 (14.5–22.7)             | 6.98 (1.45–13.7)          | 25 (17.7–34.1)             | 38.8 (8.5–73.6)         | 2.16 (1.41–3.15)        | 0.835 (0.171–1.71)      | 3 (1.83–4.53)           |
| Bermuda                            | 3.07 (2.51–3.78)           | 0.654 (–0.154–1.65)       | 3.73 (2.7–5.06)            | 21.3 (–5.2–52.7)        | 0.364 (0.238–0.52)      | 0.0773 (–0.0174–0.207)  | 0.441 (0.264–0.67)      |
| Cuba                               | 532 (431–652)              | 103 (–38.1–288)           | 635 (460–876)              | 19.4 (–7.3–51.6)        | 62.8 (42–89.9)          | 12.3 (–4.19–35.6)       | 75.1 (46–116)           |
| Dominica                           | 3.12 (2.54–3.83)           | 0.641 (–0.194–1.71)       | 3.76 (2.73–5.14)           | 20.5 (–6.6–52.9)        | 0.371 (0.245–0.538)     | 0.0755 (–0.0245–0.207)  | 0.446 (0.272–0.682)     |
| Dominican Republic                 | 487 (392–606)              | 157 (18.1–324)            | 643 (459–867)              | 32.3 (3.5–66.7)         | 58.3 (37.9–85)          | 18.9 (2.11–41.6)        | 77.2 (45.7–120)         |
| Grenada                            | 4.68 (3.77–5.79)           | 0.896 (–0.405–2.36)       | 5.58 (3.93–7.57)           | 19.2 (–8.2–49.5)        | 0.558 (0.364–0.815)     | 0.107 (–0.0488–0.3)     | 0.665 (0.401–1.01)      |
| Guyana                             | 34.1 (27.3–42.3)           | 9.96 (0.684–22)           | 44 (31.6–60.7)             | 29.3 (2.2–63.2)         | 4.04 (2.66–5.89)        | 1.18 (0.0819–2.73)      | 5.22 (3.15–8)           |
| Haiti                              | 546 (436–683)              | 87.7 (–54.3–262)          | 634 (449–863)              | 16.2 (–10.1–47.8)       | 65 (42.5–94.8)          | 10.4 (–6.69–31.6)       | 75.4 (45.4–115)         |

|                                     |                            |                           |                            |                         |                         |                        |                         |
|-------------------------------------|----------------------------|---------------------------|----------------------------|-------------------------|-------------------------|------------------------|-------------------------|
| Jamaica                             | 125 (100–154)              | 25.4 (–6.54–62.9)         | 150 (108–203)              | 20.4 (–4.9–49.4)        | 14.9 (9.7–21.6)         | 3.05 (–0.812–8.14)     | 17.9 (10.7–27.9)        |
| Puerto Rico                         | 170 (138–208)              | 46.8 (–1.19–106)          | 217 (157–291)              | 27.6 (–0.8–60.5)        | 20 (13.1–28.9)          | 5.48 (–0.145–12.4)     | 25.5 (16–38.5)          |
| Saint Kitts and Nevis               | 2.79 (2.24–3.46)           | 0.564 (–0.182–1.43)       | 3.36 (2.42–4.54)           | 20.2 (–5.9–49.5)        | 0.332 (0.216–0.479)     | 0.0671 (–0.02–0.176)   | 0.399 (0.245–0.618)     |
| Saint Lucia                         | 8.32 (6.77–10.3)           | 1.68 (–0.482–4.36)        | 10 (7.29–13.4)             | 20.3 (–5.9–52.6)        | 0.985 (0.652–1.42)      | 0.199 (–0.0565–0.539)  | 1.18 (0.74–1.81)        |
| Saint Vincent and the Grenadines    | 5.18 (4.21–6.38)           | 0.962 (–0.391–2.68)       | 6.14 (4.41–8.37)           | 18.6 (–7.6–51.0)        | 0.615 (0.402–0.878)     | 0.114 (–0.0448–0.335)  | 0.729 (0.44–1.12)       |
| Suriname                            | 25.3 (20.6–31.3)           | 6.97 (–0.315–15.2)        | 32.3 (23.3–43.6)           | 27.5 (–1.2–58.9)        | 3 (1.96–4.36)           | 0.824 (–0.0351–2.03)   | 3.83 (2.32–5.89)        |
| Trinidad and Tobago                 | 61 (49–74.9)               | 13.2 (–3.36–34.3)         | 74.2 (53.3–103)            | 21.6 (–5.7–54.5)        | 7.21 (4.71–10.5)        | 1.57 (–0.377–4.29)     | 8.77 (5.26–13.5)        |
| Virgin Islands                      | 4.79 (3.88–5.88)           | 0.632 (–0.585–2.17)       | 5.42 (3.89–7.44)           | 13.2 (–12.4–44.6)       | 0.563 (0.375–0.809)     | 0.074 (–0.0692–0.266)  | 0.637 (0.395–0.98)      |
| <b>Central Latin America</b>        | <b>10100 (8520–12000)</b>  | <b>3790 (2740–4930)</b>   | <b>13900 (11500–16600)</b> | <b>37.5 (28.3–47.0)</b> | <b>1210 (810–1720)</b>  | <b>453 (287–683)</b>   | <b>1660 (1110–2380)</b> |
| Colombia                            | 2330 (1860–2870)           | 822 (148–1600)            | 3150 (2300–4150)           | 35.4 (6.6–68.8)         | 279 (181–399)           | 98.6 (14.7–202)        | 377 (234–575)           |
| Costa Rica                          | 208 (168–259)              | 73.7 (8.51–148)           | 281 (202–385)              | 35.6 (4.4–70.9)         | 24.8 (16.2–35.9)        | 8.76 (1.03–18.6)       | 33.5 (20.4–51.1)        |
| El Salvador                         | 273 (220–343)              | 69.7 (–7.56–164)          | 343 (240–464)              | 25.6 (–2.6–57.7)        | 32.7 (21.5–47.2)        | 8.35 (–0.85–20.3)      | 41.1 (24.8–62)          |
| Guatemala                           | 647 (521–821)              | 256 (58.8–511)            | 903 (636–1250)             | 39.4 (9.2–75.4)         | 77.4 (50–113)           | 30.5 (6.66–64.2)       | 108 (67–167)            |
| Honduras                            | 400 (319–499)              | 185 (48.3–349)            | 585 (413–798)              | 46.4 (13.3–85.6)        | 48.1 (31–69.7)          | 22.4 (6.11–46.2)       | 70.5 (40.6–110)         |
| Mexico                              | 4640 (3970–5370)           | 1840 (1440–2300)          | 6490 (5530–7550)           | 39.8 (32.8–48.0)        | 554 (374–782)           | 220 (144–317)          | 774 (526–1090)          |
| Nicaragua                           | 279 (227–351)              | 71.5 (–8.68–175)          | 351 (241–493)              | 25.5 (–3.5–59.5)        | 33.5 (21.9–48.7)        | 8.6 (–0.902–21.8)      | 42.1 (25.2–66.4)        |
| Panama                              | 164 (133–203)              | 92.1 (34.6–167)           | 256 (186–349)              | 56.2 (21.6–95.7)        | 19.7 (12.9–28.4)        | 11 (3.89–21.1)         | 30.7 (18.7–45.9)        |
| Venezuela                           | 1180 (952–1460)            | 377 (39.5–821)            | 1560 (1120–2090)           | 32.0 (3.3–66.0)         | 141 (92.7–206)          | 45.2 (4.49–101)        | 187 (116–284)           |
| <b>Tropical Latin America</b>       | <b>17800 (15300–20600)</b> | <b>4520 (3080–6060)</b>   | <b>22300 (19100–26000)</b> | <b>25.5 (17.9–33.7)</b> | <b>2100 (1420–2940)</b> | <b>533 (317–821)</b>   | <b>2630 (1790–3670)</b> |
| Brazil                              | 17300 (15000–20000)        | 4380 (2960–5870)          | 21700 (18600–25200)        | 25.4 (17.7–33.9)        | 2040 (1380–2860)        | 516 (306–788)          | 2550 (1740–3560)        |
| Paraguay                            | 488 (392–604)              | 148 (7.63–305)            | 635 (466–853)              | 30.3 (1.6–62.1)         | 58.2 (37.9–84.6)        | 17.6 (1–39.7)          | 75.9 (48.3–118)         |
| <b>North Africa and Middle East</b> | <b>32100 (26300–39300)</b> | <b>10400 (7350–14100)</b> | <b>42500 (34700–52400)</b> | <b>32.4 (24.9–41.1)</b> | <b>3850 (2550–5510)</b> | <b>1240 (777–1900)</b> | <b>5090 (3390–7280)</b> |
| Afghanistan                         | 1820 (1420–2290)           | 524 (1.14–1180)           | 2340 (1640–3300)           | 28.8 (0.1–61.4)         | 219 (139–325)           | 62.4 (0.0693–146)      | 281 (172–435)           |
| Algeria                             | 2140 (1720–2650)           | 520 (–78.5–1220)          | 2660 (1920–3570)           | 24.4 (–3.6–58.3)        | 256 (167–373)           | 62.5 (–8.84–156)       | 319 (189–478)           |
| Bahrain                             | 76.8 (60.8–95.2)           | 20.6 (–1.7–46.8)          | 97.3 (67.1–131)            | 26.8 (–2.2–58.3)        | 9.19 (5.97–13.2)        | 2.45 (–0.229–5.89)     | 11.6 (7.01–17.7)        |
| Egypt                               | 4490 (3590–5630)           | 1670 (277–3520)           | 6160 (4350–8540)           | 37.2 (7.1–73.7)         | 541 (353–795)           | 201 (37–428)           | 742 (451–1140)          |
| Iran                                | 6090 (5230–7020)           | 2380 (1830–3000)          | 8470 (7270–9900)           | 39.2 (31.4–47.6)        | 723 (490–1010)          | 283 (182–421)          | 1010 (682–1420)         |
| Iraq                                | 2330 (1850–2920)           | 792 (118–1640)            | 3130 (2230–4260)           | 34.0 (4.7–69.3)         | 281 (179–412)           | 94.7 (14.6–195)        | 375 (229–570)           |
| Jordan                              | 615 (494–768)              | 136 (–40.5–341)           | 751 (531–1050)             | 22.0 (–6.4–53.4)        | 74.4 (47.9–108)         | 16.5 (–4.04–43.8)      | 90.8 (54.6–142)         |
| Kuwait                              | 237 (186–298)              | 74.3 (7.2–157)            | 311 (221–426)              | 31.4 (2.7–64.2)         | 28.3 (18.5–41.4)        | 8.9 (0.815–20.7)       | 37.2 (22.5–55.9)        |
| Lebanon                             | 351 (283–433)              | 90.8 (–1.96–208)          | 442 (318–592)              | 25.9 (–0.7–57.8)        | 41.7 (27–60.4)          | 10.7 (–0.256–25)       | 52.5 (32.4–78.8)        |

|                                               |                            |                            |                            |                         |                          |                           |                          |
|-----------------------------------------------|----------------------------|----------------------------|----------------------------|-------------------------|--------------------------|---------------------------|--------------------------|
| Libya                                         | 384 (309–474)              | 103 (–0.655–235)           | 488 (354–664)              | 26.9 (–0.2–58.1)        | 46 (29.6–66.6)           | 12.4 (–0.182–29.2)        | 58.3 (34.5–88.4)         |
| Morocco                                       | 1850 (1490–2290)           | 659 (95.3–1280)            | 2510 (1780–3400)           | 35.6 (5.4–67.4)         | 221 (142–320)            | 78.5 (10.5–165)           | 300 (182–452)            |
| Oman                                          | 234 (182–295)              | 45.9 (–19–119)             | 280 (196–385)              | 19.7 (–7.3–48.6)        | 28.3 (18–41.4)           | 5.55 (–2.05–14.9)         | 33.8 (20.2–53)           |
| Palestine                                     | 267 (211–336)              | 95 (13.8–191)              | 362 (252–495)              | 35.6 (5.3–73.3)         | 32.1 (20.4–46.5)         | 11.5 (1.51–25.9)          | 43.6 (26.2–67.3)         |
| Qatar                                         | 141 (110–179)              | 43.9 (3.29–92.2)           | 185 (126–255)              | 31.1 (2.3–65.2)         | 17 (10.8–24.6)           | 5.28 (0.458–11.6)         | 22.3 (13.1–33.6)         |
| Saudi Arabia                                  | 1870 (1480–2360)           | 642 (86.9–1350)            | 2510 (1760–3490)           | 34.3 (4.9–68.7)         | 224 (144–331)            | 77.1 (10.1–173)           | 301 (182–471)            |
| Sudan                                         | 2020 (1610–2560)           | 584 (25.9–1320)            | 2610 (1860–3640)           | 28.9 (1.6–64.3)         | 244 (156–358)            | 69.9 (3.29–163)           | 314 (189–486)            |
| Syria                                         | 811 (654–1010)             | 169 (–39–434)              | 980 (692–1340)             | 20.8 (–4.7–52.1)        | 96.7 (62.2–139)          | 20.1 (–4.76–53.8)         | 117 (71–184)             |
| Tunisia                                       | 615 (498–758)              | 183 (1.61–399)             | 799 (566–1080)             | 29.8 (0.3–64.7)         | 73.3 (47.7–106)          | 21.8 (0.206–49.4)         | 95.1 (58.4–146)          |
| Turkey                                        | 3800 (3090–4680)           | 1330 (212–2770)            | 5130 (3630–6910)           | 35.1 (5.5–71.2)         | 454 (298–649)            | 158 (24.6–339)            | 612 (384–902)            |
| United Arab Emirates                          | 437 (341–556)              | 105 (–11.7–258)            | 542 (379–761)              | 24.0 (–2.4–56.3)        | 52.4 (33.7–76.7)         | 12.6 (–1.46–31.7)         | 65 (38.2–101)            |
| Yemen                                         | 1530 (1200–1940)           | 215 (–165–674)             | 1750 (1250–2380)           | 14.1 (–10.8–43.8)       | 183 (119–267)            | 25.7 (–21.2–84.5)         | 209 (125–317)            |
| <b>South Asia</b>                             | <b>55000 (47200–64400)</b> | <b>19300 (14800–24000)</b> | <b>74300 (63000–87200)</b> | <b>35.1 (28.2–42.0)</b> | <b>6530 (4440–9160)</b>  | <b>2280 (1480–3300)</b>   | <b>8810 (5990–12400)</b> |
| Bangladesh                                    | 5130 (4110–6470)           | 1860 (222–3880)            | 6990 (4880–9620)           | 36.2 (4.6–75.3)         | 612 (400–889)            | 221 (24–506)              | 833 (502–1280)           |
| Bhutan                                        | 24.7 (19.9–31)             | 3.89 (–2.89–11.5)          | 28.6 (19.8–38.9)           | 15.8 (–11.4–46.8)       | 2.95 (1.92–4.34)         | 0.463 (–0.305–1.46)       | 3.41 (2.02–5.33)         |
| India                                         | 42200 (36300–48900)        | 14700 (11400–18300)        | 56900 (48300–66300)        | 34.8 (28.5–41.5)        | 4990 (3400–7010)         | 1740 (1140–2520)          | 6730 (4580–9450)         |
| Nepal                                         | 966 (776–1220)             | 353 (49.3–691)             | 1320 (930–1780)            | 36.6 (4.8–71.5)         | 115 (74.9–168)           | 41.7 (5.66–85.5)          | 156 (97.1–238)           |
| Pakistan                                      | 6730 (5760–7870)           | 2380 (1200–3880)           | 9110 (7310–11100)          | 35.4 (18.0–55.7)        | 803 (544–1130)           | 284 (124–503)             | 1090 (722–1570)          |
| <b>Southeast Asia, east Asia, and Oceania</b> | <b>72500 (62500–83800)</b> | <b>10000 (6610–13600)</b>  | <b>82500 (70700–96400)</b> | <b>13.8 (9.3–18.3)</b>  | <b>8690 (5850–12300)</b> | <b>1200 (685–1830)</b>    | <b>9890 (6630–14000)</b> |
| <b>East Asia</b>                              | <b>48100 (41700–55000)</b> | <b>5270 (2500–8080)</b>    | <b>53400 (46000–61700)</b> | <b>11.0 (5.1–16.9)</b>  | <b>5750 (3880–8120)</b>  | <b>630 (259–1080)</b>     | <b>6380 (4340–9010)</b>  |
| China                                         | 46200 (40100–52800)        | 5160 (2460–7980)           | 51300 (44300–59300)        | 11.2 (5.3–17.3)         | 5520 (3720–7800)         | 617 (259–1050)            | 6140 (4160–8680)         |
| North Korea                                   | 979 (795–1190)             | 67.9 (–184–367)            | 1050 (753–1430)            | 6.9 (–17.9–36.7)        | 118 (77.1–170)           | 8.02 (–23.3–46.7)         | 126 (76.8–202)           |
| Taiwan (province of China)                    | 922 (753–1120)             | 42.9 (–189–289)            | 965 (693–1290)             | 4.7 (–19.6–32.7)        | 110 (72.1–157)           | 5.17 (–23.6–36.6)         | 115 (67.5–176)           |
| <b>Oceania</b>                                | <b>472 (377–593)</b>       | <b>5.69 (–77.1–112)</b>    | <b>478 (354–640)</b>       | <b>1.2 (–16.7–22.9)</b> | <b>57 (36.3–83.2)</b>    | <b>0.684 (–9.83–13.1)</b> | <b>57.7 (35.7–87.1)</b>  |
| American Samoa                                | 2.09 (1.7–2.59)            | 0.182 (–0.331–0.765)       | 2.27 (1.64–3.11)           | 8.7 (–15.4–37.0)        | 0.25 (0.164–0.36)        | 0.0218 (–0.0405–0.0943)   | 0.271 (0.166–0.416)      |
| Cook Islands                                  | 0.715 (0.584–0.869)        | 0.0624 (–0.107–0.273)      | 0.778 (0.565–1.04)         | 8.8 (–15.1–37.1)        | 0.0847 (0.0556–0.123)    | 0.00738 (–0.0132–0.0335)  | 0.0921 (0.0571–0.142)    |
| Federated States of Micronesia                | 3.85 (3.11–4.73)           | 0.12 (–0.727–1.31)         | 3.97 (2.78–5.41)           | 3.1 (–18.9–34.1)        | 0.463 (0.298–0.673)      | 0.0142 (–0.0909–0.155)    | 0.478 (0.292–0.735)      |
| Fiji                                          | 34.3 (27.7–42)             | 2.61 (–5.68–12.5)          | 36.9 (26.5–50.2)           | 7.7 (–16.7–36.5)        | 4.11 (2.67–5.91)         | 0.313 (–0.723–1.61)       | 4.43 (2.75–6.89)         |
| Guam                                          | 6.44 (5.25–7.85)           | 1.49 (–0.416–3.74)         | 7.92 (5.52–10.7)           | 23.2 (–6.5–56.1)        | 0.772 (0.507–1.12)       | 0.179 (–0.0501–0.477)     | 0.951 (0.579–1.48)       |
| Kiribati                                      | 4.32 (3.45–5.37)           | 0.203 (–0.782–1.4)         | 4.52 (3.22–6.15)           | 4.7 (–18.0–30.9)        | 0.52 (0.332–0.751)       | 0.0247 (–0.0991–0.179)    | 0.545 (0.329–0.855)      |
| Marshall Islands                              | 2.07 (1.65–2.59)           | 0.0707 (–0.434–0.672)      | 2.14 (1.51–2.95)           | 3.4 (–20.7–30.6)        | 0.249 (0.161–0.36)       | 0.00861 (–0.0522–0.0842)  | 0.257 (0.15–0.404)       |



|                                   |                            |                          |                            |                         |                           |                              |                          |
|-----------------------------------|----------------------------|--------------------------|----------------------------|-------------------------|---------------------------|------------------------------|--------------------------|
| Nauru                             | 0.389 (0.311–0.486)        | 0.0379 (–0.0575–0.158)   | 0.427 (0.296–0.603)        | 9.7 (–14.5–39.2)        | 0.0469 (0.0298–0.0685)    | 0.00454 (–0.00715–0.0198)    | 0.0515 (0.0315–0.0802)   |
| Niue                              | 0.0657 (0.0535–0.0801)     | 0.00562 (–0.0104–0.0243) | 0.0713 (0.0515–0.0978)     | 8.5 (–15.2–36.3)        | 0.00779 (0.00515–0.0112)  | 0.000659 (–0.00131–0.00294)  | 0.00845 (0.00536–0.0129) |
| Northern Mariana Islands          | 1.71 (1.38–2.09)           | 0.343 (–0.0898–0.931)    | 2.05 (1.49–2.81)           | 20.1 (–5.9–53.9)        | 0.204 (0.134–0.296)       | 0.041 (–0.0105–0.115)        | 0.245 (0.152–0.377)      |
| Palau                             | 0.717 (0.577–0.877)        | 0.0543 (–0.114–0.259)    | 0.772 (0.558–1.05)         | 7.6 (–15.7–35.6)        | 0.085 (0.0563–0.123)      | 0.0064 (–0.0138–0.032)       | 0.0914 (0.0575–0.138)    |
| Papua New Guinea                  | 348 (275–437)              | –0.666 (–80.1–93.8)      | 347 (247–482)              | –0.3 (–23.1–27.2)       | 42 (26.6–61.2)            | –0.087 (–10.3–11.8)          | 41.9 (25.5–64.5)         |
| Samoa                             | 7.52 (6.11–9.32)           | 0.166 (–1.57–2.39)       | 7.68 (5.44–10.7)           | 2.2 (–20.9–30.7)        | 0.907 (0.592–1.31)        | 0.0191 (–0.204–0.28)         | 0.926 (0.555–1.41)       |
| Solomon Islands                   | 23.3 (18.5–29.1)           | 0.248 (–5.1–5.88)        | 23.5 (16.7–32.2)           | 1.1 (–22.1–26.0)        | 2.81 (1.83–4.12)          | 0.0308 (–0.616–0.759)        | 2.84 (1.76–4.43)         |
| Tokelau                           | 0.052 (0.0424–0.0641)      | 0.0053 (–0.00762–0.0197) | 0.0573 (0.0406–0.076)      | 10.3 (–14.6–38.8)       | 0.00622 (0.00412–0.00899) | 0.000635 (–0.000913–0.00249) | 0.00685 (0.00419–0.0104) |
| Tonga                             | 3.73 (3–4.59)              | 0.347 (–0.576–1.46)      | 4.08 (2.88–5.5)            | 9.3 (–15.4–40.0)        | 0.45 (0.291–0.658)        | 0.0426 (–0.0702–0.186)       | 0.492 (0.299–0.77)       |
| Tuvalu                            | 0.453 (0.365–0.558)        | 0.0418 (–0.0654–0.178)   | 0.495 (0.353–0.677)        | 9.2 (–14.9–37.8)        | 0.0544 (0.0355–0.0787)    | 0.00505 (–0.00861–0.0232)    | 0.0595 (0.0359–0.0926)   |
| Vanuatu                           | 10.6 (8.45–13.2)           | 0.108 (–2.21–2.92)       | 10.7 (7.65–14.7)           | 1.1 (–21.1–28.0)        | 1.28 (0.822–1.85)         | 0.014 (–0.272–0.36)          | 1.3 (0.788–1.99)         |
| <b>Southeast Asia</b>             | <b>24000 (20300–28200)</b> | <b>4760 (3110–6640)</b>  | <b>28700 (24200–34100)</b> | <b>19.9 (13.5–26.7)</b> | <b>2880 (1930–4090)</b>   | <b>572 (321–884)</b>         | <b>3450 (2280–4930)</b>  |
| Cambodia                          | 649 (526–805)              | 77.7 (–79.2–280)         | 727 (515–992)              | 12.0 (–12.0–42.2)       | 78 (50.8–113)             | 9.43 (–9.5–35)               | 87.5 (54.9–137)          |
| Indonesia                         | 9360 (8050–10800)          | 1900 (1090–2870)         | 11300 (9560–13300)         | 20.3 (12.2–29.0)        | 1130 (758–1580)           | 229 (113–374)                | 1360 (911–1920)          |
| Laos                              | 312 (257–383)              | 44.3 (–32.5–136)         | 357 (263–474)              | 14.2 (–10.5–44.3)       | 37.8 (24.8–55.2)          | 5.31 (–4.08–16.6)            | 43.1 (27.3–64.8)         |
| Malaysia                          | 1410 (1120–1760)           | 195 (–145–633)           | 1600 (1150–2250)           | 13.9 (–11.0–43.9)       | 169 (110–246)             | 23.4 (–16.8–81.1)            | 192 (114–293)            |
| Maldives                          | 17.8 (14.1–22.7)           | 4.29 (–0.54–10.7)        | 22 (15.8–30.7)             | 24.2 (–3.0–57.1)        | 2.15 (1.38–3.13)          | 0.517 (–0.0724–1.31)         | 2.66 (1.63–4.1)          |
| Mauritius                         | 50.4 (41.1–62.1)           | 7.59 (–5.18–23.1)        | 58 (42.2–79.4)             | 15.1 (–10.3–45.0)       | 5.95 (3.9–8.57)           | 0.893 (–0.557–2.8)           | 6.84 (4.21–10.7)         |
| Myanmar                           | 2040 (1640–2490)           | 549 (–32.1–1230)         | 2590 (1880–3540)           | 26.9 (–1.5–60.0)        | 245 (158–352)             | 66 (–4.27–157)               | 311 (183–479)            |
| Philippines                       | 4270 (3660–4930)           | 1430 (1140–1780)         | 5700 (4880–6640)           | 33.6 (27.8–40.0)        | 514 (347–724)             | 173 (113–253)                | 687 (464–968)            |
| Seychelles                        | 3.83 (3.09–4.72)           | 0.679 (–0.313–1.9)       | 4.5 (3.22–6.11)            | 17.8 (–7.7–47.9)        | 0.458 (0.301–0.66)        | 0.0813 (–0.0344–0.239)       | 0.539 (0.322–0.828)      |
| Sri Lanka                         | 859 (706–1050)             | 165 (–60.8–444)          | 1020 (730–1390)            | 19.1 (–7.1–51.2)        | 102 (66.9–148)            | 19.5 (–7.59–55.8)            | 122 (72.9–187)           |
| Thailand                          | 2670 (2150–3300)           | 213 (–457–1030)          | 2880 (2020–3940)           | 7.9 (–17.0–37.5)        | 317 (208–457)             | 25.2 (–56.9–121)             | 342 (206–513)            |
| Timor–Leste                       | 43.8 (35.1–54.5)           | 6.78 (–5.20.2)           | 50.6 (36.1–67.5)           | 15.6 (–11.8–44.9)       | 5.3 (3.42–7.76)           | 0.826 (–0.595–2.62)          | 6.12 (3.68–9.7)          |
| Vietnam                           | 2240 (1800–2770)           | 155 (–380–815)           | 2400 (1690–3270)           | 6.9 (–17.2–34.5)        | 270 (178–390)             | 18.8 (–45.5–101)             | 289 (175–448)            |
| <b>Sub-Saharan Africa</b>         | <b>33100 (27200–40400)</b> | <b>7100 (5280–9140)</b>  | <b>40200 (32900–49300)</b> | <b>21.5 (17.1–25.7)</b> | <b>3990 (2620–5720)</b>   | <b>854 (551–1280)</b>        | <b>4840 (3180–6980)</b>  |
| <b>Central sub-Saharan Africa</b> | <b>4200 (3350–5320)</b>    | <b>821 (10.6–1760)</b>   | <b>5030 (3770–6630)</b>    | <b>19.6 (0.3–41.5)</b>  | <b>505 (325–731)</b>      | <b>98.5 (0.921–224)</b>      | <b>603 (378–901)</b>     |
| Angola                            | 963 (760–1230)             | 191 (–52.4–507)          | 1150 (817–1580)            | 19.9 (–5.6–52.1)        | 116 (73.7–169)            | 23 (–5.96–62.7)              | 139 (82.6–210)           |
| Central African Republic          | 187 (148–237)              | 28.8 (–19.5–87.2)        | 216 (155–300)              | 15.5 (–11.0–44.0)       | 22.3 (14.3–32.5)          | 3.45 (–2.26–10.6)            | 25.8 (15.3–39.2)         |
| Congo                             | 177 (141–222)              | 38 (–9.09–95.7)          | 215 (153–298)              | 21.4 (–4.9–52.6)        | 21.2 (13.6–31.1)          | 4.54 (–1.09–12.5)            | 25.8 (15.4–39.6)         |
| Democratic Republic of the        | 2770 (2190–3510)           | 544 (–193–1390)          | 3310 (2370–4460)           | 19.7 (–7.0–50.7)        | 332 (212–480)             | 65.1 (–21.6–177)             | 397 (242–620)            |

|                                    |                            |                         |                            |                         |                         |                       |                         |
|------------------------------------|----------------------------|-------------------------|----------------------------|-------------------------|-------------------------|-----------------------|-------------------------|
| Congo                              |                            |                         |                            |                         |                         |                       |                         |
| Equatorial Guinea                  | 49 (38.5–63.3)             | 9.33 (–3.8–25.4)        | 58.3 (40.5–81.4)           | 19.0 (–7.9–48.4)        | 5.9 (3.75–8.57)         | 1.12 (–0.49–3.13)     | 7.02 (4.18–10.7)        |
| Gabon                              | 62.4 (49.5–78.7)           | 10.7 (–5.97–30.2)       | 73.1 (51.6–101)            | 17.1 (–9.4–47.0)        | 7.46 (4.78–10.7)        | 1.28 (–0.685–3.57)    | 8.74 (5.07–13.3)        |
| <b>Eastern sub-Saharan Africa</b>  | <b>13300 (10900–16500)</b> | <b>2500 (1530–3630)</b> | <b>15800 (12900–19600)</b> | <b>18.8 (11.9–26.3)</b> | <b>1610 (1050–2320)</b> | <b>301 (163–500)</b>  | <b>1910 (1260–2760)</b> |
| Burundi                            | 373 (295–475)              | 38 (–55.4–151)          | 411 (295–575)              | 10.2 (–15.3–38.8)       | 44.9 (28.7–65.5)        | 4.53 (–7.32–18.3)     | 49.4 (30.1–77.1)        |
| Comoros                            | 24.9 (19.8–31.5)           | 5.01 (–1.57–13.4)       | 29.9 (20.8–41.2)           | 20.1 (–6.2–52.5)        | 3.01 (1.92–4.38)        | 0.604 (–0.181–1.69)   | 3.61 (2.16–5.63)        |
| Djibouti                           | 40 (31.5–50.7)             | 6.91 (–3.9–19.5)        | 46.9 (32.8–64.4)           | 17.3 (–10.1–47.9)       | 4.84 (3.11–7.02)        | 0.834 (–0.47–2.5)     | 5.67 (3.4–9.08)         |
| Eritrea                            | 217 (171–275)              | 23.6 (–29.1–86.6)       | 240 (168–339)              | 10.9 (–13.4–39.6)       | 26.1 (16.7–38.2)        | 2.85 (–3.3–11.1)      | 29 (17.5–45.3)          |
| Ethiopia                           | 3390 (2880–4000)           | 659 (215–1160)          | 4050 (3270–4960)           | 19.4 (6.2–32.9)         | 411 (275–587)           | 79.8 (24–153)         | 491 (328–699)           |
| Kenya                              | 1590 (1350–1870)           | 485 (377–603)           | 2070 (1760–2430)           | 30.6 (25.0–36.5)        | 192 (129–272)           | 58.6 (37.4–85.1)      | 250 (168–354)           |
| Madagascar                         | 945 (744–1210)             | 171 (–62.8–463)         | 1120 (780–1540)            | 18.1 (–7.1–46.5)        | 114 (72.6–168)          | 20.6 (–7.7–58.6)      | 135 (82.1–211)          |
| Malawi                             | 621 (491–794)              | 115 (–43.8–317)         | 736 (513–1000)             | 18.5 (–7.1–49.8)        | 75.1 (47.9–110)         | 13.7 (–5.02–38.5)     | 88.8 (52.5–136)         |
| Mozambique                         | 957 (756–1220)             | 146 (–93.7–447)         | 1100 (759–1520)            | 15.2 (–10.1–46.8)       | 114 (72.8–165)          | 17.5 (–10.8–55.5)     | 131 (79.3–203)          |
| Rwanda                             | 431 (343–550)              | 72 (–42.9–222)          | 503 (349–701)              | 16.6 (–10.0–47.5)       | 51.9 (33.3–75.8)        | 8.6 (–5.42–26.7)      | 60.5 (36.2–93.2)        |
| Somalia                            | 590 (464–748)              | 95.5 (–54–271)          | 685 (465–951)              | 16.2 (–10.5–47.1)       | 71.2 (45.1–106)         | 11.5 (–7.17–34.9)     | 82.8 (49.1–129)         |
| South Sudan                        | 347 (274–438)              | 49.5 (–37.6–154)        | 396 (279–545)              | 14.3 (–11.3–42.3)       | 41.6 (26.7–61)          | 5.88 (–4.62–19.2)     | 47.5 (28.5–72.4)        |
| Uganda                             | 1320 (1030–1690)           | 279 (–65–728)           | 1600 (1100–2200)           | 21.2 (–4.9–51.7)        | 159 (101–236)           | 33.5 (–8.27–92.5)     | 193 (119–307)           |
| Tanzania                           | 1850 (1480–2370)           | 291 (–166–875)          | 2150 (1490–2990)           | 15.6 (–8.9–45.4)        | 224 (143–325)           | 35.2 (–20.8–109)      | 259 (157–409)           |
| Zambia                             | 625 (492–797)              | 62.8 (–87.9–251)        | 688 (495–972)              | 10.0 (–14.2–38.2)       | 75.2 (48.1–111)         | 7.43 (–10.1–30.7)     | 82.7 (50.7–127)         |
| <b>Southern sub-Saharan Africa</b> | <b>2870 (2420–3410)</b>    | <b>1000 (684–1380)</b>  | <b>3870 (3230–4670)</b>    | <b>35.0 (24.5–46.4)</b> | <b>340 (228–480)</b>    | <b>119 (73.7–187)</b> | <b>459 (311–654)</b>    |
| Botswana                           | 83.6 (66.7–106)            | 9.4 (–12–34)            | 93 (66–130)                | 11.3 (–14.0–39.6)       | 9.97 (6.41–14.4)        | 1.12 (–1.4–4.22)      | 11.1 (6.65–17.4)        |
| Eswatini                           | 38.5 (30.8–48.6)           | 12.2 (1.43–26.3)        | 50.7 (36–70.3)             | 31.7 (4.3–65.9)         | 4.59 (2.91–6.69)        | 1.45 (0.158–3.27)     | 6.04 (3.6–9.3)          |
| Lesotho                            | 64.3 (51.2–80.8)           | 15 (–2.95–36)           | 79.3 (55.7–109)            | 23.4 (–4.1–57.1)        | 7.64 (4.89–11)          | 1.79 (–0.334–4.61)    | 9.42 (5.69–14.6)        |
| Namibia                            | 82 (65.1–103)              | 23.6 (–0.0725–54.2)     | 106 (74.9–146)             | 28.7 (–0.1–63.6)        | 9.85 (6.43–14.3)        | 2.82 (–0.00936–6.67)  | 12.7 (7.8–19.8)         |
| South Africa                       | 2150 (1830–2490)           | 856 (578–1180)          | 3010 (2500–3570)           | 39.9 (26.9–53.8)        | 254 (171–355)           | 101 (61.7–160)        | 355 (244–509)           |
| Zimbabwe                           | 453 (357–576)              | 86.1 (–30.1–234)        | 539 (381–742)              | 19.1 (–6.6–50.4)        | 54.5 (34.9–79.2)        | 10.4 (–3.5–29.8)      | 64.9 (38.8–102)         |
| <b>Western sub-Saharan Africa</b>  | <b>12700 (10400–15400)</b> | <b>2770 (2040–3610)</b> | <b>15400 (12600–18800)</b> | <b>21.9 (17.0–27.5)</b> | <b>1530 (999–2210)</b>  | <b>336 (204–523)</b>  | <b>1870 (1230–2730)</b> |
| Benin                              | 352 (276–449)              | 34.4 (–54.7–133)        | 387 (270–539)              | 9.8 (–15.4–37.7)        | 42.8 (27–63.1)          | 4.25 (–6.4–17.9)      | 47 (28.4–73.9)          |
| Burkina Faso                       | 620 (482–787)              | 71.8 (–84–284)          | 691 (465–993)              | 11.4 (–14.4–44.4)       | 75.1 (47.2–110)         | 8.68 (–10.5–34.3)     | 83.8 (48.3–136)         |
| Cabo Verde                         | 17 (13.6–21.3)             | 8.1 (2.35–16)           | 25.1 (18.1–35.3)           | 47.7 (13.5–89.8)        | 2.06 (1.33–2.96)        | 0.973 (0.256–1.98)    | 3.03 (1.84–4.55)        |
| Cameroon                           | 859 (670–1100)             | 95.3 (–123–354)         | 954 (665–1340)             | 11.1 (–13.9–42.3)       | 104 (65.2–156)          | 11.6 (–14.9–45.9)     | 116 (67.5–180)          |

|                       |                  |                    |                  |                   |                    |                      |                    |
|-----------------------|------------------|--------------------|------------------|-------------------|--------------------|----------------------|--------------------|
| Chad                  | 445 (347–569)    | 62.5 (–49.1–208)   | 507 (352–710)    | 14.0 (–11.7–48.8) | 54 (34.5–79.3)     | 7.59 (–6.34–26.6)    | 61.5 (36.1–96.4)   |
| Côte d’Ivoire         | 748 (590–951)    | 91.5 (–95.5–336)   | 840 (584–1170)   | 12.3 (–13.4–45.1) | 90.6 (57.4–134)    | 11.2 (–11.2–42.7)    | 102 (62.6–159)     |
| The Gambia            | 66.5 (52.3–84.3) | 11.8 (–6.59–34.3)  | 78.3 (53.8–110)  | 17.7 (–10.0–49.4) | 8.04 (5.06–11.8)   | 1.43 (–0.759–4.5)    | 9.47 (5.37–15.1)   |
| Ghana                 | 910 (718–1150)   | 149 (–96.2–462)    | 1060 (749–1480)  | 16.5 (–10.8–50.1) | 110 (70.5–160)     | 18.2 (–10.6–59.4)    | 128 (73.9–203)     |
| Guinea                | 358 (283–462)    | 59.9 (–33.3–179)   | 418 (286–585)    | 16.7 (–8.8–46.9)  | 43.4 (27.3–63.3)   | 7.24 (–3.95–22.2)    | 50.6 (29.5–80.3)   |
| Guinea–Bissau         | 54.4 (42.2–69.3) | 8.84 (–4.77–26.6)  | 63.3 (44–88)     | 16.2 (–9.2–48.7)  | 6.59 (4.12–9.73)   | 1.08 (–0.55–3.25)    | 7.67 (4.47–12.2)   |
| Liberia               | 150 (118–189)    | 25.4 (–14–78)      | 175 (122–246)    | 16.8 (–9.8–49.0)  | 17.9 (11.4–26.2)   | 3.04 (–1.73–9.46)    | 20.9 (12.4–32.9)   |
| Mali                  | 554 (435–700)    | 103 (–48.1–284)    | 657 (462–910)    | 18.7 (–9.0–50.4)  | 67.1 (42.5–98.6)   | 12.4 (–5.76–35)      | 79.5 (47.3–123)    |
| Mauritania            | 109 (86.5–137)   | 23 (–7.2–56.4)     | 132 (93–181)     | 21.2 (–6.9–52.2)  | 13.2 (8.35–19.3)   | 2.8 (–0.8–7.47)      | 16 (9.41–25.1)     |
| Niger                 | 586 (456–747)    | 64.6 (–72.2–245)   | 651 (455–875)    | 11.2 (–12.5–41.4) | 71.5 (45–105)      | 7.97 (–8.8–30.4)     | 79.4 (47.6–125)    |
| Nigeria               | 5910 (5010–6920) | 1770 (1350–2260)   | 7690 (6470–9090) | 30.0 (24.3–36.0)  | 715 (473–1020)     | 214 (138–311)        | 928 (625–1330)     |
| São Tomé and Príncipe | 6.06 (4.8–7.72)  | 1.12 (–0.489–3.06) | 7.18 (5.07–10)   | 18.5 (–7.8–49.4)  | 0.736 (0.469–1.06) | 0.136 (–0.057–0.392) | 0.872 (0.526–1.36) |
| Senegal               | 413 (327–519)    | 122 (3.12–276)     | 535 (372–747)    | 29.5 (0.9–66.4)   | 49.9 (31.6–73.7)   | 14.8 (0.403–35.4)    | 64.6 (38.3–102)    |
| Sierra Leone          | 258 (203–331)    | 37 (–29.8–113)     | 295 (203–406)    | 14.3 (–11.6–42.3) | 31.2 (19.7–46.1)   | 4.47 (–3.4–14.6)     | 35.7 (21.1–55.6)   |
| Togo                  | 243 (194–309)    | 30.9 (–31.3–110)   | 274 (190–382)    | 12.7 (–13.2–42.6) | 29.4 (18.7–42.9)   | 3.72 (–3.88–13.6)    | 33.1 (19.5–51.1)   |

**Table S10: Meta-regression coefficients from initial and final prevalence-adjustment models for MDD and anxiety disorders**

| Disorder          | Covariate                                         | Initial model |          |       | Final model |          |       |
|-------------------|---------------------------------------------------|---------------|----------|-------|-------------|----------|-------|
|                   |                                                   | <i>B</i>      | <i>p</i> | AIC   | <i>B</i>    | <i>p</i> | AIC   |
| MDD               | COVID-19 impact index                             | 0.4           | 0.003    |       | 0.4         | 0.0044   |       |
|                   | Mid age                                           | > -0.1        | < 0.001  |       | > -0.1      | < 0.001  |       |
|                   | Percent female                                    | 0.1           | < 0.001  |       | 0.1         | < 0.001  |       |
|                   | Combined depressive and anxiety disorder symptoms | < 0.1         | 0.857    | 615.6 | -           | -        | 609.9 |
|                   | Cross-sectional random sample                     | > -0.1        | 0.978    |       | -           | -        |       |
|                   | Longitudinal market research / quota sample       | -0.2          | 0.590    |       | -           | -        |       |
|                   | Cross-sectional market research / quota sample    | 0.9           | < 0.001  |       | 0.9         | < 0.001  |       |
| Anxiety disorders | COVID-19 impact index                             | 0.4           | < 0.001  |       | 0.4         | < 0.001  |       |
|                   | Mid age                                           | > -0.1        | < 0.001  |       | > -0.1      | < 0.001  |       |
|                   | Percent female                                    | 0.1           | < 0.001  |       | 0.1         | < 0.001  |       |
|                   | Combined depressive and anxiety disorder symptoms | 0.3           | 0.007    | 270.6 | 0.3         | 0.008    | 267.3 |
|                   | Cross-sectional random sample                     | -0.1          | 0.880    |       | -           | -        |       |
|                   | Longitudinal market research / quota sample       | -0.4          | 0.426    |       | -           | -        |       |
|                   | Cross-sectional market research / quota sample    | 0.6           | 0.004    |       | -0.6        | 0.002    |       |

MDD = Major depressive disorder. AIC = Akaike information criterion.

**Table S11: Leave-one-country-out cross-validation analysis results**

| Disorder | Location | Study             | Mid age | % female | Observation (CI)       | Prediction (PI)        | Outside PI | LOCOCV RMSE | Benchmark RMSE |
|----------|----------|-------------------|---------|----------|------------------------|------------------------|------------|-------------|----------------|
| MDD      | USA      | Marroquin et al   | 46      | 50       | -0.04 (-0.58 to 0.5)   | -0.38 (-1.72 to 0.96)  | No         | 0.66        | 0.65           |
|          |          | Wanberg et al     | 56      | 56       | -0.2 (-0.45 to 0.06)   | -0.35 (-1.7 to 1)      | No         |             |                |
|          |          | Katz et al        | 46      | 0        | 0.3 (-0.78 to 1.38)    | -0.35 (-1.69 to 1)     | No         |             |                |
|          |          | Katz et al        | 46      | 0        | 0.27 (-0.76 to 1.3)    | -0.35 (-1.69 to 1)     | No         |             |                |
|          |          | Katz et al        | 46      | 100      | 0.13 (-0.87 to 1.13)   | -0.43 (-1.77 to 0.91)  | No         |             |                |
|          |          | Katz et al        | 46      | 100      | 0.22 (-0.7 to 1.14)    | -0.43 (-1.77 to 0.91)  | No         |             |                |
|          |          | McGinty et al (a) | 24      | 0        | -2.24 (-2.92 to -1.55) | -1.3 (-2.58 to -0.02)  | No         |             |                |
|          |          | McGinty et al (a) | 24      | 100      | -2.04 (-2.7 to -1.37)  | -1.38 (-2.66 to -0.1)  | No         |             |                |
|          |          | McGinty et al (a) | 42      | 0        | -1.5 (-2.05 to -0.94)  | -1.21 (-2.49 to 0.07)  | No         |             |                |
|          |          | McGinty et al (a) | 42      | 100      | -1.3 (-1.83 to -0.77)  | -1.29 (-2.56 to -0.01) | No         |             |                |
|          |          | McGinty et al (a) | 77      | 0        | -0.82 (-1.45 to -0.19) | -1.04 (-2.32 to 0.24)  | No         |             |                |
|          |          | McGinty et al (a) | 77      | 100      | -0.62 (-1.23 to -0.01) | -1.12 (-2.39 to 0.16)  | No         |             |                |
|          |          | Twenge et al      | 24      | 0        | -2.57 (-2.91 to -2.23) | -1.36 (-2.65 to -0.06) | No         |             |                |
|          |          | Twenge et al      | 37      | 0        | -2.46 (-2.77 to -2.16) | -1.28 (-2.57 to 0.01)  | No         |             |                |
|          |          | Twenge et al      | 52      | 0        | -1.87 (-2.2 to -1.54)  | -1.2 (-2.49 to 0.09)   | No         |             |                |
|          |          | Twenge et al      | 52      | 100      | -2.49 (-2.82 to -2.16) | -1.29 (-2.57 to 0)     | No         |             |                |
|          |          | Twenge et al      | 80      | 0        | -1.3 (-1.71 to -0.88)  | -1.05 (-2.34 to 0.25)  | No         |             |                |
|          |          | Twenge et al      | 80      | 100      | -1.92 (-2.34 to -1.5)  | -1.13 (-2.42 to 0.16)  | No         |             |                |
|          |          | McGinty et al (b) | 24      | 0        | -2.48 (-3.33 to -1.63) | -1.22 (-2.49 to 0.06)  | No         |             |                |
|          |          | McGinty et al (b) | 24      | 100      | -2.07 (-2.9 to -1.24)  | -1.28 (-2.55 to 0)     | No         |             |                |
|          |          | McGinty et al (b) | 42      | 0        | -1.39 (-2 to -0.77)    | -1.14 (-2.42 to 0.13)  | No         |             |                |
|          |          | McGinty et al (b) | 42      | 100      | -0.98 (-1.56 to -0.39) | -1.21 (-2.48 to 0.07)  | No         |             |                |
|          |          | McGinty et al (b) | 77      | 0        | -0.87 (-1.59 to -0.15) | -1.01 (-2.28 to 0.27)  | No         |             |                |
|          |          | McGinty et al (b) | 77      | 100      | -0.46 (-1.15 to 0.23)  | -1.07 (-2.34 to 0.21)  | No         |             |                |
|          |          | Bryan et al       | 58      | 51       | -1.41 (-1.51 to -1.3)  | -1.12 (-2.39 to 0.15)  | No         |             |                |
|          |          | Kantor et al      | 58      | 0        | -1.19 (-1.46 to -0.92) | -1.14 (-2.42 to 0.14)  | No         |             |                |
|          |          | Kantor et al      | 58      | 100      | -1.14 (-1.38 to -0.91) | -1.22 (-2.5 to 0.06)   | No         |             |                |
|          |          | Wilson et al      | 52      | 51       | -0.9 (-1.1 to -0.71)   | -1.24 (-2.52 to 0.04)  | No         |             |                |

|  |       |                |    |     |                        |                        |    |      |      |
|--|-------|----------------|----|-----|------------------------|------------------------|----|------|------|
|  |       | Ettman et al   | 28 | 0   | -1.9 (-2.26 to -1.54)  | -1.33 (-2.62 to -0.04) | No |      |      |
|  |       | Ettman et al   | 28 | 100 | -2.06 (-2.4 to -1.72)  | -1.42 (-2.71 to -0.13) | No |      |      |
|  |       | Ettman et al   | 50 | 0   | -1.41 (-1.8 to -1.02)  | -1.21 (-2.5 to 0.07)   | No |      |      |
|  |       | Ettman et al   | 50 | 100 | -1.57 (-1.95 to -1.2)  | -1.3 (-2.59 to -0.02)  | No |      |      |
|  |       | Ettman et al   | 80 | 0   | -0.76 (-1.19 to -0.32) | -1.05 (-2.34 to 0.25)  | No |      |      |
|  |       | Ettman et al   | 80 | 100 | -0.92 (-1.34 to -0.5)  | -1.14 (-2.43 to 0.16)  | No |      |      |
|  |       | Killgore et al | 51 | 56  | -1.56 (-1.73 to -1.4)  | -1.28 (-2.57 to 0.01)  | No |      |      |
|  |       | Maxfield et al | 50 | 0   | -1.1 (-1.47 to -0.73)  | -1.18 (-2.46 to 0.1)   | No |      |      |
|  |       | Maxfield et al | 50 | 100 | -1.28 (-1.58 to -0.99) | -1.26 (-2.53 to 0.02)  | No |      |      |
|  |       | Killgore et al | 51 | 55  | -1.64 (-1.8 to -1.48)  | -1.17 (-2.44 to 0.1)   | No |      |      |
|  |       | Killgore et al | 51 | 54  | -1.71 (-1.87 to -1.55) | -1.11 (-2.39 to 0.17)  | No |      |      |
|  |       | Zhou et al     | 54 | 52  | -0.46 (-0.66 to -0.26) | -1.22 (-2.5 to 0.06)   | No |      |      |
|  |       | Vieira et al   | 46 | 0   | -0.22 (-0.58 to 0.15)  | -1.2 (-2.48 to 0.08)   | No |      |      |
|  |       | Vieira et al   | 46 | 0   | -0.12 (-0.45 to 0.21)  | -1.2 (-2.48 to 0.08)   | No |      |      |
|  |       | Vieira et al   | 46 | 100 | -0.13 (-0.46 to 0.21)  | -1.28 (-2.56 to 0)     | No |      |      |
|  |       | Zhou et al     | 54 | 52  | -0.17 (-0.4 to 0.06)   | -1.16 (-2.44 to 0.11)  | No |      |      |
|  |       | Zhou et al     | 54 | 52  | -0.1 (-0.36 to 0.17)   | -1.13 (-2.4 to 0.14)   | No |      |      |
|  | China | Zhang et al    | 13 | 41  | -0.38 (-0.57 to -0.19) | -0.02 (-1.46 to 1.42)  | No | 0.68 | 0.71 |
|  |       | Choi et al     | 58 | 55  | -0.98 (-1.35 to -0.61) | -0.09 (-1.47 to 1.3)   | No |      |      |
|  | Japan | Kikuchi et al  | 24 | 0   | -0.12 (-0.67 to 0.43)  | -0.1 (-1.66 to 1.46)   | No | 0.46 | 0.58 |
|  |       | Kikuchi et al  | 24 | 100 | -0.21 (-0.75 to 0.34)  | -0.12 (-1.68 to 1.44)  | No |      |      |
|  |       | Kikuchi et al  | 34 | 0   | 0.06 (-0.46 to 0.59)   | -0.09 (-1.64 to 1.47)  | No |      |      |
|  |       | Kikuchi et al  | 34 | 100 | -0.02 (-0.54 to 0.5)   | -0.11 (-1.66 to 1.45)  | No |      |      |
|  |       | Kikuchi et al  | 44 | 0   | -0.32 (-0.89 to 0.25)  | -0.07 (-1.63 to 1.49)  | No |      |      |
|  |       | Kikuchi et al  | 44 | 100 | -0.41 (-0.97 to 0.16)  | -0.09 (-1.65 to 1.47)  | No |      |      |
|  |       | Kikuchi et al  | 54 | 0   | -0.16 (-0.81 to 0.5)   | -0.06 (-1.61 to 1.5)   | No |      |      |
|  |       | Kikuchi et al  | 54 | 100 | -0.24 (-0.89 to 0.41)  | -0.08 (-1.63 to 1.48)  | No |      |      |
|  |       | Kikuchi et al  | 64 | 0   | -0.56 (-1.34 to 0.22)  | -0.04 (-1.6 to 1.51)   | No |      |      |
|  |       | Kikuchi et al  | 64 | 100 | -0.64 (-1.42 to 0.13)  | -0.06 (-1.62 to 1.49)  | No |      |      |
|  |       | Kikuchi et al  | 74 | 0   | -0.49 (-1.4 to 0.42)   | -0.03 (-1.58 to 1.53)  | No |      |      |

|  |  |                |    |     |                        |                       |    |  |  |
|--|--|----------------|----|-----|------------------------|-----------------------|----|--|--|
|  |  | Kikuchi et al  | 74 | 100 | -0.57 (-1.48 to 0.34)  | -0.05 (-1.6 to 1.51)  | No |  |  |
|  |  | Yamamoto et al | 18 | 0   | -1.95 (-2.36 to -1.53) | -1.17 (-2.65 to 0.32) | No |  |  |
|  |  | Yamamoto et al | 18 | 100 | -2.09 (-2.5 to -1.68)  | -1.21 (-2.7 to 0.28)  | No |  |  |
|  |  | Yamamoto et al | 30 | 0   | -0.95 (-1.1 to -0.8)   | -1.13 (-2.62 to 0.35) | No |  |  |
|  |  | Yamamoto et al | 30 | 100 | -1.09 (-1.23 to -0.95) | -1.18 (-2.66 to 0.31) | No |  |  |
|  |  | Yamamoto et al | 52 | 0   | -0.89 (-1.03 to -0.74) | -1.06 (-2.54 to 0.42) | No |  |  |
|  |  | Yamamoto et al | 52 | 100 | -1.02 (-1.16 to -0.89) | -1.1 (-2.59 to 0.38)  | No |  |  |
|  |  | Yamamoto et al | 77 | 0   | 0.24 (-0.14 to 0.61)   | -0.98 (-2.46 to 0.5)  | No |  |  |
|  |  | Yamamoto et al | 77 | 100 | 0.1 (-0.28 to 0.47)    | -1.03 (-2.51 to 0.46) | No |  |  |
|  |  | Kiuchi et al   | 21 | 100 | -1.06 (-1.57 to -0.55) | -1.18 (-2.68 to 0.31) | No |  |  |
|  |  | Kiuchi et al   | 24 | 0   | -0.36 (-1.04 to 0.33)  | -1.13 (-2.63 to 0.36) | No |  |  |
|  |  | Kiuchi et al   | 27 | 100 | -0.58 (-1.02 to -0.15) | -1.16 (-2.66 to 0.33) | No |  |  |
|  |  | Kiuchi et al   | 32 | 0   | -0.77 (-1.39 to -0.15) | -1.11 (-2.6 to 0.38)  | No |  |  |
|  |  | Kiuchi et al   | 32 | 100 | -1 (-1.37 to -0.64)    | -1.15 (-2.64 to 0.34) | No |  |  |
|  |  | Kiuchi et al   | 37 | 0   | -1.09 (-1.69 to -0.49) | -1.09 (-2.58 to 0.4)  | No |  |  |
|  |  | Kiuchi et al   | 37 | 100 | -1.01 (-1.45 to -0.57) | -1.13 (-2.63 to 0.36) | No |  |  |
|  |  | Kiuchi et al   | 42 | 100 | -0.96 (-1.43 to -0.49) | -1.12 (-2.61 to 0.37) | No |  |  |
|  |  | Kiuchi et al   | 44 | 0   | -1.02 (-1.54 to -0.49) | -1.07 (-2.56 to 0.42) | No |  |  |
|  |  | Kiuchi et al   | 47 | 100 | -0.97 (-1.65 to -0.29) | -1.11 (-2.6 to 0.39)  | No |  |  |
|  |  | Kiuchi et al   | 74 | 0   | -0.81 (-1.65 to 0.02)  | -0.99 (-2.47 to 0.5)  | No |  |  |
|  |  | Kiuchi et al   | 74 | 100 | -1.04 (-1.7 to -0.38)  | -1.02 (-2.51 to 0.47) | No |  |  |
|  |  | Ueda et al     | 58 | 0   | -1.23 (-1.67 to -0.79) | -1.03 (-2.52 to 0.45) | No |  |  |
|  |  | Ueda et al     | 58 | 100 | -0.75 (-1.08 to -0.41) | -1.07 (-2.56 to 0.42) | No |  |  |
|  |  | Yamamoto et al | 54 | 52  | -0.99 (-1.24 to -0.75) | -1.09 (-2.57 to 0.39) | No |  |  |
|  |  | Fukase et al   | 24 | 0   | -1.79 (-2.58 to -1.01) | -1.07 (-2.59 to 0.45) | No |  |  |
|  |  | Fukase et al   | 24 | 100 | -0.98 (-1.72 to -0.24) | -1.09 (-2.61 to 0.43) | No |  |  |
|  |  | Fukase et al   | 34 | 0   | -1.7 (-2.52 to -0.88)  | -1.05 (-2.56 to 0.47) | No |  |  |
|  |  | Fukase et al   | 34 | 100 | -0.89 (-1.67 to -0.12) | -1.07 (-2.59 to 0.45) | No |  |  |
|  |  | Fukase et al   | 44 | 0   | -1.96 (-2.8 to -1.13)  | -1.03 (-2.54 to 0.49) | No |  |  |
|  |  | Fukase et al   | 44 | 100 | -1.15 (-1.95 to -0.36) | -1.05 (-2.57 to 0.47) | No |  |  |

|  |                |                |     |                        |                        |                        |     |      |      |
|--|----------------|----------------|-----|------------------------|------------------------|------------------------|-----|------|------|
|  |                | Fukase et al   | 54  | 0                      | -1.25 (-1.94 to -0.55) | -1.01 (-2.52 to 0.51)  | No  |      |      |
|  |                | Fukase et al   | 54  | 100                    | -0.44 (-1.08 to 0.21)  | -1.03 (-2.55 to 0.49)  | No  |      |      |
|  |                | Fukase et al   | 64  | 0                      | -1.28 (-2.25 to -0.3)  | -0.99 (-2.5 to 0.53)   | No  |      |      |
|  |                | Fukase et al   | 64  | 100                    | -0.47 (-1.4 to 0.47)   | -1.01 (-2.53 to 0.51)  | No  |      |      |
|  | Czechia        | Winkler et al  | 58  | 54                     | -1.17 (-1.39 to -0.96) | -1.02 (-2.36 to 0.33)  | No  | 0.16 | 0.06 |
|  | UK             | Shevlin et al  | 50  | 52                     | -0.97 (-1.22 to -0.72) | -1.21 (-2.51 to 0.09)  | No  | 0.72 | 0.53 |
|  |                | O'Connor et al | 58  | 51                     | -1.2 (-1.44 to -0.95)  | -1.03 (-2.49 to 0.42)  | No  |      |      |
|  |                | Groarke et al  | 52  | 65                     | -1.52 (-1.77 to -1.26) | -1.23 (-2.61 to 0.14)  | No  |      |      |
|  |                | O'Connor et al | 58  | 51                     | -1.1 (-1.35 to -0.86)  | -1.03 (-2.48 to 0.42)  | No  |      |      |
|  |                | Pieh et al (c) | 26  | 0                      | -2.66 (-3.46 to -1.86) | -2.08 (-3.5 to -0.65)  | No  |      |      |
|  |                | Pieh et al (c) | 26  | 100                    | -2.63 (-3.37 to -1.9)  | -2.18 (-3.6 to -0.76)  | No  |      |      |
|  |                | Pieh et al (c) | 50  | 0                      | -2.25 (-2.89 to -1.61) | -1.27 (-2.67 to 0.13)  | No  |      |      |
|  |                | Pieh et al (c) | 50  | 100                    | -2.23 (-2.79 to -1.66) | -1.38 (-2.77 to 0.02)  | No  |      |      |
|  |                | Pieh et al (c) | 82  | 0                      | -0.91 (-1.77 to -0.06) | -0.16 (-1.6 to 1.28)   | No  |      |      |
|  |                | Pieh et al (c) | 82  | 100                    | -0.89 (-1.69 to -0.09) | -0.27 (-1.69 to 1.16)  | No  |      |      |
|  |                | O'Connor et al | 58  | 51                     | -1.07 (-1.31 to -0.82) | -1.01 (-2.35 to 0.33)  | No  |      |      |
|  |                | Widnall et al  | 14  | 0                      | 0.13 (-0.21 to 0.46)   | -1.56 (-3.18 to 0.07)  | Yes |      |      |
|  |                | Widnall et al  | 14  | 100                    | -0.14 (-0.37 to 0.1)   | -1.66 (-3.28 to -0.04) | No  |      |      |
|  |                | Vizard et al   | 28  | 0                      | -1.29 (-2.1 to -0.48)  | -0.7 (-2.13 to 0.72)   | No  |      |      |
|  |                | Vizard et al   | 28  | 100                    | -1.32 (-2.04 to -0.6)  | -0.77 (-2.19 to 0.65)  | No  |      |      |
|  |                | Vizard et al   | 54  | 0                      | -0.24 (-0.93 to 0.44)  | -0.13 (-1.55 to 1.29)  | No  |      |      |
|  |                | Vizard et al   | 54  | 100                    | -0.27 (-0.84 to 0.3)   | -0.19 (-1.61 to 1.22)  | No  |      |      |
|  |                | Vizard et al   | 84  | 0                      | -0.77 (-1.6 to 0.06)   | 0.52 (-0.92 to 1.95)   | No  |      |      |
|  |                | Vizard et al   | 84  | 100                    | -0.8 (-1.54 to -0.05)  | 0.45 (-0.98 to 1.88)   | No  |      |      |
|  |                | Katz et al     | 48  | 0                      | -0.32 (-1.43 to 0.79)  | -0.45 (-2.09 to 1.2)   | No  |      |      |
|  | Katz et al     | 48             | 0   | -0.46 (-1.55 to 0.63)  | -0.45 (-2.09 to 1.2)   | No                     |     |      |      |
|  | Katz et al     | 48             | 100 | -0.18 (-1.03 to 0.66)  | -0.56 (-2.19 to 1.08)  | No                     |     |      |      |
|  | Katz et al     | 48             | 100 | -0.18 (-1 to 0.65)     | -0.56 (-2.19 to 1.08)  | No                     |     |      |      |
|  | Kwong et al    | 28             | 73  | 0.34 (0.19 to 0.49)    | -1.23 (-2.87 to 0.41)  | No                     |     |      |      |
|  | Daly et al (a) | 26             | 0   | -0.71 (-0.85 to -0.57) | -1.22 (-2.88 to 0.43)  | No                     |     |      |      |



|  |           |                |    |     |                        |                       |    |      |      |
|--|-----------|----------------|----|-----|------------------------|-----------------------|----|------|------|
|  |           | Daly et al (a) | 26 | 100 | -0.88 (-1.02 to -0.75) | -1.33 (-2.98 to 0.31) | No |      |      |
|  |           | Daly et al (a) | 42 | 0   | -0.55 (-0.69 to -0.42) | -0.66 (-2.29 to 0.98) | No |      |      |
|  |           | Daly et al (a) | 42 | 100 | -0.73 (-0.86 to -0.6)  | -0.77 (-2.4 to 0.86)  | No |      |      |
|  |           | Daly et al (a) | 57 | 0   | -0.34 (-0.48 to -0.21) | -0.12 (-1.76 to 1.52) | No |      |      |
|  |           | Daly et al (a) | 57 | 100 | -0.52 (-0.65 to -0.39) | -0.23 (-1.86 to 1.39) | No |      |      |
|  |           | Daly et al (a) | 82 | 0   | -0.66 (-0.81 to -0.51) | 0.76 (-0.91 to 2.44)  | No |      |      |
|  |           | Daly et al (a) | 82 | 100 | -0.83 (-0.98 to -0.69) | 0.65 (-1.01 to 2.32)  | No |      |      |
|  |           | Daly et al (a) | 26 | 0   | -0.54 (-0.68 to -0.4)  | -1 (-2.53 to 0.53)    | No |      |      |
|  |           | Daly et al (a) | 26 | 100 | -0.62 (-0.75 to -0.49) | -1.09 (-2.62 to 0.43) | No |      |      |
|  |           | Daly et al (a) | 42 | 0   | -0.48 (-0.62 to -0.34) | -0.54 (-2.05 to 0.98) | No |      |      |
|  |           | Daly et al (a) | 42 | 100 | -0.56 (-0.69 to -0.43) | -0.63 (-2.14 to 0.88) | No |      |      |
|  |           | Daly et al (a) | 57 | 0   | -0.32 (-0.46 to -0.19) | -0.1 (-1.62 to 1.42)  | No |      |      |
|  |           | Daly et al (a) | 57 | 100 | -0.4 (-0.53 to -0.28)  | -0.19 (-1.7 to 1.32)  | No |      |      |
|  |           | Daly et al (a) | 82 | 0   | -0.53 (-0.69 to -0.38) | 0.63 (-0.92 to 2.17)  | No |      |      |
|  |           | Daly et al (a) | 82 | 100 | -0.61 (-0.76 to -0.47) | 0.54 (-1 to 2.07)     | No |      |      |
|  |           | Daly et al (a) | 26 | 0   | -0.41 (-0.55 to -0.27) | -0.72 (-2.15 to 0.7)  | No |      |      |
|  |           | Daly et al (a) | 26 | 100 | -0.43 (-0.56 to -0.29) | -0.79 (-2.21 to 0.63) | No |      |      |
|  |           | Daly et al (a) | 42 | 0   | -0.39 (-0.53 to -0.25) | -0.39 (-1.8 to 1.03)  | No |      |      |
|  |           | Daly et al (a) | 42 | 100 | -0.4 (-0.54 to -0.27)  | -0.45 (-1.87 to 0.96) | No |      |      |
|  |           | Daly et al (a) | 57 | 0   | -0.3 (-0.43 to -0.16)  | -0.07 (-1.49 to 1.35) | No |      |      |
|  |           | Daly et al (a) | 57 | 100 | -0.31 (-0.44 to -0.18) | -0.14 (-1.55 to 1.28) | No |      |      |
|  |           | Daly et al (a) | 82 | 0   | -0.43 (-0.58 to -0.28) | 0.46 (-0.98 to 1.89)  | No |      |      |
|  |           | Daly et al (a) | 82 | 100 | -0.44 (-0.59 to -0.3)  | 0.39 (-1.04 to 1.82)  | No |      |      |
|  | Norway    | Knudsen et al  | 42 | 62  | 0.47 (-0.35 to 1.3)    | -0.2 (-1.59 to 1.2)   | No | 0.68 | 0.78 |
|  |           | Knudsen et al  | 42 | 62  | 0.75 (-0.25 to 1.74)   | -0.11 (-1.53 to 1.32) | No |      |      |
|  |           | Knudsen et al  | 42 | 62  | -0.55 (-1.3 to 0.2)    | -0.1 (-1.53 to 1.32)  | No |      |      |
|  | Australia | ABS (2020)     | 26 | 0   | -1.24 (-1.73 to -0.75) | -0.1 (-1.56 to 1.36)  | No | 0.51 | 0.51 |
|  |           | ABS (2020)     | 50 | 0   | -0.16 (-0.51 to 0.19)  | -0.06 (-1.52 to 1.4)  | No |      |      |
|  |           | ABS (2020)     | 50 | 100 | -0.48 (-0.77 to -0.19) | -0.08 (-1.54 to 1.38) | No |      |      |
|  |           | ABS (2020)     | 82 | 0   | 0.29 (-0.15 to 0.72)   | -0.02 (-1.47 to 1.44) | No |      |      |

|  |                |                      |                |     |                        |                        |                       |      |      |
|--|----------------|----------------------|----------------|-----|------------------------|------------------------|-----------------------|------|------|
|  |                | ABS (2020)           | 82             | 100 | -0.04 (-0.43 to 0.36)  | -0.03 (-1.49 to 1.42)  | No                    |      |      |
|  |                | Biddle et al         | 58             | 50  | -0.26 (-0.43 to -0.09) | -0.11 (-1.55 to 1.32)  | No                    |      |      |
|  | New Zealand    | Sibley et al         | 58             | 65  | 0.14 (-0.23 to 0.5)    | -0.11 (-1.52 to 1.31)  | No                    | 0.57 | 0.56 |
|  |                | Every-Palmer et al   | 21             | 51  | -1.97 (-2.34 to -1.61) | -1.23 (-2.54 to 0.07)  | No                    |      |      |
|  |                | Every-Palmer et al   | 30             | 51  | -2.09 (-2.39 to -1.79) | -1.2 (-2.5 to 0.11)    | No                    |      |      |
|  |                | Every-Palmer et al   | 40             | 51  | -2.31 (-2.65 to -1.98) | -1.15 (-2.45 to 0.15)  | No                    |      |      |
|  |                | Every-Palmer et al   | 50             | 51  | -1.47 (-1.81 to -1.13) | -1.11 (-2.41 to 0.19)  | No                    |      |      |
|  |                | Every-Palmer et al   | 60             | 51  | -0.93 (-1.34 to -0.51) | -1.06 (-2.36 to 0.24)  | No                    |      |      |
|  |                | Every-Palmer et al   | 70             | 51  | -1 (-1.56 to -0.45)    | -1.02 (-2.32 to 0.28)  | No                    |      |      |
|  |                | Every-Palmer et al   | 82             | 51  | -0.83 (-1.7 to 0.04)   | -0.96 (-2.26 to 0.34)  | No                    |      |      |
|  |                | Bulbulia et al       | 58             | 65  | 0.04 (-0.34 to 0.42)   | -0.11 (-1.53 to 1.31)  | No                    |      |      |
|  |                | Austria              | Pieh et al (b) | 54  | 0                      | -1.52 (-2.1 to -0.95)  | -1.07 (-2.37 to 0.24) |      |      |
|  | Pieh et al (b) |                      | 54             | 100 | -1.5 (-2.04 to -0.97)  | -1.13 (-2.43 to 0.17)  | No                    |      |      |
|  | Pieh et al (b) |                      | 82             | 0   | -1.11 (-1.99 to -0.23) | -0.94 (-2.24 to 0.37)  | No                    |      |      |
|  | Pieh et al (b) |                      | 82             | 100 | -1.09 (-1.94 to -0.23) | -1 (-2.3 to 0.31)      | No                    |      |      |
|  | Denmark        | Sønderskov et al (b) | 58             | 0   | -0.11 (-0.29 to 0.07)  | -1.16 (-2.39 to 0.08)  | No                    | 1.16 | 1.21 |
|  |                | Sønderskov et al (b) | 58             | 100 | -0.21 (-0.38 to -0.05) | -1.24 (-2.47 to 0)     | No                    |      |      |
|  |                | Sønderskov et al (a) | 58             | 0   | 0.16 (-0.04 to 0.36)   | -1.12 (-2.35 to 0.11)  | Yes                   |      |      |
|  |                | Sønderskov et al (a) | 58             | 100 | 0.09 (-0.09 to 0.27)   | -1.17 (-2.4 to 0.06)   | Yes                   |      |      |
|  | France         | Peretti-Watel et al  | 58             | 52  | -1.37 (-1.49 to -1.25) | -1.18 (-2.52 to 0.17)  | No                    | 0.2  | 0.34 |
|  | Germany        | Peters et al         | 47             | 52  | -0.34 (-0.38 to -0.31) | -0.17 (-1.54 to 1.21)  | No                    | 0.18 | 0.24 |
|  | Ireland        | Daly et al (b)       | 26             | 0   | -1.72 (-2.1 to -1.34)  | -1.38 (-2.71 to -0.06) | No                    | 0.65 | 0.69 |
|  |                | Daly et al (b)       | 26             | 100 | -1.9 (-2.26 to -1.53)  | -1.47 (-2.79 to -0.15) | No                    |      |      |
|  |                | Daly et al (b)       | 44             | 0   | -1.05 (-1.45 to -0.65) | -1.27 (-2.59 to 0.05)  | No                    |      |      |
|  |                | Daly et al (b)       | 44             | 100 | -1.22 (-1.6 to -0.84)  | -1.36 (-2.68 to -0.05) | No                    |      |      |
|  |                | Daly et al (b)       | 77             | 0   | -0.08 (-0.69 to 0.54)  | -1.08 (-2.41 to 0.25)  | No                    |      |      |
|  |                | Daly et al (b)       | 77             | 100 | -0.25 (-0.85 to 0.35)  | -1.17 (-2.5 to 0.15)   | No                    |      |      |
|  |                | Daly et al (b)       | 26             | 0   | -1.28 (-1.69 to -0.87) | -1.35 (-2.67 to -0.03) | No                    |      |      |
|  |                | Daly et al (b)       | 26             | 100 | -1.5 (-1.88 to -1.13)  | -1.44 (-2.75 to -0.13) | No                    |      |      |
|  |                | Daly et al (b)       | 44             | 0   | -0.94 (-1.37 to -0.51) | -1.25 (-2.56 to 0.07)  | No                    |      |      |

|  |             |                      |    |     |                        |                        |    |      |      |
|--|-------------|----------------------|----|-----|------------------------|------------------------|----|------|------|
|  |             | Daly et al (b)       | 44 | 100 | -1.16 (-1.56 to -0.77) | -1.34 (-2.65 to -0.03) | No |      |      |
|  |             | Daly et al (b)       | 77 | 0   | 0.21 (-0.32 to 0.75)   | -1.07 (-2.39 to 0.25)  | No |      |      |
|  |             | Daly et al (b)       | 77 | 100 | -0.01 (-0.52 to 0.5)   | -1.16 (-2.47 to 0.16)  | No |      |      |
|  |             | Daly et al (b)       | 26 | 0   | -1.72 (-2.1 to -1.35)  | -1.18 (-2.49 to 0.13)  | No |      |      |
|  |             | Daly et al (b)       | 26 | 100 | -1.76 (-2.12 to -1.4)  | -1.24 (-2.54 to 0.07)  | No |      |      |
|  |             | Daly et al (b)       | 44 | 0   | -1.2 (-1.59 to -0.81)  | -1.11 (-2.42 to 0.19)  | No |      |      |
|  |             | Daly et al (b)       | 44 | 100 | -1.24 (-1.62 to -0.87) | -1.17 (-2.48 to 0.14)  | No |      |      |
|  |             | Daly et al (b)       | 77 | 0   | -0.1 (-0.58 to 0.38)   | -1 (-2.31 to 0.31)     | No |      |      |
|  |             | Daly et al (b)       | 77 | 100 | -0.14 (-0.61 to 0.33)  | -1.05 (-2.36 to 0.26)  | No |      |      |
|  | Netherlands | Van der Velden et al | 26 | 0   | 0.14 (-0.16 to 0.44)   | -0.24 (-1.67 to 1.19)  | No | 0.25 | 0.32 |
|  |             | Van der Velden et al | 26 | 100 | 0.26 (-0.03 to 0.54)   | -0.29 (-1.72 to 1.14)  | No |      |      |
|  |             | Van der Velden et al | 42 | 0   | -0.24 (-0.55 to 0.07)  | -0.18 (-1.61 to 1.25)  | No |      |      |
|  |             | Van der Velden et al | 42 | 100 | -0.12 (-0.42 to 0.18)  | -0.23 (-1.66 to 1.2)   | No |      |      |
|  |             | Van der Velden et al | 57 | 0   | -0.29 (-0.61 to 0.04)  | -0.12 (-1.56 to 1.31)  | No |      |      |
|  |             | Van der Velden et al | 57 | 100 | -0.17 (-0.48 to 0.14)  | -0.17 (-1.61 to 1.26)  | No |      |      |
|  |             | Van der Velden et al | 82 | 0   | -0.03 (-0.39 to 0.32)  | -0.03 (-1.47 to 1.41)  | No |      |      |
|  |             | Van der Velden et al | 82 | 100 | 0.08 (-0.26 to 0.43)   | -0.08 (-1.52 to 1.35)  | No |      |      |
|  | Spain       | Ayuso-Mateos et al   | 34 | 0   | -1.47 (-3.45 to 0.52)  | -0.24 (-1.62 to 1.13)  | No | 0.75 | 0.86 |
|  |             | Ayuso-Mateos et al   | 34 | 100 | -1.26 (-3.21 to 0.69)  | -0.31 (-1.68 to 1.07)  | No |      |      |
|  |             | Ayuso-Mateos et al   | 74 | 0   | -0.55 (-2.5 to 1.41)   | -0.09 (-1.47 to 1.28)  | No |      |      |
|  |             | Ayuso-Mateos et al   | 74 | 100 | -0.35 (-2.27 to 1.57)  | -0.16 (-1.54 to 1.22)  | No |      |      |
|  |             | Valiente et al       | 30 | 0   | -2.49 (-2.82 to -2.16) | -1.42 (-2.83 to -0.01) | No |      |      |
|  |             | Valiente et al       | 30 | 100 | -2.49 (-2.8 to -2.17)  | -1.55 (-2.97 to -0.14) | No |      |      |
|  |             | Valiente et al       | 40 | 0   | -2.15 (-2.45 to -1.85) | -1.35 (-2.76 to 0.05)  | No |      |      |
|  |             | Valiente et al       | 40 | 100 | -2.15 (-2.44 to -1.87) | -1.48 (-2.89 to -0.07) | No |      |      |
|  |             | Valiente et al       | 50 | 0   | -1.07 (-1.37 to -0.76) | -1.28 (-2.68 to 0.13)  | No |      |      |
|  |             | Valiente et al       | 50 | 100 | -1.07 (-1.36 to -0.78) | -1.41 (-2.82 to 0)     | No |      |      |
|  |             | Valiente et al       | 60 | 0   | -0.73 (-1.05 to -0.42) | -1.21 (-2.61 to 0.2)   | No |      |      |
|  |             | Valiente et al       | 60 | 100 | -0.74 (-1.03 to -0.44) | -1.34 (-2.75 to 0.07)  | No |      |      |
|  |             | Valiente et al       | 70 | 0   | -0.38 (-0.96 to 0.2)   | -1.13 (-2.54 to 0.28)  | No |      |      |

|                   |              |                   |                      |                        |                        |                       |      |      |      |
|-------------------|--------------|-------------------|----------------------|------------------------|------------------------|-----------------------|------|------|------|
| Anxiety disorders | USA          | Valiente et al    | 70                   | 100                    | -0.38 (-0.95 to 0.19)  | -1.26 (-2.68 to 0.15) | No   | 0.78 | 0.76 |
|                   |              | Marroquin et al   | 46                   | 50                     | -0.21 (-0.85 to 0.43)  | -0.27 (-1.45 to 0.9)  | No   |      |      |
|                   |              | Kantor et al      | 58                   | 0                      | -1.86 (-2.1 to -1.63)  | -0.85 (-2.39 to 0.69) | No   |      |      |
|                   |              | Kantor et al      | 58                   | 100                    | -1.6 (-1.8 to -1.4)    | -0.94 (-2.48 to 0.6)  | No   |      |      |
|                   |              | Katz et al        | 46                   | 0                      | 0.21 (-1.05 to 1.47)   | -0.29 (-1.48 to 0.9)  | No   |      |      |
|                   |              | Katz et al        | 46                   | 0                      | 0.27 (-0.76 to 1.3)    | -0.5 (-1.72 to 0.72)  | No   |      |      |
|                   |              | Katz et al        | 46                   | 100                    | 0.45 (-0.88 to 1.78)   | -0.39 (-1.57 to 0.79) | No   |      |      |
|                   |              | Katz et al        | 46                   | 100                    | 0.22 (-0.7 to 1.14)    | -0.6 (-1.81 to 0.61)  | No   |      |      |
|                   |              | McGinty et al (a) | 24                   | 0                      | -2.24 (-2.92 to -1.55) | -1.09 (-2.66 to 0.49) | No   |      |      |
|                   |              | McGinty et al (a) | 24                   | 100                    | -2.04 (-2.7 to -1.37)  | -1.18 (-2.75 to 0.4)  | No   |      |      |
|                   |              | McGinty et al (a) | 42                   | 0                      | -1.5 (-2.05 to -0.94)  | -1.06 (-2.62 to 0.51) | No   |      |      |
|                   |              | McGinty et al (a) | 42                   | 100                    | -1.3 (-1.83 to -0.77)  | -1.14 (-2.71 to 0.42) | No   |      |      |
|                   |              | McGinty et al (a) | 77                   | 0                      | -0.82 (-1.45 to -0.19) | -1 (-2.56 to 0.57)    | No   |      |      |
|                   |              | McGinty et al (a) | 77                   | 100                    | -0.62 (-1.23 to -0.01) | -1.08 (-2.65 to 0.48) | No   |      |      |
|                   |              | Twenge et al      | 52                   | 0                      | -1.87 (-2.2 to -1.54)  | -1.11 (-2.69 to 0.48) | No   |      |      |
|                   |              | Twenge et al      | 52                   | 100                    | -2.49 (-2.82 to -2.16) | -1.21 (-2.79 to 0.38) | No   |      |      |
|                   |              | Twenge et al      | 80                   | 0                      | -1.3 (-1.71 to -0.88)  | -1.05 (-2.63 to 0.53) | No   |      |      |
|                   |              | Twenge et al      | 80                   | 100                    | -1.92 (-2.34 to -1.5)  | -1.15 (-2.74 to 0.43) | No   |      |      |
|                   |              | McGinty et al (b) | 24                   | 0                      | -2.48 (-3.33 to -1.63) | -0.98 (-2.53 to 0.57) | No   |      |      |
|                   |              | McGinty et al (b) | 24                   | 100                    | -2.07 (-2.9 to -1.24)  | -1.05 (-2.6 to 0.5)   | No   |      |      |
|                   |              | McGinty et al (b) | 42                   | 0                      | -1.39 (-2 to -0.77)    | -0.96 (-2.5 to 0.59)  | No   |      |      |
|                   |              | McGinty et al (b) | 42                   | 100                    | -0.98 (-1.56 to -0.39) | -1.03 (-2.57 to 0.52) | No   |      |      |
|                   |              | McGinty et al (b) | 77                   | 0                      | -0.87 (-1.59 to -0.15) | -0.91 (-2.45 to 0.63) | No   |      |      |
|                   |              | McGinty et al (b) | 77                   | 100                    | -0.46 (-1.15 to 0.23)  | -0.98 (-2.52 to 0.57) | No   |      |      |
|                   | Zhou et al   | 54                | 52                   | -0.19 (-0.38 to -0.01) | -0.93 (-2.47 to 0.61)  | No                    |      |      |      |
|                   | Vieira et al | 46                | 0                    | -0.12 (-0.45 to 0.21)  | -1.07 (-2.64 to 0.5)   | No                    |      |      |      |
| Zhou et al        | 54           | 52                | 0.06 (-0.16 to 0.28) | -0.87 (-2.41 to 0.66)  | No                     |                       |      |      |      |
| Zhou et al        | 54           | 52                | 0.25 (0 to 0.5)      | -0.84 (-2.37 to 0.69)  | No                     |                       |      |      |      |
| China             | Zhang et al  | 13                | 41                   | -0.19 (-0.41 to 0.03)  | -0.07 (-1.61 to 1.47)  | No                    | 0.71 | 1.06 |      |
|                   | Choi et al   | 58                | 55                   | -1.13 (-1.68 to -0.58) | -0.13 (-1.67 to 1.41)  | No                    |      |      |      |

|       |                |    |     |                        |                       |    |      |      |
|-------|----------------|----|-----|------------------------|-----------------------|----|------|------|
| Japan | Kikuchi et al  | 24 | 0   | -0.12 (-0.67 to 0.43)  | -0.13 (-1.84 to 1.58) | No | 0.44 | 0.65 |
|       | Kikuchi et al  | 24 | 100 | -0.21 (-0.75 to 0.34)  | -0.15 (-1.86 to 1.55) | No |      |      |
|       | Kikuchi et al  | 34 | 0   | 0.06 (-0.46 to 0.59)   | -0.13 (-1.83 to 1.58) | No |      |      |
|       | Kikuchi et al  | 34 | 100 | -0.02 (-0.54 to 0.5)   | -0.15 (-1.86 to 1.56) | No |      |      |
|       | Kikuchi et al  | 44 | 0   | -0.32 (-0.89 to 0.25)  | -0.12 (-1.83 to 1.59) | No |      |      |
|       | Kikuchi et al  | 44 | 100 | -0.41 (-0.97 to 0.16)  | -0.14 (-1.85 to 1.56) | No |      |      |
|       | Kikuchi et al  | 54 | 0   | -0.16 (-0.81 to 0.5)   | -0.12 (-1.83 to 1.59) | No |      |      |
|       | Kikuchi et al  | 54 | 100 | -0.24 (-0.89 to 0.41)  | -0.14 (-1.85 to 1.57) | No |      |      |
|       | Kikuchi et al  | 64 | 0   | -0.56 (-1.34 to 0.22)  | -0.11 (-1.82 to 1.6)  | No |      |      |
|       | Kikuchi et al  | 64 | 100 | -0.64 (-1.42 to 0.13)  | -0.14 (-1.84 to 1.57) | No |      |      |
|       | Kikuchi et al  | 74 | 0   | -0.49 (-1.4 to 0.42)   | -0.11 (-1.82 to 1.61) | No |      |      |
|       | Kikuchi et al  | 74 | 100 | -0.57 (-1.48 to 0.34)  | -0.13 (-1.84 to 1.58) | No |      |      |
|       | Yamamoto et al | 18 | 0   | -1.95 (-2.36 to -1.53) | -0.94 (-2.91 to 1.04) | No |      |      |
|       | Yamamoto et al | 18 | 100 | -2.09 (-2.5 to -1.68)  | -0.99 (-2.97 to 0.99) | No |      |      |
|       | Yamamoto et al | 30 | 0   | -0.95 (-1.1 to -0.8)   | -0.92 (-2.9 to 1.05)  | No |      |      |
|       | Yamamoto et al | 30 | 100 | -1.09 (-1.23 to -0.95) | -0.98 (-2.95 to 1)    | No |      |      |
|       | Yamamoto et al | 52 | 0   | -0.89 (-1.03 to -0.74) | -0.9 (-2.87 to 1.07)  | No |      |      |
|       | Yamamoto et al | 52 | 100 | -1.02 (-1.16 to -0.89) | -0.95 (-2.93 to 1.02) | No |      |      |
|       | Yamamoto et al | 77 | 0   | 0.24 (-0.14 to 0.61)   | -0.88 (-2.85 to 1.09) | No |      |      |
|       | Yamamoto et al | 77 | 100 | 0.1 (-0.28 to 0.47)    | -0.93 (-2.9 to 1.04)  | No |      |      |
|       | Kiuchi et al   | 21 | 100 | -1.06 (-1.57 to -0.55) | -0.96 (-2.94 to 1.01) | No |      |      |
|       | Kiuchi et al   | 24 | 0   | -0.36 (-1.04 to 0.33)  | -0.91 (-2.88 to 1.06) | No |      |      |
|       | Kiuchi et al   | 27 | 100 | -0.58 (-1.02 to -0.15) | -0.96 (-2.93 to 1.02) | No |      |      |
|       | Kiuchi et al   | 32 | 0   | -0.77 (-1.39 to -0.15) | -0.9 (-2.87 to 1.07)  | No |      |      |
|       | Kiuchi et al   | 32 | 100 | -1 (-1.37 to -0.64)    | -0.95 (-2.92 to 1.02) | No |      |      |
|       | Kiuchi et al   | 37 | 0   | -1.09 (-1.69 to -0.49) | -0.9 (-2.87 to 1.07)  | No |      |      |
|       | Kiuchi et al   | 37 | 100 | -1.01 (-1.45 to -0.57) | -0.95 (-2.92 to 1.03) | No |      |      |
|       | Kiuchi et al   | 42 | 100 | -0.96 (-1.43 to -0.49) | -0.94 (-2.91 to 1.03) | No |      |      |
|       | Kiuchi et al   | 44 | 0   | -1.02 (-1.54 to -0.49) | -0.89 (-2.86 to 1.08) | No |      |      |
|       | Kiuchi et al   | 47 | 100 | -0.97 (-1.65 to -0.29) | -0.94 (-2.91 to 1.03) | No |      |      |

|  |                |                |    |                       |                        |                       |    |      |      |
|--|----------------|----------------|----|-----------------------|------------------------|-----------------------|----|------|------|
|  |                | Kiuchi et al   | 74 | 0                     | -0.81 (-1.65 to 0.02)  | -0.86 (-2.83 to 1.1)  | No |      |      |
|  |                | Kiuchi et al   | 74 | 100                   | -1.04 (-1.7 to -0.38)  | -0.91 (-2.88 to 1.06) | No |      |      |
|  | Czechia        | Winkler et al  | 58 | 54                    | -0.56 (-0.72 to -0.39) | -0.81 (-2.61 to 0.99) | No | 0.25 | 0.45 |
|  | UK             | Widnall et al  | 14 | 0                     | 0.47 (0.14 to 0.8)     | -1.66 (-4.16 to 0.84) | No | 0.85 | 0.37 |
|  |                | Widnall et al  | 14 | 100                   | 0 (-0.22 to 0.22)      | -1.77 (-4.29 to 0.75) | No |      |      |
|  |                | Katz et al     | 48 | 0                     | 0 (-2.01 to 2.01)      | -0.81 (-3.39 to 1.78) | No |      |      |
|  |                | Katz et al     | 48 | 0                     | -0.46 (-1.55 to 0.63)  | -1.2 (-3.6 to 1.19)   | No |      |      |
|  |                | Katz et al     | 48 | 100                   | 0.29 (-0.77 to 1.35)   | -0.92 (-3.52 to 1.68) | No |      |      |
|  |                | Katz et al     | 48 | 100                   | -0.18 (-1 to 0.65)     | -1.32 (-3.72 to 1.08) | No |      |      |
|  |                | Daly et al (a) | 26 | 0                     | -0.71 (-0.85 to -0.57) | -1.82 (-4.24 to 0.61) | No |      |      |
|  |                | Daly et al (a) | 26 | 100                   | -0.88 (-1.02 to -0.75) | -1.93 (-4.36 to 0.5)  | No |      |      |
|  |                | Daly et al (a) | 42 | 0                     | -0.55 (-0.69 to -0.42) | -1.36 (-3.74 to 1.02) | No |      |      |
|  |                | Daly et al (a) | 42 | 100                   | -0.73 (-0.86 to -0.6)  | -1.48 (-3.86 to 0.91) | No |      |      |
|  |                | Daly et al (a) | 57 | 0                     | -0.34 (-0.48 to -0.21) | -0.94 (-3.31 to 1.44) | No |      |      |
|  |                | Daly et al (a) | 57 | 100                   | -0.52 (-0.65 to -0.39) | -1.05 (-3.43 to 1.33) | No |      |      |
|  |                | Daly et al (a) | 82 | 0                     | -0.66 (-0.81 to -0.51) | -0.23 (-2.68 to 2.23) | No |      |      |
|  |                | Daly et al (a) | 82 | 100                   | -0.83 (-0.98 to -0.69) | -0.34 (-2.79 to 2.1)  | No |      |      |
|  |                | Daly et al (a) | 26 | 0                     | -0.54 (-0.68 to -0.4)  | -1.52 (-3.62 to 0.58) | No |      |      |
|  |                | Daly et al (a) | 26 | 100                   | -0.62 (-0.75 to -0.49) | -1.61 (-3.72 to 0.49) | No |      |      |
|  |                | Daly et al (a) | 42 | 0                     | -0.48 (-0.62 to -0.34) | -1.14 (-3.2 to 0.93)  | No |      |      |
|  |                | Daly et al (a) | 42 | 100                   | -0.56 (-0.69 to -0.43) | -1.23 (-3.3 to 0.84)  | No |      |      |
|  |                | Daly et al (a) | 57 | 0                     | -0.32 (-0.46 to -0.19) | -0.78 (-2.85 to 1.28) | No |      |      |
|  |                | Daly et al (a) | 57 | 100                   | -0.4 (-0.53 to -0.28)  | -0.88 (-2.94 to 1.19) | No |      |      |
|  |                | Daly et al (a) | 82 | 0                     | -0.53 (-0.69 to -0.38) | -0.19 (-2.32 to 1.94) | No |      |      |
|  |                | Daly et al (a) | 82 | 100                   | -0.61 (-0.76 to -0.47) | -0.29 (-2.41 to 1.84) | No |      |      |
|  |                | Daly et al (a) | 26 | 0                     | -0.41 (-0.55 to -0.27) | -1.12 (-2.84 to 0.6)  | No |      |      |
|  |                | Daly et al (a) | 26 | 100                   | -0.43 (-0.56 to -0.29) | -1.19 (-2.92 to 0.54) | No |      |      |
|  |                | Daly et al (a) | 42 | 0                     | -0.39 (-0.53 to -0.25) | -0.84 (-2.54 to 0.86) | No |      |      |
|  |                | Daly et al (a) | 42 | 100                   | -0.4 (-0.54 to -0.27)  | -0.91 (-2.61 to 0.79) | No |      |      |
|  | Daly et al (a) | 57             | 0  | -0.3 (-0.43 to -0.16) | -0.58 (-2.28 to 1.12)  | No                    |    |      |      |

|  |             |                       |    |     |                        |                       |    |      |      |
|--|-------------|-----------------------|----|-----|------------------------|-----------------------|----|------|------|
|  |             | Daly et al (a)        | 57 | 100 | -0.31 (-0.44 to -0.18) | -0.65 (-2.35 to 1.05) | No |      |      |
|  |             | Daly et al (a)        | 82 | 0   | -0.43 (-0.58 to -0.28) | -0.14 (-1.89 to 1.6)  | No |      |      |
|  |             | Daly et al (a)        | 82 | 100 | -0.44 (-0.59 to -0.3)  | -0.21 (-1.96 to 1.53) | No |      |      |
|  |             | Kwong et al           | 28 | 73  | -0.71 (-0.89 to -0.53) | -1.45 (-4.03 to 1.14) | No |      |      |
|  | Norway      | Knudsen et al         | 42 | 62  | 0.58 (0.15 to 1.01)    | -0.2 (-1.75 to 1.35)  | No | 0.56 | 0.63 |
|  |             | Knudsen et al         | 42 | 62  | 0.26 (-2.06 to 2.59)   | -0.11 (-1.66 to 1.44) | No |      |      |
|  |             | Knudsen et al         | 42 | 62  | 0.32 (-0.17 to 0.8)    | -0.11 (-1.66 to 1.44) | No |      |      |
|  | Australia   | ABS (2020)            | 26 | 0   | -1.24 (-1.73 to -0.75) | -0.14 (-1.74 to 1.47) | No | 0.5  | 0.48 |
|  |             | ABS (2020)            | 50 | 0   | -0.16 (-0.51 to 0.19)  | -0.13 (-1.73 to 1.48) | No |      |      |
|  |             | ABS (2020)            | 50 | 100 | -0.48 (-0.77 to -0.19) | -0.15 (-1.76 to 1.46) | No |      |      |
|  |             | ABS (2020)            | 82 | 0   | 0.29 (-0.15 to 0.72)   | -0.11 (-1.71 to 1.5)  | No |      |      |
|  |             | ABS (2020)            | 82 | 100 | -0.04 (-0.43 to 0.36)  | -0.13 (-1.74 to 1.48) | No |      |      |
|  |             | Biddle et al          | 58 | 50  | -0.26 (-0.43 to -0.09) | -0.25 (-1.86 to 1.36) | No |      |      |
|  | New Zealand | Sibley et al          | 58 | 65  | 0.14 (-0.23 to 0.5)    | -0.22 (-1.64 to 1.21) | No | 0.7  | 0.6  |
|  |             | Every-Palmer et al    | 21 | 51  | -1.97 (-2.34 to -1.61) | -1 (-2.62 to 0.61)    | No |      |      |
|  |             | Every-Palmer et al    | 30 | 51  | -2.09 (-2.39 to -1.79) | -0.99 (-2.6 to 0.62)  | No |      |      |
|  |             | Every-Palmer et al    | 40 | 51  | -2.31 (-2.65 to -1.98) | -0.97 (-2.59 to 0.64) | No |      |      |
|  |             | Every-Palmer et al    | 50 | 51  | -1.47 (-1.81 to -1.13) | -0.96 (-2.57 to 0.66) | No |      |      |
|  |             | Every-Palmer et al    | 60 | 51  | -0.93 (-1.34 to -0.51) | -0.94 (-2.56 to 0.68) | No |      |      |
|  |             | Every-Palmer et al    | 70 | 51  | -1 (-1.56 to -0.45)    | -0.92 (-2.55 to 0.7)  | No |      |      |
|  |             | Every-Palmer et al    | 82 | 51  | -0.83 (-1.7 to 0.04)   | -0.9 (-2.53 to 0.73)  | No |      |      |
|  |             | Bulbulia et al        | 58 | 65  | 0.04 (-0.34 to 0.42)   | -0.22 (-1.64 to 1.21) | No |      |      |
|  | France      | Sante Publique France | 58 | 50  | -0.85 (-0.95 to -0.74) | -1.13 (-3.11 to 0.85) | No | 0.6  | 0.62 |
|  |             | Sante Publique France | 58 | 50  | -0.56 (-0.67 to -0.45) | -1.16 (-3.21 to 0.89) | No |      |      |
|  |             | Sante Publique France | 58 | 50  | -0.35 (-0.47 to -0.23) | -1.09 (-2.96 to 0.78) | No |      |      |
|  |             | Sante Publique France | 58 | 50  | -0.4 (-0.52 to -0.28)  | -1.06 (-2.87 to 0.74) | No |      |      |
|  |             | Sante Publique France | 58 | 50  | -0.35 (-0.47 to -0.23) | -1.04 (-2.78 to 0.7)  | No |      |      |
|  |             | Sante Publique France | 58 | 50  | -0.37 (-0.49 to -0.25) | -1.02 (-2.72 to 0.68) | No |      |      |
|  |             | Sante Publique France | 58 | 50  | -0.31 (-0.43 to -0.19) | -0.96 (-2.54 to 0.62) | No |      |      |
|  |             | Sante Publique France | 58 | 50  | -0.26 (-0.39 to -0.14) | -0.92 (-2.44 to 0.59) | No |      |      |

|                      |                       |                       |     |                      |                        |                       |    |      |      |
|----------------------|-----------------------|-----------------------|-----|----------------------|------------------------|-----------------------|----|------|------|
|                      | Sante Publique France | Sante Publique France | 58  | 50                   | -0.24 (-0.36 to -0.11) | -0.89 (-2.36 to 0.58) | No |      |      |
|                      |                       | Sante Publique France | 58  | 50                   | -0.19 (-0.32 to -0.07) | -0.85 (-2.27 to 0.58) | No |      |      |
|                      |                       | Sante Publique France | 58  | 50                   | -0.13 (-0.26 to 0)     | -0.82 (-2.22 to 0.58) | No |      |      |
|                      |                       | Sante Publique France | 58  | 50                   | -0.27 (-0.39 to -0.15) | -0.79 (-2.18 to 0.6)  | No |      |      |
|                      |                       | Sante Publique France | 58  | 50                   | -0.31 (-0.43 to -0.19) | -0.81 (-2.21 to 0.59) | No |      |      |
|                      |                       | Sante Publique France | 58  | 50                   | -0.31 (-0.43 to -0.19) | -0.87 (-2.32 to 0.58) | No |      |      |
|                      |                       | Sante Publique France | 58  | 50                   | -0.34 (-0.46 to -0.22) | -0.87 (-2.32 to 0.58) | No |      |      |
|                      |                       | Sante Publique France | 58  | 50                   | -0.41 (-0.53 to -0.3)  | -0.97 (-2.57 to 0.63) | No |      |      |
|                      |                       | Sante Publique France | 58  | 50                   | -0.52 (-0.63 to -0.41) | -1.05 (-2.81 to 0.72) | No |      |      |
|                      |                       | Sante Publique France | 58  | 50                   | -0.37 (-0.49 to -0.26) | -1 (-2.65 to 0.66)    | No |      |      |
|                      |                       | Sante Publique France | 58  | 50                   | -0.48 (-0.6 to -0.37)  | -0.94 (-2.49 to 0.61) | No |      |      |
|                      |                       | Sante Publique France | 58  | 50                   | -0.42 (-0.54 to -0.3)  | -0.98 (-2.6 to 0.64)  | No |      |      |
|                      | Germany               | Ravens-Sieberer et al | 14  | 50                   | -0.6 (-0.8 to -0.39)   | -0.23 (-1.84 to 1.37) | No | 0.27 | 0.64 |
|                      |                       | Peters et al          | 47  | 52                   | -0.3 (-0.33 to -0.26)  | -0.18 (-1.79 to 1.42) | No |      |      |
|                      | Netherlands           | Van der Velden et al  | 26  | 0                    | 0.14 (-0.16 to 0.44)   | -0.29 (-1.89 to 1.31) | No | 0.31 | 0.47 |
|                      |                       | Van der Velden et al  | 26  | 100                  | 0.26 (-0.03 to 0.54)   | -0.35 (-1.94 to 1.25) | No |      |      |
|                      |                       | Van der Velden et al  | 42  | 0                    | -0.24 (-0.55 to 0.07)  | -0.27 (-1.87 to 1.33) | No |      |      |
|                      |                       | Van der Velden et al  | 42  | 100                  | -0.12 (-0.42 to 0.18)  | -0.33 (-1.92 to 1.27) | No |      |      |
|                      |                       | Van der Velden et al  | 57  | 0                    | -0.29 (-0.61 to 0.04)  | -0.25 (-1.85 to 1.35) | No |      |      |
|                      |                       | Van der Velden et al  | 57  | 100                  | -0.17 (-0.48 to 0.14)  | -0.31 (-1.9 to 1.29)  | No |      |      |
|                      |                       | Van der Velden et al  | 82  | 0                    | -0.03 (-0.39 to 0.32)  | -0.22 (-1.82 to 1.39) | No |      |      |
| Van der Velden et al |                       | 82                    | 100 | 0.08 (-0.26 to 0.43) | -0.27 (-1.87 to 1.33)  | No                    |    |      |      |

MDD = Major depressive disorder, USA = United States of America, UK = United Kingdom, CI = Confidence interval, PI = Prediction interval, LOCOCV = Leave-one-country-out cross-validation, RMSE = Root-mean-square error



## **Section 9. Authors' contributions**

Damian F Santomauro was responsible for the design of the study, development of the methods, and statistical analyses. Ana M Mantilla Herrera and Jamileh Shadid searched for data sources and did the title and abstract and full text screening of identified studies. Damian F Santomauro crosschecked all inclusions, reasons for exclusion, and extracted the data. Damian F Santomauro, Alize J Ferrari, Ana M Mantilla Herrera, and Jamileh Shadid wrote the first draft of the manuscript. Damian F Santomauro, Alize J Ferrari, and Harvey A Whiteford critically revised the manuscript for important intellectual content. All authors contributed to writing the final manuscript, critically reviewed the methods and results, and approved the final version of the manuscript. More information about individual author contributions to the research are below.

### **Section 9.1. Managing the estimation or publications process**

Damian F Santomauro, Charlie Ashbaugh, Joanne Amlag, Sabina Bloom, William J Dangel, Amanda Deen, Maja Pasovic, Simon I Hay, and Alize J Ferrari.

### **Section 9.2. Writing the first draft of the manuscript**

Damian F Santomauro, Ana M Mantilla Herrera, Jamileh Shadid, Harvey A Whiteford, and Alize J Ferrari.

### **Section 9.3. Primary responsibility for applying analytical methods to produce estimates**

Damian F Santomauro.

### **Section 9.4. Primary responsibility for seeking, cataloguing, extracting, or cleaning data; designing or coding figures and tables**

Damian F Santomauro, Ana M Mantilla Herrera, and Jamileh Shadid (for data inputs related to mental health indicators).

Damian F Santomauro, Ana M Mantilla Herrera, Jhilik Chattopadhyay, Rebecca M Cogen, Samuel B Ewald, Gaorui Guo, Monika Helak, Erin N Hulland, Bulat Idrisov, Akiya Lindstrom, Emily Linebarger, Ali H Mokdad, Paulami Naik, Shuhei Nomura, James Kevin O'Halloran, Louise Penberthy, Grace Reinke, Anh Truc Vo, Stefanie Watson, and Bethany Zigler (for data inputs related to COVID-19 indicators).

### **Section 9.5. Providing data or critical feedback on data sources**

Damian F Santomauro, Ana M Mantilla Herrera, Jamileh Shadid, Charlie Ashbaugh, Alize Ferrari, Harvey A Whiteford (for data inputs related to mental health indicators).

Damian F Santomauro, Ana M Mantilla Herrera, David Pigott, Cristiana Abbafati, Christopher Adolph, Bree L Bang-Jensen, Gregory J Bertolacci, Rachel Castellano, Suman Chakrabarti, Carolyn Dapper, Megan Erickson, Abraham D Flaxman, Nancy Fullman, Ababi Zergaw Giref, Gaorui Guo, Erin N Hulland, Bulat Idrisov, Emily Linebarger, Paulo A Lotufo, Beatrice Magistro, Deborah Carvalho Malta, Johan Månsson, Fatima Marinho, Ali H Mokdad, Lorenzo Monasta, Shuhei Nomura, Maja Pasovic, Robert C Reiner Jr, Antonio Luiz P Ribeiro, Elena Varavikova, Anh Truc Vo, Rebecca Walcott, Stefanie Watson, Charles Shey Wiysonge, Simon I Hay, Theo Vos, Christopher J L Murray, and Alize J Ferrari (for data inputs related to COVID-19 indicators).

### **Section 9.5. Developing methods or computational machinery**

Damian F Santomauro, Ana M Mantilla Herrera, Jamileh Shadid, Charlie Ashbaugh, David Pigott, Peng Zheng, Joanne O Amlag, Emma Castro, James K Collins, Xiaochen Dai, Abraham D Flaxman, Joseph Jon Frostad, John R Giles, Jiawei He, Ali H Mokdad, Robert C Reiner Jr, Aleksei Sholokhov, Reed J D Sorensen, Theo Vos, Christopher J L Murray, Harvey A Whiteford, and Alize J Ferrari.

### **Section 9.6. Providing critical feedback on methods or results**

Damian F Santomauro, Ana M Mantilla Herrera, Jamileh Shadid, Charlie Ashbaugh, David Pigott, Peng Zheng, Ali H Mokdad, Simon I Hay, Theo Vos, Christopher J L Murray, Harvey A Whiteford, and Alize J Ferrari.

**Section 9.7. Drafting the work or revising is critically for important intellectual content**

Damian F Santomauro, Ana M Mantilla Herrera, Jamileh Shadid, Charlie Ashbaugh, David Pigott, Peng Zheng, Ali H Mokdad, Simon I Hay, Theo Vos, Christopher J L Murray, Harvey A Whiteford, and Alize J Ferrari.

**Section 9.7. Managing the overall research enterprise**

Damian F Santomauro, David Pigott, Rafael Lozano, Ali H Mokdad, Simon I Hay, Theo Vos, Christopher J L Murray, Harvey A Whiteford, and Alize J Ferrari.
